# Supplementary material for: Genomic Investigation of Salmonella Typhi in Hong Kong Revealing the Predominance of Genotype 3.2.2 and the First Case of an Extensively Drug-Resistant H58 Genotype
Source: Microorganisms. 2023 Mar 6;11(3):667. doi: 10.3390/microorganisms11030667 (PMC10058776; doi:10.3390/microorganisms11030667)
Supplement: Supplementary file 1 [file microorganisms-11-00667-s001.zip › microorganisms-2220969-supplementary-Tables S1-S3.xlsx]

## Sheet: Table S1 genotype 3.2.2
N on tree	Reads_id	Country/region	Region	Type	color code	Collecting date	strain name	Biosample	Assembly	Assembly Name	WGS project accession	BioProject	Source
1	ERR5201347	India	South Asia	3.0.1	#b2df8a	2018-06-11	Z10080	SAMEA7883769	N/A	N/A	N/A	PRJEB42715	da Silva et al., 2022
2	ERR4325962	Bangladesh	South Asia	3.0.1	#b2df8a	2018-01-28	29999_5#133	SAMEA5596398	N/A	N/A	N/A	PRJEB30334	da Silva et al., 2022
3	ERR4992658	India	South Asia	3.0.1	#b2df8a	2018-06-04	B10052	SAMEA5779499	N/A	N/A	N/A	PRJEB14050	da Silva et al., 2022
4	ERR4790690	India	South Asia	3.0.1	#b2df8a	2018-04-20	B10029	SAMEA5779399	N/A	N/A	N/A	PRJEB14050	da Silva et al., 2022
5	ERR4790815	India	South Asia	3.0.1	#b2df8a	2018-03-13	B10011	SAMEA5779362	N/A	N/A	N/A	PRJEB14050	da Silva et al., 2022
6	ERR4790830	India	South Asia	3.0.1	#b2df8a	2018-03-21	B10012	SAMEA5779371	N/A	N/A	N/A	PRJEB14050	da Silva et al., 2022
7	ERR4790749	India	South Asia	3.0.1	#b2df8a	2018-06-15	B10057	SAMEA5779428	N/A	N/A	N/A	PRJEB14050	da Silva et al., 2022
8	ERR4025708	Pakistan	South Asia	3.0.1	#b2df8a	2018-10-11	29050_1#230	SAMEA5189120	N/A	N/A	N/A	PRJEB30334	da Silva et al., 2022
9	ERR4025694	Pakistan	South Asia	3.0.1	#b2df8a	2018-10-08	29050_1#203	SAMEA5189113	N/A	N/A	N/A	PRJEB30334	da Silva et al., 2022
10	ERR4025551	Pakistan	South Asia	3.0.1	#b2df8a	2017-05-04	28933_2#383	SAMEA5188343	N/A	N/A	N/A	PRJEB30334	da Silva et al., 2022
11	ERR4025339	Pakistan	South Asia	3.0.1	#b2df8a	2017-04-17	28933_2#171	SAMEA5188531	N/A	N/A	N/A	PRJEB30334	da Silva et al., 2022
12	ERR4025541	Pakistan	South Asia	3.0.1	#b2df8a	2017-11-02	28933_2#373	SAMEA5188552	N/A	N/A	N/A	PRJEB30334	da Silva et al., 2022
13	ERR4025384	Pakistan	South Asia	3.0.1	#b2df8a	2017-12-08	28933_2#216	SAMEA5188580	N/A	N/A	N/A	PRJEB30334	da Silva et al., 2022
14	ERR4025441	Pakistan	South Asia	3.0.1	#b2df8a	2017-03-25	28933_2#273	SAMEA5188298	N/A	N/A	N/A	PRJEB30334	da Silva et al., 2022
15	ERR4025279	Pakistan	South Asia	3.0.1	#b2df8a	2017-05-24	28933_2#111	SAMEA5188385	N/A	N/A	N/A	PRJEB30334	da Silva et al., 2022
16	ERR4025532	Pakistan	South Asia	3.0.1	#b2df8a	2017-01-01	28933_2#364	SAMEA5188449	N/A	N/A	N/A	PRJEB30334	da Silva et al., 2022
17	ERR4025356	Pakistan	South Asia	3.0.1	#b2df8a	2017-03-03	28933_2#188	SAMEA5188284	N/A	N/A	N/A	PRJEB30334	da Silva et al., 2022
18	ERR4025529	Pakistan	South Asia	3.0.1	#b2df8a	2017-10-27	28933_2#361	SAMEA5188549	N/A	N/A	N/A	PRJEB30334	da Silva et al., 2022
19	ERR4025519	Pakistan	South Asia	3.0.1	#b2df8a	2017-04-24	28933_2#351	SAMEA5188332	N/A	N/A	N/A	PRJEB30334	da Silva et al., 2022
20	ERR4025343	Pakistan	South Asia	3.0.1	#b2df8a	2017-04-19	28933_2#175	SAMEA5188532	N/A	N/A	N/A	PRJEB30334	da Silva et al., 2022
21	ERR4025175	Pakistan	South Asia	3.0.1	#b2df8a	2017-05-06	28933_2#7	SAMEA5188345	N/A	N/A	N/A	PRJEB30334	da Silva et al., 2022
22	ERR4304089	Bangladesh	South Asia	3.1.2	#b2df8a	2017-09-07	29955_4#360	SAMEA5595608	N/A	N/A	N/A	PRJEB30334	da Silva et al., 2022
23	ERR4304095	Bangladesh	South Asia	3.1.2	#b2df8a	2018-01-03	29955_4#366	SAMEA5595812	N/A	N/A	N/A	PRJEB30334	da Silva et al., 2022
24	ERR4325955	Bangladesh	South Asia	3.1.2	#b2df8a	2017-10-16	29999_5#126	SAMEA5596492	N/A	N/A	N/A	PRJEB30334	da Silva et al., 2022
25	ERR4362688	Bangladesh	South Asia	3.1.2	#b2df8a	2017-08-17	30134_1#357	SAMEA5595908	N/A	N/A	N/A	PRJEB30334	da Silva et al., 2022
26	ERR4325995	Bangladesh	South Asia	3.1.2	#b2df8a	2017-10-16	29999_5#166	SAMEA5596503	N/A	N/A	N/A	PRJEB30334	da Silva et al., 2022
27	ERR4362388	Bangladesh	South Asia	3.1.2	#b2df8a	2017-12-17	30134_1#57	SAMEA5595832	N/A	N/A	N/A	PRJEB30334	da Silva et al., 2022
28	ERR4362693	Bangladesh	South Asia	3.1.2	#b2df8a	2017-08-20	30134_1#362	SAMEA5595909	N/A	N/A	N/A	PRJEB30334	da Silva et al., 2022
29	ERR4326070	Bangladesh	South Asia	3.1.2	#b2df8a	2017-10-15	29999_5#243	SAMEA5596522	N/A	N/A	N/A	PRJEB30334	da Silva et al., 2022
30	ERR4362575	Bangladesh	South Asia	3.1.2	#b2df8a	2017-10-04	30134_1#244	SAMEA5595879	N/A	N/A	N/A	PRJEB30334	da Silva et al., 2022
31	ERR4303887	Bangladesh	South Asia	3.1.2	#b2df8a	2017-09-09	29955_4#157	SAMEA5595547	N/A	N/A	N/A	PRJEB30334	da Silva et al., 2022
32	ERR331373	Tanzania	East Africa	3.1	#6a3d9a	2007	10060_6_76	SAMEA2059691	GCA_001082345.1	10060_6#76	CIPO01	PRJEB3215	Wong et al., 2015
33	ERR352254	Lebanon	Western Asia	3.1	#a64d79	2006	10492_1_1	SAMEA2143229	GCA_001092205.1	10492_1#1	CIYW01	PRJEB3215	Wong et al., 2015
34	ERR3804583	India	South Asia	3.1	#b2df8a	2017	23733_4_19	SAMEA104208240	N/A	N/A	N/A	PRJEB14050	Britto et al., 2019
35	ERR343295	India	South Asia	3.1	#b2df8a	2009	10349_1_47	SAMEA2072905	GCA_001128025.1	10349_1#47	CIXA01	PRJEB3215	Wong et al., 2015
36	ERR360629	Tunisia	North Africa	3.1	#7cd3e5	1961	10593_2_16	SAMEA1930272	GCA_001358155.1	10593_2#16	CGNY01	PRJEB3215	Wong et al., 2015
37	ERR352426	Liberia	West Africa	3.1	#76D6FF	2007	10493_1_1	SAMEA2159311	GCA_001112185.1	10493_1#1	CJBE01	PRJEB3215	Wong et al., 2015
38	ERR360631	China	East Asia	3.1	#bcbcbc	2002	10593_2_18	SAMEA1930270	GCA_001084985.1	10593_2#18	CJKF01	PRJEB3215	Wong et al., 2015
39	ERR984791	Senegal	West Africa	3.1	#76D6FF	2012	16404_4_90	SAMEA3276105	N/A	N/A	N/A	PRJNA514245	Park et al.,2018
40	ERR360659	Guinea	West Africa	3.1	#76D6FF	1999	10593_2_46	SAMEA1930155	GCA_001137065.1	10593_2#46	CJKW01	PRJEB3215	Wong et al., 2015
41	ERR349405	Vietnam	Southeast Asia	3.1	#fdbf6f	1993	10425_1_75	SAMEA2152014	GCA_001240755.1	10425_1#75	CUYO01	PRJEB3215	Wong et al., 2015
42	ERR294858	United States of America	North America	3.1	#d9d2e9	1958	9472_4_78	SAMEA1904372	GCA_001317685.2	Quail_strain_86	CGSQ01	PRJEB1398	Wong et al., 2015
43	SRR7165526	Ethiopia	East Africa	3.1	#6a3d9a	2014	SRR7165526	SAMN09209881	GCA_007203535.1	PDT000314696.2	AAHHVS01	PRJNA248792	Ingle et al., 2019
44	ERR352256	Malta	Southern Europe	3.1	#b45f06	2009	10492_1_3	SAMEA2163024	GCA_001141905.1	10492_1#3	CIZL01	PRJEB3215	Wong et al., 2015
45	ERR360483	Algeria	North Africa	3.1	#7cd3e5	1999	10592_2_35	SAMEA1930156	GCA_001120845.1	10592_2#35	CJJD01	PRJEB3215	Wong et al., 2015
46	ERR338049	South Africa	Southern Africa	3.1	#33a02c	2012	10071_3_73	SAMEA2059201	GCA_001082765.1	10071_3#73	CILA01	PRJEB3215	Wong et al., 2015
47	ERR360694	Tunisia	North Africa	3.1	#7cd3e5	2000	10593_2_81	SAMEA1930172	GCA_001357255.1	10593_2#81	CGPM01	PRJEB3215	Wong et al., 2015
48	ERR360522	Morocco	North Africa	3.1	#7cd3e5	1999	10592_2_74	SAMEA1930158	GCA_001357075.1	10592_2#74	CGNG01	PRJEB3215	Wong et al., 2015
49	ERR6294593	Nepal	South Asia	3.3.2	#b2df8a	2016-10-20	28832_1#74	SAMEA9404109	N/A	N/A	N/A	PRJEB30334	da Silva et al., 2022
50	ERR331307	Laos	Southeast Asia	3.4	#fdbf6f	2009	10060_6_10	SAMEA2059527	GCA_001361335.1	10060_6#10	CGIX01	PRJEB3215	Wong et al., 2015
51	ERR331320	Laos	Southeast Asia	3.4	#fdbf6f	2008	10060_6_23	SAMEA2055251	GCA_001358875.1	10060_6#23	CGKC01	PRJEB3215	Wong et al., 2015
52	ERR326658	Laos	Southeast Asia	3.4	#fdbf6f	2010	9953_5_62	SAMEA2057365	GCA_001085225.1	9953_5#62	CJYF01	PRJEB3215	Wong et al., 2015
53	ERR326659	Laos	Southeast Asia	3.4	#fdbf6f	2010	9953_5_63	SAMEA2056531	GCA_001154205.1	9953_5#63	CJYH01	PRJEB3215	Wong et al., 2015
54	ERR326657	Laos	Southeast Asia	3.4	#fdbf6f	2010	9953_5_61	SAMEA2059364	GCA_001160865.1	9953_5#61	CJYG01	PRJEB3215	Wong et al., 2015
55	ERR360747	Cambodia	Southeast Asia	3.4	#fdbf6f	2010	10607_1_51	SAMEA2148246	GCA_001364255.1	10607_1#51	CGPQ01	PRJEB3215	Pham Thanh et al., 2016
56	ERR349537	Vietnam	Southeast Asia	3.4	#fdbf6f	1996	10426_1_15	SAMEA2161670	GCA_001367975.1	10426_1#15	CVAL01	PRJEB3215	Wong et al., 2015
57	ERR357646	Vietnam	Southeast Asia	3.4	#fdbf6f	1995	10561_2_71	SAMEA2143884	GCA_001362915.1	10561_2#71	CVGD01	PRJEB3215	Wong et al., 2015
58	ERR349351	Vietnam	Southeast Asia	3.4	#fdbf6f	1995	10425_1_21	SAMEA2143650	GCA_001239745.1	10425_1#21	CUYY01	PRJEB3215	Wong et al., 2015
59	ERR360649	Vietnam	Southeast Asia	3.4	#fdbf6f	1972	10593_2_36	SAMEA1930265	GCA_001358095.1	10593_2#36	CVGP01	PRJEB3215	Wong et al., 2015
60	ERR349406	Vietnam	Southeast Asia	3.4	#fdbf6f	1994	10425_1_76	SAMEA2147482	GCA_001240005.1	10425_1#76	CUZA01	PRJEB3215	Wong et al., 2015
61	ERR331300	Laos	Southeast Asia	3.4	#fdbf6f	2009	10060_6_3	SAMEA2056542	GCA_001359655.1	10060_6#3	CEYP01	PRJEB3215	Wong et al., 2015
62	ERR326677	Laos	Southeast Asia	3.4	#fdbf6f	2008	9953_5_81	SAMEA2056537	GCA_001148345.1	9953_5#81	CJYZ01	PRJEB3215	Wong et al., 2015
63	ERR331359	Laos	Southeast Asia	3.4	#fdbf6f	2009	10060_6_62	SAMEA2055264	GCA_001358955.1	10060_6#62	CGKQ01	PRJEB3215	Wong et al., 2015
64	ERR331360	Laos	Southeast Asia	3.4	#fdbf6f	2009	10060_6_63	SAMEA2056711	GCA_001079445.1	10060_6#63	CIPI01	PRJEB3215	Wong et al., 2015
65	ERR326683	Laos	Southeast Asia	3.4	#fdbf6f	2008	9953_5_87	SAMEA2056539	GCA_001142965.1	9953_5#87	CJZB01	PRJEB3215	Wong et al., 2015
66	ERR326681	Laos	Southeast Asia	3.4	#fdbf6f	2008	9953_5_85	SAMEA1965836	GCA_001358335.1	9953_5#85	CHMV01	PRJEB3215	Wong et al., 2015
67	ERR326686	Laos	Southeast Asia	3.4	#fdbf6f	2008	9953_5_90	SAMEA2056540	GCA_001112445.1	9953_5#90	CJZE01	PRJEB3215	Wong et al., 2015
68	ERR586724	Thailand	Southeast Asia	3.4	#fdbf6f	1985	13244_5_28	SAMEA2494160	N/A	N/A	N/A	PRJNA514245	Dyson et., 2017
69	ERR586723	Thailand	Southeast Asia	3.4	#fdbf6f	1985	13244_5_27	SAMEA2494159	N/A	N/A	N/A	PRJNA514245	Dyson et., 2017
70	ERR326663	Laos	Southeast Asia	3.4	#fdbf6f	2010	9953_5_67	SAMEA2059366	GCA_001087725.1	9953_5#67	CJYL01	PRJEB3215	Wong et al., 2015
71	ERR340782	Laos	Southeast Asia	3.4	#fdbf6f	2000	10209_5_26	SAMEA2066524	GCA_001361815.1	10209_5#26	CHLQ01	PRJEB3215	Wong et al., 2015
72	ERR326680	Laos	Southeast Asia	3.4	#fdbf6f	2008	9953_5_84	SAMEA2056538	GCA_001114745.1	9953_5#84	CJYY01	PRJEB3215	Wong et al., 2015
73	ERR326679	Laos	Southeast Asia	3.4	#fdbf6f	2008	9953_5_83	SAMEA2057372	GCA_001173685.1	9953_5#83	CJYV01	PRJEB3215	Wong et al., 2015
74	ERR326682	Laos	Southeast Asia	3.4	#fdbf6f	2008	9953_5_86	SAMEA2057373	GCA_001134005.1	9953_5#86	CJZA01	PRJEB3215	Wong et al., 2015
75	ERR331361	Laos	Southeast Asia	3.4	#fdbf6f	2009	10060_6_64	SAMEA2059687	GCA_001361555.1	10060_6#64	CGKI01	PRJEB3215	Wong et al., 2015
76	ERR326685	Laos	Southeast Asia	3.4	#fdbf6f	2008	9953_5_89	SAMEA2057374	GCA_001166125.1	9953_5#89	CJZC01	PRJEB3215	Wong et al., 2015
77	ERR331365	Laos	Southeast Asia	3.4	#fdbf6f	2010	10060_6_68	SAMEA2055439	GCA_001080605.1	10060_6#68	CIPK01	PRJEB3215	Wong et al., 2015
78	ERR340804	Laos	Southeast Asia	3.4	#fdbf6f	2002	10209_5_48	SAMEA2067825	GCA_001127105.1	10209_5#48	CIVU01	PRJEB3215	Wong et al., 2015
79	ERR331322	Laos	Southeast Asia	3.4	#fdbf6f	2009	10060_6_25	SAMEA2059532	GCA_001361395.1	10060_6#25	CGJJ01	PRJEB3215	Wong et al., 2015
80	ERR331302	Laos	Southeast Asia	3.4	#fdbf6f	2008	10060_6_5	SAMEA2057376	GCA_001081665.1	10060_6#5	CIPD01	PRJEB3215	Wong et al., 2015
81	ERR331329	Laos	Southeast Asia	3.4	#fdbf6f	2010	10060_6_32	SAMEA2055254	GCA_001358895.1	10060_6#32	CGKL01	PRJEB3215	Wong et al., 2015
82	ERR331326	Laos	Southeast Asia	3.4	#fdbf6f	2009	10060_6_29	SAMEA2055253	GCA_001079485.1	10060_6#29	CIOR01	PRJEB3215	Wong et al., 2015
83	ERR340813	Laos	Southeast Asia	3.4	#fdbf6f	2003	10209_5_59	SAMEA2066534	GCA_001096745.1	10209_5#59	CIWB01	PRJEB3215	Wong et al., 2015
84	ERR331343	Laos	Southeast Asia	3.4	#fdbf6f	2003	10060_6_46	SAMEA1966168	GCA_001079165.1	10060_6#46	CIOX01	PRJEB3215	Wong et al., 2015
85	ERR331340	Laos	Southeast Asia	3.4	#fdbf6f	2003	10060_6_43	SAMEA2059536	GCA_001361455.1	10060_6#43	CGKH01	PRJEB3215	Wong et al., 2015
86	ERR331342	Laos	Southeast Asia	3.4	#fdbf6f	2003	10060_6_45	SAMEA2056706	GCA_001081025.1	10060_6#45	CIPB01	PRJEB3215	Wong et al., 2015
87	ERR331355	Laos	Southeast Asia	3.4	#fdbf6f	2004	10060_6_58	SAMEA2059685	GCA_001361515.1	10060_6#58	CGSV01	PRJEB3215	Wong et al., 2015
88	ERR331345	Laos	Southeast Asia	3.4	#fdbf6f	2003	10060_6_48	SAMEA2056707	GCA_001359875.1	10060_6#48	CGKO01	PRJEB3215	Wong et al., 2015
89	ERR340781	Laos	Southeast Asia	3.4	#fdbf6f	2001	10209_5_25	SAMEA2064361	GCA_001120445.1	10209_5#25	CIUY01	PRJEB3215	Wong et al., 2015
90	ERR326676	Laos	Southeast Asia	3.4	#fdbf6f	2008	9953_5_80	SAMEA2057371	GCA_001107945.1	9953_5#80	CJYX01	PRJEB3215	Wong et al., 2015
91	ERR326662	Laos	Southeast Asia	3.4	#fdbf6f	2007	9953_5_66	SAMEA2056532	GCA_001153245.1	9953_5#66	CJYK01	PRJEB3215	Wong et al., 2015
92	ERR326689	Laos	Southeast Asia	3.4	#fdbf6f	2008	9953_5_93	SAMEA2056541	GCA_001359635.1	9953_5#93	CEYR01	PRJEB3215	Wong et al., 2015
93	ERR326670	Laos	Southeast Asia	3.4	#fdbf6f	2010	9953_5_74	SAMEA2057369	GCA_001360415.1	9953_5#74	CHNA01	PRJEB3215	Wong et al., 2015
94	ERR331356	Laos	Southeast Asia	3.4	#fdbf6f	2004	10060_6_59	SAMEA2055263	GCA_001081705.1	10060_6#59	CIPH01	PRJEB3215	Wong et al., 2015
95	ERR340777	Laos	Southeast Asia	3.4	#fdbf6f	2001	10209_5_21	SAMEA2067739	GCA_001361975.1	10209_5#21	CHFV01	PRJEB3215	Wong et al., 2015
96	ERR340780	Laos	Southeast Asia	3.4	#fdbf6f	2001	10209_5_24	SAMEA1967987	GCA_001152505.1	10209_5#24	CIVG01	PRJEB3215	Wong et al., 2015
97	ERR326661	Laos	Southeast Asia	3.4	#fdbf6f	2007	9953_5_65	SAMEA2057366	GCA_001094085.1	9953_5#65	CJYJ01	PRJEB3215	Wong et al., 2015
98	ERR326669	Laos	Southeast Asia	3.4	#fdbf6f	2010	9953_5_73	SAMEA2059368	GCA_001165665.1	9953_5#73	CJYR01	PRJEB3215	Wong et al., 2015
99	ERR331318	Laos	Southeast Asia	3.4	#fdbf6f	2008	10060_6_21	SAMEA2056698	GCA_001080885.1	10060_6#21	CIOI01	PRJEB3215	Wong et al., 2015
100	ERR340778	Laos	Southeast Asia	3.4	#fdbf6f	2001	10209_5_22	SAMEA2064360	GCA_001156405.1	10209_5#22	CIVB01	PRJEB3215	Wong et al., 2015
101	ERR340803	Laos	Southeast Asia	3.4	#fdbf6f	2002	10209_5_47	SAMEA2066531	GCA_001138465.1	10209_5#47	CIVP01	PRJEB3215	Wong et al., 2015
102	ERR340779	Laos	Southeast Asia	3.4	#fdbf6f	2001	10209_5_23	SAMEA2066523	GCA_001097145.1	10209_5#23	CIVE01	PRJEB3215	Wong et al., 2015
103	ERR326673	Laos	Southeast Asia	3.4	#fdbf6f	2010	9953_5_77	SAMEA2057370	GCA_001360435.1	9953_5#77	CHGI01	PRJEB3215	Wong et al., 2015
104	ERR326674	Laos	Southeast Asia	3.4	#fdbf6f	2010	9953_5_78	SAMEA2056536	GCA_001099925.1	9953_5#78	CJYU01	PRJEB3215	Wong et al., 2015
105	ERR331350	Laos	Southeast Asia	3.4	#fdbf6f	2004	10060_6_53	SAMEA2055261	GCA_001082705.1	10060_6#53	CIPE01	PRJEB3215	Wong et al., 2015
106	ERR326671	Laos	Southeast Asia	3.4	#fdbf6f	2010	9953_5_75	SAMEA2056535	GCA_001124985.1	9953_5#75	CJYT01	PRJEB3215	Wong et al., 2015
107	ERR326667	Laos	Southeast Asia	3.4	#fdbf6f	2010	9953_5_71	SAMEA2057368	GCA_001132605.1	9953_5#71	CJYQ01	PRJEB3215	Wong et al., 2015
108	ERR5201167	India	South Asia	3.2.2	#b2df8a	2018-04-03	Z10058	SAMEA7883632	N/A	N/A	N/A	PRJEB42715	da Silva et al., 2022
109	ERR4303851	Bangladesh	South Asia	3.2.2	#b2df8a	2017-08-29	29955_4#121	SAMEA5595535	N/A	N/A	N/A	PRJEB30334	da Silva et al., 2022
110	ERR4326058	Bangladesh	South Asia	3.2.2	#b2df8a	2017-10-09	29999_5#231	SAMEA5596519	N/A	N/A	N/A	PRJEB30334	da Silva et al., 2022
111	ERR4325946	Bangladesh	South Asia	3.2.2	#b2df8a	2018-01-15	29999_5#117	SAMEA5596394	N/A	N/A	N/A	PRJEB30334	da Silva et al., 2022
112	ERR4303779	Bangladesh	South Asia	3.2.2	#b2df8a	2017-06-24	29955_4#49	SAMEA5595631	N/A	N/A	N/A	PRJEB30334	da Silva et al., 2022
113	ERR4303771	Bangladesh	South Asia	3.2.2	#b2df8a	2017-07-03	29955_4#41	SAMEA5595629	N/A	N/A	N/A	PRJEB30334	da Silva et al., 2022
114	ERR4362645	Bangladesh	South Asia	3.2.2	#b2df8a	2017-02-06	30134_1#314	SAMEA5596111	N/A	N/A	N/A	PRJEB30334	da Silva et al., 2022
115	ERR4304083	Bangladesh	South Asia	3.2.2	#b2df8a	2017-12-21	29955_4#354	SAMEA5595809	N/A	N/A	N/A	PRJEB30334	da Silva et al., 2022
116	ERR4362334	Bangladesh	South Asia	3.2.2	#b2df8a	2016-10-23	30134_1#3	SAMEA5596130	N/A	N/A	N/A	PRJEB30334	da Silva et al., 2022
117	ERR4326148	Bangladesh	South Asia	3.2.2	#b2df8a	2018-03-24	29999_5#323	SAMEA5596354	N/A	N/A	N/A	PRJEB30334	da Silva et al., 2022
118	ERR4303839	Bangladesh	South Asia	3.2.2	#b2df8a	2017-08-29	29955_4#109	SAMEA5595532	N/A	N/A	N/A	PRJEB30334	da Silva et al., 2022
119	ERR4325941	Bangladesh	South Asia	3.2.2	#b2df8a	2018-04-19	29999_5#112	SAMEA5596296	N/A	N/A	N/A	PRJEB30334	da Silva et al., 2022
120	ERR4303767	Bangladesh	South Asia	3.2.2	#b2df8a	2017-06-14	29955_4#37	SAMEA5595628	N/A	N/A	N/A	PRJEB30334	da Silva et al., 2022
121	ERR4362472	Bangladesh	South Asia	3.2.2	#b2df8a	2017-07-31	30134_1#141	SAMEA5595602	N/A	N/A	N/A	PRJEB30334	da Silva et al., 2022
122	ERR4304057	Bangladesh	South Asia	3.2.2	#b2df8a	2017-07-11	29955_4#328	SAMEA5595588	N/A	N/A	N/A	PRJEB30334	da Silva et al., 2022
123	ERR4303888	Bangladesh	South Asia	3.2.2	#b2df8a	2017-05-02	29955_4#158	SAMEA5595658	N/A	N/A	N/A	PRJEB30334	da Silva et al., 2022
124	ERR4362536	Bangladesh	South Asia	3.2.2	#b2df8a	2017-02-27	30134_1#205	SAMEA5596080	N/A	N/A	N/A	PRJEB30334	da Silva et al., 2022
125	ERR4303852	Bangladesh	South Asia	3.2.2	#b2df8a	2017-08-05	29955_4#122	SAMEA5595649	N/A	N/A	N/A	PRJEB30334	da Silva et al., 2022
126	ERR4303775	Bangladesh	South Asia	3.2.2	#b2df8a	2017-06-18	29955_4#45	SAMEA5595630	N/A	N/A	N/A	PRJEB30334	da Silva et al., 2022
127	ERR4303919	Bangladesh	South Asia	3.2.2	#b2df8a	2017-09-03	29955_4#190	SAMEA5595558	N/A	N/A	N/A	PRJEB30334	da Silva et al., 2022
128	ERR4303993	Bangladesh	South Asia	3.2.2	#b2df8a	2016-11-28	29955_4#264	SAMEA5595684	N/A	N/A	N/A	PRJEB30334	da Silva et al., 2022
129	ERR4303981	Bangladesh	South Asia	3.2.2	#b2df8a	2016-11-19	29955_4#252	SAMEA5595681	N/A	N/A	N/A	PRJEB30334	da Silva et al., 2022
130	ERR4362676	Bangladesh	South Asia	3.2.2	#b2df8a	2017-08-10	30134_1#345	SAMEA5595905	N/A	N/A	N/A	PRJEB30334	da Silva et al., 2022
131	ERR4362710	Bangladesh	South Asia	3.2.2	#b2df8a	2016-10-16	30134_1#379	SAMEA5596023	N/A	N/A	N/A	PRJEB30334	da Silva et al., 2022
132	ERR4326007	Bangladesh	South Asia	3.2.2	#b2df8a	2018-06-10	29999_5#179	SAMEA5596209	N/A	N/A	N/A	PRJEB30334	da Silva et al., 2022
133	ERR4303957	Bangladesh	South Asia	3.2.2	#b2df8a	2017-03-30	29955_4#228	SAMEA5595675	N/A	N/A	N/A	PRJEB30334	da Silva et al., 2022
134	ERR4362674	Bangladesh	South Asia	3.2.2	#b2df8a	2017-02-27	30134_1#343	SAMEA5596119	N/A	N/A	N/A	PRJEB30334	da Silva et al., 2022
135	ERR4326025	Bangladesh	South Asia	3.2.2	#b2df8a	2018-04-05	29999_5#197	SAMEA5596318	N/A	N/A	N/A	PRJEB30334	da Silva et al., 2022
136	ERR4303964	Bangladesh	South Asia	3.2.2	#b2df8a	2017-07-05	29955_4#235	SAMEA5595572	N/A	N/A	N/A	PRJEB30334	da Silva et al., 2022
137	ERR4362540	Bangladesh	South Asia	3.2.2	#b2df8a	2017-04-11	30134_1#209	SAMEA5596081	N/A	N/A	N/A	PRJEB30334	da Silva et al., 2022
138	ERR4303759	Bangladesh	South Asia	3.2.2	#b2df8a	2017-06-15	29955_4#29	SAMEA5595626	N/A	N/A	N/A	PRJEB30334	da Silva et al., 2022
139	ERR4326157	Bangladesh	South Asia	3.2.2	#b2df8a	2018-02-27	29999_5#332	SAMEA5596357	N/A	N/A	N/A	PRJEB30334	da Silva et al., 2022
140	ERR4326042	Bangladesh	South Asia	3.2.2	#b2df8a	2017-12-21	29999_5#214	SAMEA5596418	N/A	N/A	N/A	PRJEB30334	da Silva et al., 2022
141	ERR4362692	Bangladesh	South Asia	3.2.2	#b2df8a	2018-07-30	30134_1#361	SAMEA5596158	N/A	N/A	N/A	PRJEB30334	da Silva et al., 2022
142	ERR4325966	Bangladesh	South Asia	3.2.2	#b2df8a	2018-01-28	29999_5#137	SAMEA5596399	N/A	N/A	N/A	PRJEB30334	da Silva et al., 2022
143	ERR4325993	Bangladesh	South Asia	3.2.2	#b2df8a	2018-03-10	29999_5#164	SAMEA5596309	N/A	N/A	N/A	PRJEB30334	da Silva et al., 2022
144	ERR4325954	Bangladesh	South Asia	3.2.2	#b2df8a	2018-01-10	29999_5#125	SAMEA5596396	N/A	N/A	N/A	PRJEB30334	da Silva et al., 2022
145	ERR4325938	Bangladesh	South Asia	3.2.2	#b2df8a	2018-01-09	29999_5#109	SAMEA5596392	N/A	N/A	N/A	PRJEB30334	da Silva et al., 2022
146	ERR4303819	Bangladesh	South Asia	3.2.2	#b2df8a	2017-04-26	29955_4#89	SAMEA5595641	N/A	N/A	N/A	PRJEB30334	da Silva et al., 2022
147	ERR4362387	Bangladesh	South Asia	3.2.2	#b2df8a	2018-04-10	30134_1#56	SAMEA5596256	N/A	N/A	N/A	PRJEB30334	da Silva et al., 2022
148	ERR4362395	Bangladesh	South Asia	3.2.2	#b2df8a	2018-05-06	30134_1#64	SAMEA5596262	N/A	N/A	N/A	PRJEB30334	da Silva et al., 2022
149	ERR4362581	Bangladesh	South Asia	3.2.2	#b2df8a	2017-05-22	30134_1#250	SAMEA5596093	N/A	N/A	N/A	PRJEB30334	da Silva et al., 2022
150	ERR4325862	Bangladesh	South Asia	3.2.2	#b2df8a	2017-11-09	29999_5#33	SAMEA5596469	N/A	N/A	N/A	PRJEB30334	da Silva et al., 2022
151	ERR4362485	Bangladesh	South Asia	3.2.2	#b2df8a	2017-04-20	30134_1#154	SAMEA5595611	N/A	N/A	N/A	PRJEB30334	da Silva et al., 2022
152	ERR4362378	Bangladesh	South Asia	3.2.2	#b2df8a	2018-01-24	30134_1#47	SAMEA5596037	N/A	N/A	N/A	PRJEB30334	da Silva et al., 2022
153	ERR4326043	Bangladesh	South Asia	3.2.2	#b2df8a	2017-09-21	29999_5#215	SAMEA5596515	N/A	N/A	N/A	PRJEB30334	da Silva et al., 2022
154	ERR4362713	Bangladesh	South Asia	3.2.2	#b2df8a	2017-08-24	30134_1#382	SAMEA5595914	N/A	N/A	N/A	PRJEB30334	da Silva et al., 2022
155	ERR4326088	Bangladesh	South Asia	3.2.2	#b2df8a	2018-04-04	29999_5#261	SAMEA5596334	N/A	N/A	N/A	PRJEB30334	da Silva et al., 2022
156	ERR4325869	Bangladesh	South Asia	3.2.2	#b2df8a	2018-02-14	29999_5#40	SAMEA5596374	N/A	N/A	N/A	PRJEB30334	da Silva et al., 2022
157	ERR4362691	Bangladesh	South Asia	3.2.2	#b2df8a	2017-10-12	30134_1#360	SAMEA5596157	N/A	N/A	N/A	PRJEB30334	da Silva et al., 2022
158	ERR4325880	Bangladesh	South Asia	3.2.2	#b2df8a	2018-05-12	29999_5#51	SAMEA5596281	N/A	N/A	N/A	PRJEB30334	da Silva et al., 2022
159	ERR4325987	Bangladesh	South Asia	3.2.2	#b2df8a	2017-10-22	29999_5#158	SAMEA5596500	N/A	N/A	N/A	PRJEB30334	da Silva et al., 2022
160	ERR4326125	Bangladesh	South Asia	3.2.2	#b2df8a	2018-04-23	29999_5#298	SAMEA5596242	N/A	N/A	N/A	PRJEB30334	da Silva et al., 2022
161	ERR4325994	Bangladesh	South Asia	3.2.2	#b2df8a	2017-12-18	29999_5#165	SAMEA5596406	N/A	N/A	N/A	PRJEB30334	da Silva et al., 2022
162	ERR4362405	Bangladesh	South Asia	3.2.2	#b2df8a	2017-11-11	30134_1#74	SAMEA5595836	N/A	N/A	N/A	PRJEB30334	da Silva et al., 2022
163	ERR4362493	Bangladesh	South Asia	3.2.2	#b2df8a	2017-05-07	30134_1#162	SAMEA5595616	N/A	N/A	N/A	PRJEB30334	da Silva et al., 2022
164	ERR4326018	Bangladesh	South Asia	3.2.2	#b2df8a	2017-11-30	29999_5#190	SAMEA5596412	N/A	N/A	N/A	PRJEB30334	da Silva et al., 2022
165	ERR4325896	Bangladesh	South Asia	3.2.2	#b2df8a	2018-04-02	29999_5#67	SAMEA5596285	N/A	N/A	N/A	PRJEB30334	da Silva et al., 2022
166	ERR4303962	Bangladesh	South Asia	3.2.2	#b2df8a	2018-04-03	29955_4#233	SAMEA5595776	N/A	N/A	N/A	PRJEB30334	da Silva et al., 2022
167	ERR4325978	Bangladesh	South Asia	3.2.2	#b2df8a	2018-02-03	29999_5#149	SAMEA5596402	N/A	N/A	N/A	PRJEB30334	da Silva et al., 2022
168	ERR4326001	Bangladesh	South Asia	3.2.2	#b2df8a	2017-12-03	29999_5#173	SAMEA5596408	N/A	N/A	N/A	PRJEB30334	da Silva et al., 2022
169	ERR4304006	Bangladesh	South Asia	3.2.2	#b2df8a	2018-03-24	29955_4#277	SAMEA5595787	N/A	N/A	N/A	PRJEB30334	da Silva et al., 2022
170	ERR4362456	Bangladesh	South Asia	3.2.2	#b2df8a	2017-07-09	30134_1#125	SAMEA5595566	N/A	N/A	N/A	PRJEB30334	da Silva et al., 2022
171	ERR4325934	Bangladesh	South Asia	3.2.2	#b2df8a	2018-01-10	29999_5#105	SAMEA5596391	N/A	N/A	N/A	PRJEB30334	da Silva et al., 2022
172	ERR4326159	Bangladesh	South Asia	3.2.2	#b2df8a	2018-04-28	29999_5#334	SAMEA5596258	N/A	N/A	N/A	PRJEB30334	da Silva et al., 2022
173	ERR4326084	Bangladesh	South Asia	3.2.2	#b2df8a	2018-03-12	29999_5#257	SAMEA5596333	N/A	N/A	N/A	PRJEB30334	da Silva et al., 2022
174	ERR4326011	Bangladesh	South Asia	3.2.2	#b2df8a	2017-10-24	29999_5#183	SAMEA5596507	N/A	N/A	N/A	PRJEB30334	da Silva et al., 2022
175	ERR4326087	Bangladesh	South Asia	3.2.2	#b2df8a	2018-06-02	29999_5#260	SAMEA5596229	N/A	N/A	N/A	PRJEB30334	da Silva et al., 2022
176	ERR4325849	Bangladesh	South Asia	3.2.2	#b2df8a	2018-01-28	29999_5#20	SAMEA5596364	N/A	N/A	N/A	PRJEB30334	da Silva et al., 2022
177	ERR4326137	Bangladesh	South Asia	3.2.2	#b2df8a	2018-02-26	29999_5#311	SAMEA5596350	N/A	N/A	N/A	PRJEB30334	da Silva et al., 2022
178	ERR4362658	Bangladesh	South Asia	3.2.2	#b2df8a	2018-07-11	30134_1#327	SAMEA5596149	N/A	N/A	N/A	PRJEB30334	da Silva et al., 2022
179	ERR4362452	Bangladesh	South Asia	3.2.2	#b2df8a	2017-07-04	30134_1#121	SAMEA5595565	N/A	N/A	N/A	PRJEB30334	da Silva et al., 2022
180	ERR4362680	Bangladesh	South Asia	3.2.2	#b2df8a	2017-08-10	30134_1#349	SAMEA5595906	N/A	N/A	N/A	PRJEB30334	da Silva et al., 2022
181	ERR4325958	Bangladesh	South Asia	3.2.2	#b2df8a	2018-01-10	29999_5#129	SAMEA5596397	N/A	N/A	N/A	PRJEB30334	da Silva et al., 2022
182	ERR4326072	Bangladesh	South Asia	3.2.2	#b2df8a	2018-03-29	29999_5#245	SAMEA5596330	N/A	N/A	N/A	PRJEB30334	da Silva et al., 2022
183	ERR4326004	Bangladesh	South Asia	3.2.2	#b2df8a	2018-03-10	29999_5#176	SAMEA5596312	N/A	N/A	N/A	PRJEB30334	da Silva et al., 2022
184	ERR4326156	Bangladesh	South Asia	3.2.2	#b2df8a	2018-04-19	29999_5#331	SAMEA5596257	N/A	N/A	N/A	PRJEB30334	da Silva et al., 2022
185	ERR4325935	Bangladesh	South Asia	3.2.2	#b2df8a	2017-10-28	29999_5#106	SAMEA5596487	N/A	N/A	N/A	PRJEB30334	da Silva et al., 2022
186	ERR4304093	Bangladesh	South Asia	3.2.2	#b2df8a	2017-05-02	29955_4#364	SAMEA5595610	N/A	N/A	N/A	PRJEB30334	da Silva et al., 2022
187	ERR4303944	Bangladesh	South Asia	3.2.2	#b2df8a	2017-07-08	29955_4#215	SAMEA5595567	N/A	N/A	N/A	PRJEB30334	da Silva et al., 2022
188	ERR4325897	Bangladesh	South Asia	3.2.2	#b2df8a	2017-12-31	29999_5#68	SAMEA5596381	N/A	N/A	N/A	PRJEB30334	da Silva et al., 2022
189	ERR4325901	Bangladesh	South Asia	3.2.2	#b2df8a	2018-01-07	29999_5#72	SAMEA5596382	N/A	N/A	N/A	PRJEB30334	da Silva et al., 2022
190	ERR4325886	Bangladesh	South Asia	3.2.2	#b2df8a	2017-11-05	29999_5#57	SAMEA5596475	N/A	N/A	N/A	PRJEB30334	da Silva et al., 2022
191	ERR4362647	Bangladesh	South Asia	3.2.2	#b2df8a	2017-10-02	30134_1#316	SAMEA5595897	N/A	N/A	N/A	PRJEB30334	da Silva et al., 2022
192	ERR4326178	Bangladesh	South Asia	3.2.2	#b2df8a	2018-01-22	29999_5#353	SAMEA5596359	N/A	N/A	N/A	PRJEB30334	da Silva et al., 2022
193	ERR4326085	Bangladesh	South Asia	3.2.2	#b2df8a	2017-11-19	29999_5#258	SAMEA5596429	N/A	N/A	N/A	PRJEB30334	da Silva et al., 2022
194	ERR4304113	Bangladesh	South Asia	3.2.2	#b2df8a	2017-04-23	29955_4#384	SAMEA5595618	N/A	N/A	N/A	PRJEB30334	da Silva et al., 2022
195	ERR4325854	Bangladesh	South Asia	3.2.2	#b2df8a	2017-11-08	29999_5#25	SAMEA5596467	N/A	N/A	N/A	PRJEB30334	da Silva et al., 2022
196	ERR4303984	Bangladesh	South Asia	3.2.2	#b2df8a	2017-08-07	29955_4#255	SAMEA5595578	N/A	N/A	N/A	PRJEB30334	da Silva et al., 2022
197	ERR4304105	Bangladesh	South Asia	3.2.2	#b2df8a	2017-05-04	29955_4#376	SAMEA5595615	N/A	N/A	N/A	PRJEB30334	da Silva et al., 2022
198	ERR4325996	Bangladesh	South Asia	3.2.2	#b2df8a	2018-03-05	29999_5#168	SAMEA5596310	N/A	N/A	N/A	PRJEB30334	da Silva et al., 2022
199	ERR4326173	Bangladesh	South Asia	3.2.2	#b2df8a	2017-08-07	29999_5#348	SAMEA5596458	N/A	N/A	N/A	PRJEB30334	da Silva et al., 2022
200	ERR4303868	Bangladesh	South Asia	3.2.2	#b2df8a	2017-05-31	29955_4#138	SAMEA5595653	N/A	N/A	N/A	PRJEB30334	da Silva et al., 2022
201	ERR4362409	Bangladesh	South Asia	3.2.2	#b2df8a	2017-10-29	30134_1#78	SAMEA5595837	N/A	N/A	N/A	PRJEB30334	da Silva et al., 2022
202	ERR4304039	Bangladesh	South Asia	3.2.2	#b2df8a	2018-01-29	29955_4#310	SAMEA5595795	N/A	N/A	N/A	PRJEB30334	da Silva et al., 2022
203	ERR4303803	Bangladesh	South Asia	3.2.2	#b2df8a	2017-04-30	29955_4#73	SAMEA5595637	N/A	N/A	N/A	PRJEB30334	da Silva et al., 2022
204	SRR5974898	Bangladesh	South Asia	3.2	#b2df8a	2016	SRR5974898	SAMN07557078	GCA_009476725.1	PDT000236554.2	AAMSXH01	PRJNA248792	Ingle et al., 2019
205	ERR1788775	India	South Asia	3.2	#b2df8a	1994	21052_3_39	SAMEA4384703	GCA_010249815.1	PDT000446854.1	DAAPRV01	PRJNA514245	Pragasam et al., 2020
206	ERR1788774	India	South Asia	3.2	#b2df8a	1994	21052_3_38	SAMEA4384554	GCA_010249745.1	PDT000446853.1	DAAPRJ01	PRJNA514245	Pragasam et al., 2020
207	ERR1788777	India	South Asia	3.2	#b2df8a	1995	21052_3_41	SAMEA4384816	GCA_010250555.1	PDT000446856.1	DAAPRQ01	PRJNA514245	Pragasam et al., 2020
208	ERR1788776	India	South Asia	3.2	#b2df8a	1994	21052_3_40	SAMEA4384555	GCA_010249555.1	PDT000446855.1	DAAPRA01	PRJNA514245	Pragasam et al., 2020
209	ERR4303743	Bangladesh	South Asia	3.2.2	#b2df8a	2017-04-09	29955_4#13	SAMEA5595622	N/A	N/A	N/A	PRJEB30334	da Silva et al., 2022
210	AL513382	Vietnam	South Asia	3.2.1	#b2df8a	1993	CT18	SAMEA1705914	GCA_000195995.1	N/A	AL513382.1	PRJNA236	Parkhill et al., 2001
211	ERR5201332	India	South Asia	3.2.1	#b2df8a	2017-12-09	Z10016	SAMEA7883490	N/A	N/A	N/A	PRJEB42715	da Silva et al., 2022
212	ERR4992817	India	South Asia	3.2.1	#b2df8a	2018-04-27	G10035	SAMEA5779582	N/A	N/A	N/A	PRJEB42715	da Silva et al., 2022
213	ERR4304030	Bangladesh	South Asia	3.2.2	#b2df8a	2017-01-08	29955_4#301	SAMEA5595694	N/A	N/A	N/A	PRJEB30334	da Silva et al., 2022
214	ERR4362554	Bangladesh	South Asia	3.2.2	#b2df8a	2017-09-12	30134_1#223	SAMEA5595873	N/A	N/A	N/A	PRJEB30334	da Silva et al., 2022
215	ERR4326091	Bangladesh	South Asia	3.2.2	#b2df8a	2018-05-15	29999_5#264	SAMEA5596230	N/A	N/A	N/A	PRJEB30334	da Silva et al., 2022
216	ERR4325918	Bangladesh	South Asia	3.2.2	#b2df8a	2017-10-22	29999_5#89	SAMEA5596483	N/A	N/A	N/A	PRJEB30334	da Silva et al., 2022
217	ERR4303840	Bangladesh	South Asia	3.2.2	#b2df8a	2017-05-03	29955_4#110	SAMEA5595646	N/A	N/A	N/A	PRJEB30334	da Silva et al., 2022
218	ERR4362528	Bangladesh	South Asia	3.2.2	#b2df8a	2017-01-25	30134_1#197	SAMEA5596078	N/A	N/A	N/A	PRJEB30334	da Silva et al., 2022
219	ERR4362666	Bangladesh	South Asia	3.2.2	#b2df8a	2017-03-16	30134_1#335	SAMEA5596116	N/A	N/A	N/A	PRJEB30334	da Silva et al., 2022
220	ERR4304097	Bangladesh	South Asia	3.2.2	#b2df8a	2017-05-02	29955_4#368	SAMEA5595613	N/A	N/A	N/A	PRJEB30334	da Silva et al., 2022
221	ERR4362715	Bangladesh	South Asia	3.2.2	#b2df8a	2017-03-19	30134_1#384	SAMEA5596129	N/A	N/A	N/A	PRJEB30334	da Silva et al., 2022
222	ERR4362649	Bangladesh	South Asia	3.2.2	#b2df8a	2017-03-01	30134_1#318	SAMEA5596112	N/A	N/A	N/A	PRJEB30334	da Silva et al., 2022
223	ERR4325865	Bangladesh	South Asia	3.2.2	#b2df8a	2018-02-14	29999_5#36	SAMEA5596368	N/A	N/A	N/A	PRJEB30334	da Silva et al., 2022
224	ERR4326002	Bangladesh	South Asia	3.2.2	#b2df8a	2017-11-01	29999_5#174	SAMEA5596505	N/A	N/A	N/A	PRJEB30334	da Silva et al., 2022
225	ERR4304001	Bangladesh	South Asia	3.2.2	#b2df8a	2016-12-07	29955_4#272	SAMEA5595686	N/A	N/A	N/A	PRJEB30334	da Silva et al., 2022
226	ERR4362616	Bangladesh	South Asia	3.2.2	#b2df8a	2017-01-07	30134_1#285	SAMEA5595993	N/A	N/A	N/A	PRJEB30334	da Silva et al., 2022
227	ERR4362621	Bangladesh	South Asia	3.2.2	#b2df8a	2017-06-21	30134_1#290	SAMEA5596104	N/A	N/A	N/A	PRJEB30334	da Silva et al., 2022
228	ERR4303751	Bangladesh	South Asia	3.2.2	#b2df8a	2017-04-23	29955_4#21	SAMEA5595624	N/A	N/A	N/A	PRJEB30334	da Silva et al., 2022
229	ERR4325843	Bangladesh	South Asia	3.2.2	#b2df8a	2018-07-22	29999_5#14	SAMEA5596167	N/A	N/A	N/A	PRJEB30334	da Silva et al., 2022
230	SRR5982995	No Travel Reported	Unknown	3	#ffffff	2016	SRR5982995	SAMN07566693	GCA_009477825.1	PDT000237314.2	AAMSZW01	PRJNA248792	Ingle et al., 2019
231	ERR357473	Fiji	Oceania	3	#ffff99	1984	10541_2_48	SAMEA2154393	GCA_001110445.1	10541_2#48	CJEQ01	PRJEB3215	Wong et al., 2015
232	ERR4362563	Bangladesh	South Asia	3.2.2	#b2df8a	2017-02-12	30134_1#232	SAMEA5595976	N/A	N/A	N/A	PRJEB30334	da Silva et al., 2022
233	ERR4303932	Bangladesh	South Asia	3.2.2	#b2df8a	2017-04-26	29955_4#203	SAMEA5595669	N/A	N/A	N/A	PRJEB30334	da Silva et al., 2022
234	ERR4303924	Bangladesh	South Asia	3.2.2	#b2df8a	2017-04-25	29955_4#195	SAMEA5595667	N/A	N/A	N/A	PRJEB30334	da Silva et al., 2022
235	ERR2663969	Bangladesh	South Asia	3	#b2df8a	2007	343078_276146	SAMEA4759557	N/A	N/A	N/A	PRJEB27394	Tanmoy et al 2018
236	ERR2663887	Bangladesh	South Asia	3	#b2df8a	2009	343078_224187	SAMEA4759475	N/A	N/A	N/A	PRJEB27394	Tanmoy et al 2018
237	ERR4362657	Bangladesh	South Asia	3.2.2	#b2df8a	2017-03-11	30134_1#326	SAMEA5596114	N/A	N/A	N/A	PRJEB30334	da Silva et al., 2022
238	ERR4362619	Bangladesh	South Asia	3.2.2	#b2df8a	2017-09-12	30134_1#288	SAMEA5595890	N/A	N/A	N/A	PRJEB30334	da Silva et al., 2022
239	ERR4304025	Bangladesh	South Asia	3.2.2	#b2df8a	2017-01-02	29955_4#296	SAMEA5595692	N/A	N/A	N/A	PRJEB30334	da Silva et al., 2022
240	ERR4325842	Bangladesh	South Asia	3.2.2	#b2df8a	2017-10-29	29999_5#13	SAMEA5596464	N/A	N/A	N/A	PRJEB30334	da Silva et al., 2022
241	ERR4362510	Bangladesh	South Asia	3.2.2	#b2df8a	2017-10-11	30134_1#179	SAMEA5595862	N/A	N/A	N/A	PRJEB30334	da Silva et al., 2022
242	ERR4325975	Bangladesh	South Asia	3.2.2	#b2df8a	2017-10-18	29999_5#146	SAMEA5596497	N/A	N/A	N/A	PRJEB30334	da Silva et al., 2022
243	ERR4303872	Bangladesh	South Asia	3.2.2	#b2df8a	2017-08-30	29955_4#142	SAMEA5595654	N/A	N/A	N/A	PRJEB30334	da Silva et al., 2022
244	ERR4326104	Bangladesh	South Asia	3.2.2	#b2df8a	2018-06-04	29999_5#277	SAMEA5596235	N/A	N/A	N/A	PRJEB30334	da Silva et al., 2022
245	ERR4325839	Bangladesh	South Asia	3.2.2	#b2df8a	2016-10-06	29999_5#10	SAMEA5596166	N/A	N/A	N/A	PRJEB30334	da Silva et al., 2022
246	ERR4303756	Bangladesh	South Asia	3.2.2	#b2df8a	2018-06-14	29955_4#26	SAMEA5595722	N/A	N/A	N/A	PRJEB30334	da Silva et al., 2022
247	ERR4325837	Bangladesh	South Asia	3.2.2	#b2df8a	2018-01-29	29999_5#8	SAMEA5596361	N/A	N/A	N/A	PRJEB30334	da Silva et al., 2022
248	ERR4362365	Bangladesh	South Asia	3.2.2	#b2df8a	2018-03-15	30134_1#34	SAMEA5596033	N/A	N/A	N/A	PRJEB30334	da Silva et al., 2022
249	ERR4326080	Bangladesh	South Asia	3.2.2	#b2df8a	2018-03-24	29999_5#253	SAMEA5596332	N/A	N/A	N/A	PRJEB30334	da Silva et al., 2022
250	ERR4362383	Bangladesh	South Asia	3.2.2	#b2df8a	2018-04-19	30134_1#52	SAMEA5596254	N/A	N/A	N/A	PRJEB30334	da Silva et al., 2022
251	ERR4326118	Bangladesh	South Asia	3.2.2	#b2df8a	2017-11-29	29999_5#291	SAMEA5596439	N/A	N/A	N/A	PRJEB30334	da Silva et al., 2022
252	ERR4325947	Bangladesh	South Asia	3.2.2	#b2df8a	2017-10-21	29999_5#118	SAMEA5596490	N/A	N/A	N/A	PRJEB30334	da Silva et al., 2022
253	ERR4326041	Bangladesh	South Asia	3.2.2	#b2df8a	2018-03-13	29999_5#213	SAMEA5596322	N/A	N/A	N/A	PRJEB30334	da Silva et al., 2022
254	ERR4362433	Bangladesh	South Asia	3.2.2	#b2df8a	2017-11-29	30134_1#102	SAMEA5595847	N/A	N/A	N/A	PRJEB30334	da Silva et al., 2022
255	ERR4326006	Bangladesh	South Asia	3.2.2	#b2df8a	2017-11-01	29999_5#178	SAMEA5596506	N/A	N/A	N/A	PRJEB30334	da Silva et al., 2022
256	ERR4325861	Bangladesh	South Asia	3.2.2	#b2df8a	2018-02-11	29999_5#32	SAMEA5596367	N/A	N/A	N/A	PRJEB30334	da Silva et al., 2022
257	ERR4326113	Bangladesh	South Asia	3.2.2	#b2df8a	2018-04-22	29999_5#286	SAMEA5596238	N/A	N/A	N/A	PRJEB30334	da Silva et al., 2022
258	ERR4326044	Bangladesh	South Asia	3.2.2	#b2df8a	2018-06-25	29999_5#216	SAMEA5596218	N/A	N/A	N/A	PRJEB30334	da Silva et al., 2022
259	ERR4303891	Bangladesh	South Asia	3.2.2	#b2df8a	2017-08-20	29955_4#161	SAMEA5595548	N/A	N/A	N/A	PRJEB30334	da Silva et al., 2022
260	ERR4362396	Bangladesh	South Asia	3.2.2	#b2df8a	2018-05-19	30134_1#65	SAMEA5596264	N/A	N/A	N/A	PRJEB30334	da Silva et al., 2022
261	ERR4325895	Bangladesh	South Asia	3.2.2	#b2df8a	2018-07-04	29999_5#66	SAMEA5596181	N/A	N/A	N/A	PRJEB30334	da Silva et al., 2022
262	ERR4303812	Bangladesh	South Asia	3.2.2	#b2df8a	2018-05-21	29955_4#82	SAMEA5595736	N/A	N/A	N/A	PRJEB30334	da Silva et al., 2022
263	ERR2663870	Bangladesh	South Asia	3	#b2df8a	2006	343078_206161	SAMEA4759458	N/A	N/A	N/A	PRJEB27394	Tanmoy et al 2018
264	ERR360696	Indonesia	Southeast Asia	3.5	#fdbf6f	2000	10593_2_83	SAMEA1930187	GCA_001097165.1	10593_2#83	CJLM01	PRJEB3215	Wong et al., 2015
265	ERR349390	Vietnam	Southeast Asia	3.5	#fdbf6f	1993	10425_1_60	SAMEA2148604	GCA_001242365.1	10425_1#60	CUZC01	PRJEB3215	Wong et al., 2015
266	ERR352311	Fiji	Oceania	3.5	#ffff99	1991	10492_1_58	SAMEA2156166	GCA_001366255.1	10492_1#58	CGTQ01	PRJEB3215	Wong et al., 2015
267	ERR213262	Fiji	Oceania	3.5	#ffff99	1996	8490_6_44	SAMEA1572842	GCA_001356215.1	8490_6#44	CEZX01	PRJEB3215	Wong et al., 2015
268	ERR4362695	Bangladesh	South Asia	3.2.2	#b2df8a	2017-12-26	30134_1#364	SAMEA5596124	N/A	N/A	N/A	PRJEB30334	da Silva et al., 2022
269	ERR4362488	Bangladesh	South Asia	3.2.2	#b2df8a	2017-04-23	30134_1#157	SAMEA5596067	N/A	N/A	N/A	PRJEB30334	da Silva et al., 2022
270	ERR4325874	Bangladesh	South Asia	3.2.2	#b2df8a	2017-11-13	29999_5#45	SAMEA5596472	N/A	N/A	N/A	PRJEB30334	da Silva et al., 2022
271	ERR4362659	Bangladesh	South Asia	3.2.2	#b2df8a	2017-08-09	30134_1#328	SAMEA5595900	N/A	N/A	N/A	PRJEB30334	da Silva et al., 2022
272	ERR4362439	Bangladesh	South Asia	3.2.2	#b2df8a	2017-07-08	30134_1#108	SAMEA5596053	N/A	N/A	N/A	PRJEB30334	da Silva et al., 2022
273	ERR4362699	Bangladesh	South Asia	3.2.2	#b2df8a	2018-01-20	30134_1#368	SAMEA5596125	N/A	N/A	N/A	PRJEB30334	da Silva et al., 2022
274	ERR4362389	Bangladesh	South Asia	3.2.2	#b2df8a	2017-07-22	30134_1#58	SAMEA5595932	N/A	N/A	N/A	PRJEB30334	da Silva et al., 2022
275	ERR4362386	Bangladesh	South Asia	3.2.2	#b2df8a	2017-12-07	30134_1#55	SAMEA5596039	N/A	N/A	N/A	PRJEB30334	da Silva et al., 2022
276	ERR4303902	Bangladesh	South Asia	3.2.2	#b2df8a	2017-09-05	29955_4#173	SAMEA5595553	N/A	N/A	N/A	PRJEB30334	da Silva et al., 2022
277	ERR279153	Malawi	Southern Africa	3	#33a02c	2009	9475_6_56	SAMEA1903882	GCA_001125485.1	9475_6#56	CJTE01	PRJEB3215	Wong et al., 2015
278	ERR4325977	Bangladesh	South Asia	3.2.2	#b2df8a	2018-04-26	29999_5#148	SAMEA5596305	N/A	N/A	N/A	PRJEB30334	da Silva et al., 2022
279	ERR357609	Nepal	South Asia	3	#b2df8a	2011	#N/A	SAMEA2147606	GCA_001089985.1	10561_2#34	CJFM01	PRJEB3215	Wong et al., 2015
280	ERR4325905	Bangladesh	South Asia	3.2.2	#b2df8a	2017-12-31	29999_5#76	SAMEA5596383	N/A	N/A	N/A	PRJEB30334	da Silva et al., 2022
281	ERR4326169	Bangladesh	South Asia	3.2.2	#b2df8a	2018-02-03	29999_5#344	SAMEA5596372	N/A	N/A	N/A	PRJEB30334	da Silva et al., 2022
282	ERR6118183	India	South Asia	3.2.2	#b2df8a	2018-12-16	Z10132	SAMEA9253100	GCA_024941355.1	PDT001393574.1	DAIYAW01	PRJEB42715	da Silva et al., 2022
283	ERR4326172	Bangladesh	South Asia	3.2.2	#b2df8a	2018-02-04	29999_5#347	SAMEA5596373	N/A	N/A	N/A	PRJEB30334	da Silva et al., 2022
284	ERR279178	Malawi	Southern Africa	3	#33a02c	2005	9475_6_81	SAMEA1903909	GCA_001146145.1	9475_6#81	CJTZ01	PRJEB3215	Wong et al., 2015
285	ERR4325982	Bangladesh	South Asia	3.2.2	#b2df8a	2018-02-01	29999_5#153	SAMEA5596403	N/A	N/A	N/A	PRJEB30334	da Silva et al., 2022
286	ERR4303940	Bangladesh	South Asia	3.2.2	#b2df8a	2017-07-04	29955_4#211	SAMEA5595564	N/A	N/A	N/A	PRJEB30334	da Silva et al., 2022
287	ERR4362515	Bangladesh	South Asia	3.2.2	#b2df8a	2017-05-03	30134_1#184	SAMEA5595963	N/A	N/A	N/A	PRJEB30334	da Silva et al., 2022
288	ERR4303876	Bangladesh	South Asia	3.2.2	#b2df8a	2017-09-04	29955_4#146	SAMEA5595655	N/A	N/A	N/A	PRJEB30334	da Silva et al., 2022
289	ERR4326059	Bangladesh	South Asia	3.2.2	#b2df8a	2018-06-12	29999_5#232	SAMEA5596222	N/A	N/A	N/A	PRJEB30334	da Silva et al., 2022
290	ERR4303835	Bangladesh	South Asia	3.2.2	#b2df8a	2017-08-15	29955_4#105	SAMEA5595531	N/A	N/A	N/A	PRJEB30334	da Silva et al., 2022
291	ERR357603	Nepal	South Asia	3	#b2df8a	2011	10561_2_28	SAMEA2149622	GCA_001153265.1	10561_2#28	CJFH01	PRJEB3215	Wong et al., 2015
292	ERR4326064	Bangladesh	South Asia	3.2.2	#b2df8a	2018-03-25	29999_5#237	SAMEA5596328	N/A	N/A	N/A	PRJEB30334	da Silva et al., 2022
293	ERR4325859	Bangladesh	South Asia	3.2.2	#b2df8a	2018-07-26	29999_5#30	SAMEA5596172	N/A	N/A	N/A	PRJEB30334	da Silva et al., 2022
294	ERR2663542	Bangladesh	South Asia	3	#b2df8a	2006	311189_267103	SAMEA4759129	N/A	N/A	N/A	PRJEB27394	Tanmoy et al 2018
295	ERR352945	Indonesia	Southeast Asia	3	#fdbf6f	2011	10541_2_12	SAMEA2160925	GCA_001367755.1	10541_2#12	CVLK01	PRJEB3215	Wong et al., 2015
296	ERR352260	Malaysia	Southeast Asia	3	#fdbf6f	2011	10492_1_7	SAMEA2162095	GCA_001093585.1	10492_1#7	CJAS01	PRJEB3215	Wong et al., 2015
297	ERR331231	Indonesia	Southeast Asia	3	#fdbf6f	2010	10060_5_28	SAMEA2056807	GCA_001079365.1	10060_5#28	CINH01	PRJEB3215	Wong et al., 2015
298	ERR331248	Indonesia	Southeast Asia	3	#fdbf6f	2010	10060_5_45	SAMEA2058631	GCA_001081465.1	10060_5#45	CINI01	PRJEB3215	Wong et al., 2015
299	ERR326610	Indonesia	Southeast Asia	3	#fdbf6f	2008	9953_5_14	SAMEA2057243	GCA_001129105.1	9953_5#14	CJWU01	PRJEB3215	Wong et al., 2015
300	ERR331334	Laos	Southeast Asia	3	#fdbf6f	2003	10060_6_37	SAMEA1969027	GCA_001080385.1	10060_6#37	CIOM01	PRJEB3215	Wong et al., 2015
301	ERR360491	Comoros	East Asia	3	#bcbcbc	1999	10592_2_43	SAMEA1930162	GCA_001148045.1	10592_2#43	CJJJ01	PRJEB3215	Wong et al., 2015
302	ERR2663646	Bangladesh	South Asia	3	#b2df8a	2008	343076_226181	SAMEA4759234	N/A	N/A	N/A	PRJEB27394	Tanmoy et al 2018
303	ERR586807	Thailand	Southeast Asia	3	#fdbf6f	1986	13244_6_17	SAMEA2494174	N/A	N/A	N/A	PRJNA514245	Dyson et., 2017
304	ERR586811	Thailand	Southeast Asia	3	#fdbf6f	1986	13244_6_21	SAMEA2494181	N/A	N/A	N/A	PRJNA514245	Dyson et., 2017
305	ERR586804	Thailand	Southeast Asia	3	#fdbf6f	1986	13244_6_14	SAMEA2494165	N/A	N/A	N/A	PRJNA514245	Dyson et., 2017
306	ERR5311455	Nepal	South Asia	3.2.2	#b2df8a	2018-07-15	33253_3#267	SAMEA6264936	N/A	N/A	N/A	PRJEB30334	da Silva et al., 2022
307	ERR5376096	Nepal	South Asia	3.2.2	#b2df8a	2018-08-29	33308_1#268	SAMEA6265093	N/A	N/A	N/A	PRJEB30334	da Silva et al., 2022
308	ERR5375924	Nepal	South Asia	3.2.2	#b2df8a	2018-06-24	33308_1#41	SAMEA6264932	N/A	N/A	N/A	PRJEB30334	da Silva et al., 2022
309	ERR6294697	Nepal	South Asia	3.2.2	#b2df8a	2016-05-29	28832_1#362	SAMEA9404304	N/A	N/A	N/A	PRJEB30334	da Silva et al., 2022
310	ERR6294676	Nepal	South Asia	3.2.2	#b2df8a	2015-12-15	28832_1#310	SAMEA9404288	N/A	N/A	N/A	PRJEB30334	da Silva et al., 2022
311	ERR6294488	Nepal	South Asia	3.2.2	#b2df8a	2018-02-09	28632_6#281	SAMEA9404027	N/A	N/A	N/A	PRJEB30334	da Silva et al., 2022
312	ERR6294672	Nepal	South Asia	3.2.2	#b2df8a	2015-07-30	28832_1#302	SAMEA9404284	N/A	N/A	N/A	PRJEB30334	da Silva et al., 2022
313	ERR6294467	Nepal	South Asia	3.2.2	#b2df8a	2017-06-01	28632_6#243	SAMEA9404057	N/A	N/A	N/A	PRJEB30334	da Silva et al., 2022
314	ERR6294565	Nepal	South Asia	3.2.2	#b2df8a	2017-07-25	28832_1#19	SAMEA9404201	N/A	N/A	N/A	PRJEB30334	da Silva et al., 2022
315	ERR6294392	Nepal	South Asia	3.2.2	#b2df8a	2017-08-07	28632_6#52	SAMEA9404184	N/A	N/A	N/A	PRJEB30334	da Silva et al., 2022
316	ERR6294510	Nepal	South Asia	3.2.2	#b2df8a	2017-06-25	28632_6#321	SAMEA9404037	N/A	N/A	N/A	PRJEB30334	da Silva et al., 2022
317	ERR6294692	Nepal	South Asia	3.2.2	#b2df8a	2017-07-10	28832_1#353	SAMEA9404189	N/A	N/A	N/A	PRJEB30334	da Silva et al., 2022
318	ERR6294614	Nepal	South Asia	3.2.2	#b2df8a	2017-07-26	28832_1#120	SAMEA9404230	N/A	N/A	N/A	PRJEB30334	da Silva et al., 2022
319	ERR6294400	Nepal	South Asia	3.2.2	#b2df8a	2017-07-10	28632_6#68	SAMEA9404215	N/A	N/A	N/A	PRJEB30334	da Silva et al., 2022
320	ERR5200907	India	South Asia	3.2.2	#b2df8a	2019-04-25	Z10163	SAMEA7884086	N/A	N/A	N/A	PRJEB30334	da Silva et al., 2022
321	ERR4326176	Bangladesh	South Asia	3.2.2	#b2df8a	2017-11-12	29999_5#351	SAMEA5596459	N/A	N/A	N/A	PRJEB30334	da Silva et al., 2022
322	ERR4325856	Bangladesh	South Asia	3.2.2	#b2df8a	2018-05-06	29999_5#27	SAMEA5596275	N/A	N/A	N/A	PRJEB30334	da Silva et al., 2022
323	ERR4326003	Bangladesh	South Asia	3.2.2	#b2df8a	2018-06-06	29999_5#175	SAMEA5596208	N/A	N/A	N/A	PRJEB30334	da Silva et al., 2022
324	ERR4304110	Bangladesh	South Asia	3.2.2	#b2df8a	2018-06-09	29955_4#381	SAMEA5595715	N/A	N/A	N/A	PRJEB30334	da Silva et al., 2022
325	ERR4326060	Bangladesh	South Asia	3.2.2	#b2df8a	2018-03-21	29999_5#233	SAMEA5596327	N/A	N/A	N/A	PRJEB30334	da Silva et al., 2022
326	ERR4326095	Bangladesh	South Asia	3.2.2	#b2df8a	2018-04-05	29999_5#268	SAMEA5596336	N/A	N/A	N/A	PRJEB30334	da Silva et al., 2022
327	ERR4362477	Bangladesh	South Asia	3.2.2	#b2df8a	2017-11-11	30134_1#146	SAMEA5595854	N/A	N/A	N/A	PRJEB30334	da Silva et al., 2022
328	ERR4362502	Bangladesh	South Asia	3.2.2	#b2df8a	2017-11-06	30134_1#171	SAMEA5595860	N/A	N/A	N/A	PRJEB30334	da Silva et al., 2022
329	ERR4362351	Bangladesh	South Asia	3.2.2	#b2df8a	2017-11-16	30134_1#20	SAMEA5595822	N/A	N/A	N/A	PRJEB30334	da Silva et al., 2022
330	ERR4303948	Bangladesh	South Asia	3.2.2	#b2df8a	2017-07-08	29955_4#219	SAMEA5595568	N/A	N/A	N/A	PRJEB30334	da Silva et al., 2022
331	SRR1970274	India	South Asia	3	#b2df8a	2015	SRR1970274	SAMN03480350	GCA_008581335.1	PDT000059886.2	AAKURQ01	PRJNA248792	Ingle et al., 2019
332	ERR360521	Sri Lanka	South Asia	3	#b2df8a	2001	10592_2_73	SAMEA1930190	GCA_001104345.1	10592_2#73	CJJZ01	PRJEB3215	Wong et al., 2015
333	ERR352511	Unknown	Unknown	3	#ffffff	2012	10493_1_86	SAMEA2150023	GCA_001048255.1	10493_1#86	CVQB01	PRJEB3215	Wong et al., 2015
334	ERR352465	India	South Asia	3	#b2df8a	2011	10493_1_40	SAMEA2150728	GCA_001153665.1	10493_1#40	CJBX01	PRJEB3215	Wong et al., 2015
335	ERR352441	Indonesia	Southeast Asia	3	#fdbf6f	2012	10493_1_16	SAMEA2146350	GCA_001363515.1	10493_1#16	CGLR01	PRJEB3215	Wong et al., 2015
336	ERR357823	India	South Asia	3	#b2df8a	2011	10562_2_68	SAMEA2145414	GCA_001105625.1	10562_2#68	CJHY01	PRJEB3215	Wong et al., 2015
337	ERR326627	Indonesia	Southeast Asia	3	#fdbf6f	2011	9953_5_31	SAMEA2059216	GCA_001115785.1	9953_5#31	CJXF01	PRJEB3215	Wong et al., 2015
338	ERR326647	Indonesia	Southeast Asia	3	#fdbf6f	2006	9953_5_51	SAMEA2056368	GCA_001151325.1	9953_5#51	CJXY01	PRJEB3215	Wong et al., 2015
339	ERR326626	Indonesia	Southeast Asia	3	#fdbf6f	2010	9953_5_30	SAMEA2056362	GCA_001099125.1	9953_5#30	CJXG01	PRJEB3215	Wong et al., 2015
340	ERR352331	Indonesia	Southeast Asia	3	#fdbf6f	2011	10492_1_78	SAMEA1963906	GCA_001109285.1	10492_1#78	CJAY01	PRJEB3215	Wong et al., 2015
341	ERR331219	Indonesia	Southeast Asia	3	#fdbf6f	2007	10060_5_16	SAMEA2056803	GCA_001359975.1	10060_5#16	CEWZ01	PRJEB3215	Wong et al., 2015
342	ERR338064	Indonesia	Southeast Asia	3	#fdbf6f	2004	10071_3_88	SAMEA2059204	GCA_001081045.1	10071_3#88	CIRP01	PRJEB3215	Wong et al., 2015
343	ERR331215	Indonesia	Southeast Asia	3	#fdbf6f	2006	10060_5_12	SAMEA2058621	GCA_001360715.1	10060_5#12	CEXB01	PRJEB3215	Wong et al., 2015
344	ERR326613	Indonesia	Southeast Asia	3	#fdbf6f	2011	9953_5_17	SAMEA2057244	GCA_001124685.1	9953_5#17	CJWV01	PRJEB3215	Wong et al., 2015
345	ERR331237	Indonesia	Southeast Asia	3	#fdbf6f	2011	10060_5_34	SAMEA2056808	GCA_001360015.1	10060_5#34	CGIM01	PRJEB3215	Wong et al., 2015
346	ERR331249	Indonesia	Southeast Asia	3	#fdbf6f	2010	10060_5_46	SAMEA2056812	GCA_001082965.1	10060_5#46	CINO01	PRJEB3215	Wong et al., 2015
347	ERR331229	Indonesia	Southeast Asia	3	#fdbf6f	2009	10060_5_26	SAMEA1972208	GCA_001358735.1	10060_5#26	CGJK01	PRJEB3215	Wong et al., 2015
348	ERR331241	Indonesia	Southeast Asia	3	#fdbf6f	2009	10060_5_38	SAMEA2055897	GCA_001082085.1	10060_5#38	CIMX01	PRJEB3215	Wong et al., 2015
349	ERR326604	Indonesia	Southeast Asia	3	#fdbf6f	2006	9953_5_8	SAMEA2057241	GCA_001084005.1	9953_5#8	CJYW01	PRJEB3215	Wong et al., 2015
350	ERR352282	Indonesia	Southeast Asia	3	#fdbf6f	2010	10492_1_29	SAMEA2162537	GCA_001368215.1	10492_1#29	CGLU01	PRJEB3215	Wong et al., 2015
351	ERR352435	Philippines	Southeast Asia	3	#fdbf6f	2011	10493_1_10	SAMEA2159771	GCA_001367395.1	10493_1#10	CVLJ01	PRJEB3215	Wong et al., 2015
352	S4	Hong Kong	Hong Kong	3	#0000ff	2022	S4	SAMN32935255	N/A	N/A	N/A	PRJNA910287	This study
353	SRR5500506	Philippines	Southeast Asia	3	#fdbf6f	2015	SRR5500506	SAMN06885629	GCA_009215265.1	PDT000206977.2	AAMFUA01	PRJNA248792	Ingle et al., 2019
354	S6	Hong Kong	Hong Kong	3	#0000ff	2022	S6	SAMN32935257	N/A	N/A	N/A	PRJNA910287	This study
355	ERR357663	Vietnam	Southeast Asia	3	#fdbf6f	1994	10561_2_88	SAMEA2142543	GCA_001362435.1	10561_2#88	CVGN01	PRJEB3215	Wong et al., 2015
356	ERR343328	Philippines	Southeast Asia	3	#fdbf6f	2012	10349_1_80	SAMEA2072793	GCA_001362195.2	H12ESR00755-001A	CVLI01	PRJEB3215	Wong et al., 2015
357	ERR357761	Philippines	Southeast Asia	3	#fdbf6f	2011	10562_2_6	SAMEA2142779	GCA_001362555.1	10562_2#6	CVLN01	PRJEB3215	Wong et al., 2015
358	S5	Hong Kong	Hong Kong	3	#0000ff	2022	S5	SAMN32935256	N/A	N/A	N/A	PRJNA910287	This study
359	S2	Hong Kong	Hong Kong	3	#0000ff	2022	S2	SAMN32935254	N/A	N/A	N/A	PRJNA910287	This study
360	S1	Hong Kong	Hong Kong	3	#0000ff	2022	S1	SAMN32935253	N/A	N/A	N/A	PRJNA910287	This study
361	SRR1965489	No Travel Reported	Unknown	3	#ffffff	2014	SRR1965489	SAMN03475610	GCA_008053055.1	PDT000055176.2	AAJMSV01	PRJNA248792	Ingle et al., 2019
362	SRR5500425	No Travel Reported	Unknown	3	#ffffff	2015	SRR5500425	SAMN06885532	GCA_009214505.1	PDT000206896.2	AAMFRA01	PRJNA248792	Ingle et al., 2019
363	SRR5500442	No Travel Reported	Unknown	3	#ffffff	2015	SRR5500442	SAMN06885543	GCA_009214045.1	PDT000206913.2	AAMFRM01	PRJNA248792	Ingle et al., 2019
364	SRR5500488	No Travel Information	Unknown	3	#ffffff	2015	SRR5500488	SAMN06885592	GCA_009215225.1	PDT000206959.2	AAMFTI01	PRJNA248792	Ingle et al., 2019
365	SRR1967491	No Travel Reported	Unknown	3	#ffffff	2015	SRR1967491	SAMN03477581	GCA_008094805.1	PDT000057067.2	AAJPAP01	PRJNA248792	Ingle et al., 2019
366	SRR5631637	No Travel Information	Unknown	3.3	#ffffff	2017	SRR5631637	SAMN07179557	N/A	N/A	N/A	PRJNA248792	Ingle et al., 2019
367	ERR1837213	Nepal	South Asia	3.3	#b2df8a	2009	20621_8_1	SAMEA80530918	N/A	N/A	N/A	PRJEB14050	Britto et al., 2018
368	ERR1837137	Nepal	South Asia	3.3	#b2df8a	2008	20087_8_4	SAMEA80473918	N/A	N/A	N/A	PRJEB14050	Britto et al., 2018
369	SRR5500501	United States of America	North America	3.3	#d9d2e9	2015	SRR5500501	SAMN06885603	GCA_009216625.1	PDT000206972.2	AAMFTW01	PRJNA248792	Ingle et al., 2019
370	ERR2663868	Bangladesh	South Asia	3.3	#b2df8a	2005	343078_204137	SAMEA4759456	N/A	N/A	N/A	PRJEB27394	Tanmoy et al 2018
371	ERR1079293	Nepal	South Asia	3.3	#b2df8a	2013	ERR1079293	SAMEA3558929	GCA_023353155.1	PDT001306885.1	DAHDYM01	PRJNA514245	Pham Thanh et al., 2016
372	ERR1788739	India	South Asia	3.3	#b2df8a	1991	21052_3_3	SAMEA4384694	GCA_010249435.1	PDT000446818.1	DAAPQM01	PRJNA514245	Pragasam et al., 2020
373	SRR5500434	No Travel Reported	Unknown	3.3	#ffffff	2015	SRR5500434	SAMN06885546	GCA_009214705.1	PDT000206905.2	AAMFRF01	PRJNA248792	Ingle et al., 2019
374	SRR3048958	Pakistan	South Asia	3.3	#b2df8a	2015	SRR3048958	SAMN04363198	GCA_008735815.1	PDT000099124.2	AALDDY01	PRJNA248792	Ingle et al., 2019
375	ERR360465	Pakistan	South Asia	3.3	#b2df8a	2003	10592_2_17	SAMEA1929456	GCA_001356835.1	10592_2#17	CGMY01	PRJEB3215	Wong et al., 2015
376	ERR360490	Gabon	West Africa	3.3	#76D6FF	1998	10592_2_42	SAMEA1930171	GCA_001156265.1	10592_2#42	CJJI01	PRJEB3215	Wong et al., 2015
377	ERR357757	Sudan	North Africa	3.3	#7cd3e5	2008	10562_2_2	SAMEA2147262	GCA_001139385.1	10562_2#2	CJGL01	PRJEB3215	Wong et al., 2015
378	ERR352942	Sudan	North Africa	3.3	#7cd3e5	2008	MDUST11	SAMEA2163270	GCA_001170985.1	10541_2#2	CJDS01	PRJEB3215	Wong et al., 2015
379	SRR7165738	India	South Asia	3.3	#b2df8a	2016	SRR7165738	SAMN09210097	GCA_011665795.1	PDT000314767.2	AAQPON01	PRJNA248792	Ingle et al., 2019
380	ERR1079286	Nepal	South Asia	3.3	#b2df8a	2013	ERR1079286	SAMEA3558935	GCA_023353325.1	PDT001306878.1	DAHDYP01	PRJNA514245	Pham Thanh et al., 2016
381	ERR1079283	Nepal	South Asia	3.3	#b2df8a	2013	ERR1079283	SAMEA3558928	GCA_023357655.1	PDT001306875.1	DAHEAN01	PRJNA514245	Pham Thanh et al., 2016
382	SRR1967717	India	South Asia	3.3	#b2df8a	2014	SRR1967717	SAMN03477807	GCA_008097435.1	PDT000057293.2	AAJPFN01	PRJNA248792	Ingle et al., 2019
383	ERR1017095	India/Pakistan	South Asia	3.3	#b2df8a	2008	11800_1_86	SAMEA2228095	N/A	H08434 0321	N/A	PRJEB3215	Wong et al., 2016
384	ERR1017091	Pakistan	South Asia	3.3	#b2df8a	2008	11800_1_81	SAMEA2228090	N/A	H08384 0665	N/A	PRJEB3215	Wong et al., 2016
385	SRR5500513	India	South Asia	3.3	#b2df8a	2015	SRR5500513	SAMN06885609	GCA_009215625.1	PDT000206984.2	AAMFUI01	PRJNA248792	Ingle et al., 2019
386	ERR343330	India	South Asia	3.3	#b2df8a	2012	10349_1_82	SAMEA2072794	GCA_001163025.2	H12ESR04734-001A	CILC01	PRJEB3215	Wong et al., 2015
387	SRR1646380	United Kingdom	Europe	3.3	#b45f06	2012	H120660652	SAMN03169678	GCA_008021595.1	PDT000043697.4	AAJKUU01	PRJNA248792	-
388	SRR5949971	India	South Asia	3.3	#b2df8a	2016	SRR5949971	SAMN07528647	GCA_009474405.1	PDT000235636.2	AAMSTH01	PRJNA248792	Ingle et al., 2019
389	SRR5500427	India	South Asia	3.3	#b2df8a	2015	SRR5500427	SAMN06885535	GCA_009214725.1	PDT000206898.2	AAMFQZ01	PRJNA248792	Ingle et al., 2019
390	ERR3804541	India	South Asia	3.3	#b2df8a	2017	23733_3_43	SAMEA104208197	N/A	N/A	N/A	PRJEB14050	Britto et al., 2019
391	ERR352436	Unknown	Unknown	3.3	#ffffff	2011	10493_1_11	SAMEA2142508	GCA_001048075.1	10493_1#11	CVQA01	PRJEB3215	Wong et al., 2015
392	SRR7165439	India	South Asia	3.3	#b2df8a	2016	SRR7165439	SAMN09209836	GCA_011576625.1	PDT000314610.2	AAQJVH01	PRJNA248792	Ingle et al., 2019
393	SRR7166067	India	South Asia	3.3	#b2df8a	2016	SRR7166067	SAMN09210147	GCA_010963735.1	PDT000314817.2	AAOZZW01	PRJNA248792	Ingle et al., 2019
394	SRR7165593	India	South Asia	3.3	#b2df8a	2016	SRR7165593	SAMN09209958	GCA_010947295.1	PDT000314716.2	AAPBZA01	PRJNA248792	Ingle et al., 2019
395	SRR7165855	India	South Asia	3.3	#b2df8a	2016	SRR7165855	SAMN09210119	GCA_010977915.1	PDT000314807.2	AAPDBI01	PRJNA248792	Ingle et al., 2019
396	SRR5990010	India	South Asia	3.3	#b2df8a	2016	SRR5990010	SAMN07572663	GCA_009528755.1	PDT000237986.2	AAMXDO01	PRJNA248792	Ingle et al., 2019
397	ERR357779	India	South Asia	3.3	#b2df8a	2011	10562_2_24	SAMEA2162368	GCA_001165145.1	10562_2#24	CJGQ01	PRJEB3215	Wong et al., 2015
398	ERR357770	India	South Asia	3.3	#b2df8a	2011	10562_2_15	SAMEA2145782	GCA_001363355.1	10562_2#15	CVLM01	PRJEB3215	Wong et al., 2015
399	ERR357777	Bangladesh	South Asia	3.3	#b2df8a	2011	10562_2_22	SAMEA2152611	GCA_001117285.1	10562_2#22	CJGO01	PRJEB3215	Wong et al., 2015
400	ERR1837141	Nepal	South Asia	3.3	#b2df8a	2015	20087_8_8	SAMEA80476918	N/A	N/A	N/A	PRJEB14050	Britto et al., 2018
401	SRR5500428	India	South Asia	3.3	#b2df8a	2015	SRR5500428	SAMN06885529	GCA_009214405.1	PDT000206899.2	AAMFRE01	PRJNA248792	Ingle et al., 2019
402	SRR5982996	India	South Asia	3.3	#b2df8a	2016	SRR5982996	SAMN07566692	GCA_009478125.1	PDT000237315.2	AAMSZX01	PRJNA248792	Ingle et al., 2019
403	SRR5949977	India	South Asia	3.3	#b2df8a	2016	SRR5949977	SAMN07528644	GCA_009474425.1	PDT000235638.2	AAMSTG01	PRJNA248792	Ingle et al., 2019
404	SRR7165922	India	South Asia	3.3	#b2df8a	2016	SRR7165922	SAMN09210145	GCA_011591925.1	PDT000314812.2	AAQKPX01	PRJNA248792	Ingle et al., 2019
405	SRR5986542	India	South Asia	3.3	#b2df8a	2016	SRR5986542	SAMN07569793	GCA_009499265.1	PDT000237581.2	AAMTQA01	PRJNA248792	Ingle et al., 2019
406	SRR7165367	India	South Asia	3.3	#b2df8a	2016	SRR7165367	SAMN09209730	GCA_011532325.1	PDT000314540.2	AAQGOH01	PRJNA248792	Ingle et al., 2019
407	SRR5887794	India	South Asia	3.3	#b2df8a	2016	SRR5887794	SAMN07436136	GCA_009431395.1	PDT000230487.2	AAMRAN01	PRJNA248792	Ingle et al., 2019
408	ERR4046952	Pakistan	South Asia	3.3.1	#b2df8a	2018-06-25	29136_1#23	SAMEA5188868	N/A	N/A	N/A	PRJEB30334	da Silva et al., 2022
409	ERR4025188	Pakistan	South Asia	3.3.1	#b2df8a	2017-05-08	28933_2#20	SAMEA5188348	N/A	N/A	N/A	PRJEB30334	da Silva et al., 2022
410	ERR4025521	Pakistan	South Asia	3.3.1	#b2df8a	2017-10-27	28933_2#353	SAMEA5188546	N/A	N/A	N/A	PRJEB30334	da Silva et al., 2022
411	ERR4025443	Pakistan	South Asia	3.3.1	#b2df8a	2017-10-06	28933_2#275	SAMEA5188518	N/A	N/A	N/A	PRJEB30334	da Silva et al., 2022
412	ERR4025669	Pakistan	South Asia	3.3.1	#b2df8a	2018-04-09	29050_1#156	SAMEA5189193	N/A	N/A	N/A	PRJEB30334	da Silva et al., 2022
413	ERR5201151	India	South Asia	3.3.1	#b2df8a	2018-10-31	B10136	SAMEA7879958	N/A	N/A	N/A	PRJEB42715	da Silva et al., 2022
414	ERR5200989	India	South Asia	3.3.1	#b2df8a	2018-11-01	B10139	SAMEA7879983	N/A	N/A	N/A	PRJEB42715	da Silva et al., 2022
415	ERR5201113	India	South Asia	3.3.1	#b2df8a	2019-04-26	B10210	SAMEA7880234	N/A	N/A	N/A	PRJEB42715	da Silva et al., 2022
416	ERR5201361	India	South Asia	3.3.1	#b2df8a	2018-10-29	D11109	SAMEA7880348	N/A	N/A	N/A	PRJEB42715	da Silva et al., 2022
417	ERR5201272	India	South Asia	3.3.1	#b2df8a	2018-03-05	F10009	SAMEA7880740	N/A	N/A	N/A	PRJEB42715	da Silva et al., 2022
418	ERR4790855	India	South Asia	3.3.1	#b2df8a	2018-08-14	A10031	SAMEA5779384	N/A	N/A	N/A	PRJEB42715	da Silva et al., 2022
419	ERR4790694	India	South Asia	3.3.1	#b2df8a	2018-05-14	A10013	SAMEA5779401	N/A	N/A	N/A	PRJEB42715	da Silva et al., 2022
420	ERR5201131	India	South Asia	3.3.1	#b2df8a	2019-04-03	W10558	SAMEA7883424	N/A	N/A	N/A	PRJEB42715	da Silva et al., 2022
421	ERR4790686	India	South Asia	3.3.1	#b2df8a	2018-02-15	B10003	SAMEA5779397	N/A	N/A	N/A	PRJEB42715	da Silva et al., 2022
422	ERR4790777	India	South Asia	3.3.1	#b2df8a	2018-05-21	10118	SAMEA5779342	N/A	N/A	N/A	PRJEB14050	da Silva et al., 2022
423	ERR4790851	India	South Asia	3.3.1	#b2df8a	2018-05-18	B10044	SAMEA5779382	N/A	N/A	N/A	PRJEB14050	da Silva et al., 2022
424	ERR5200988	India	South Asia	3.3.1	#b2df8a	2019-04-18	B10202	SAMEA7880227	N/A	N/A	N/A	PRJEB42715	da Silva et al., 2022
425	ERR5200952	India	South Asia	3.3.1	#b2df8a	2019-03-20	B10182	SAMEA7880100	N/A	N/A	N/A	PRJEB42715	da Silva et al., 2022
426	ERR4790675	India	South Asia	3.3.1	#b2df8a	2018-03-31	B10014	SAMEA5779380	N/A	N/A	N/A	PRJEB42715	da Silva et al., 2022
427	ERR5200932	India	South Asia	3.3.1	#b2df8a	2019-04-09	B10193	SAMEA7880171	N/A	N/A	N/A	PRJEB42715	da Silva et al., 2022
428	ERR5200898	India	South Asia	3.3.1	#b2df8a	2018-07-27	T10128	SAMEA7883163	N/A	N/A	N/A	PRJEB42715	da Silva et al., 2022
429	ERR4790834	India	South Asia	3.3.1	#b2df8a	2018-05-16	B10041	SAMEA5779373	N/A	N/A	N/A	PRJEB42715	da Silva et al., 2022
430	ERR4992736	India	South Asia	3.3.1	#b2df8a	2017-12-15	D24159	SAMEA5779539	N/A	N/A	N/A	PRJEB42715	da Silva et al., 2022
431	ERR4992680	India	South Asia	3.3.1	#b2df8a	2018-04-27	T10015	SAMEA5779510	N/A	N/A	N/A	PRJEB42715	da Silva et al., 2022
432	ERR5201300	India	South Asia	3.3.1	#b2df8a	2018-10-23	A10041	SAMEA7879692	N/A	N/A	N/A	PRJEB42715	da Silva et al., 2022
433	ERR5201276	India	South Asia	3.3.1	#b2df8a	2018-10-03	A10037	SAMEA7879683	N/A	N/A	N/A	PRJEB42715	da Silva et al., 2022
434	ERR5200870	India	South Asia	3.3.1	#b2df8a	2019-03-06	W10709	SAMEA7883442	N/A	N/A	N/A	PRJEB42715	da Silva et al., 2022
435	ERR4992772	India	South Asia	3.3.1	#b2df8a	2018-03-13	D25012	SAMEA5779557	N/A	N/A	N/A	PRJEB42715	da Silva et al., 2022
436	ERR6118175	India	South Asia	3.3.1	#b2df8a	2018-09-04	Z10108	SAMEA9253092	GCA_024941485.1	PDT001393566.1	DAIYBD01	PRJNA514245	da Silva et al., 2022
437	ERR4790702	India	South Asia	3.3.1	#b2df8a	2018-05-18	T10048	SAMEA5779405	N/A	N/A	N/A	PRJEB14050	da Silva et al., 2022
438	ERR5201315	India	South Asia	3.3.1	#b2df8a	2019-02-20	D24562	SAMEA7880481	N/A	N/A	N/A	PRJEB42715	da Silva et al., 2022
439	ERR5201341	India	South Asia	3.3.1	#b2df8a	2019-04-08	D22606	SAMEA7880426	N/A	N/A	N/A	PRJEB42715	da Silva et al., 2022
440	ERR5201043	India	South Asia	3.3.1	#b2df8a	2019-02-19	D21240	SAMEA7880382	N/A	N/A	N/A	PRJEB42715	da Silva et al., 2022
441	ERR6294689	Nepal	South Asia	3.3.1	#b2df8a	2016-06-21	28832_1#343	SAMEA9404300	N/A	N/A	N/A	PRJEB30334	da Silva et al., 2022
442	ERR6294671	Nepal	South Asia	3.3.1	#b2df8a	2017-10-08	28832_1#299	SAMEA9404283	N/A	N/A	N/A	PRJEB30334	da Silva et al., 2022
443	ERR6294555	Nepal	South Asia	3.3.1	#b2df8a	2016-10-17	28832_1#2	SAMEA9404195	N/A	N/A	N/A	PRJEB30334	da Silva et al., 2022
444	ERR5375950	Nepal	South Asia	3.3.1	#b2df8a	2018-10-09	33308_1#74	SAMEA6264940	N/A	N/A	N/A	PRJEB30334	da Silva et al., 2022
445	ERR6294578	Nepal	South Asia	3.3.1	#b2df8a	2017-04-12	28832_1#46	SAMEA9404209	N/A	N/A	N/A	PRJEB30334	da Silva et al., 2022
446	ERR6294493	Nepal	South Asia	3.3.1	#b2df8a	2017-12-04	28632_6#288	SAMEA9403940	N/A	N/A	N/A	PRJEB30334	da Silva et al., 2022
447	ERR6294408	Nepal	South Asia	3.3.1	#b2df8a	2017-11-02	28632_6#90	SAMEA9403991	N/A	N/A	N/A	PRJEB30334	da Silva et al., 2022
448	ERR6336454	Nepal	South Asia	3.3.1	#b2df8a	2015-11-30	28832_1#28	SAMEA9404316	N/A	N/A	N/A	PRJEB30334	da Silva et al., 2022
449	ERR6294696	Nepal	South Asia	3.3.1	#b2df8a	2017-06-06	28832_1#361	SAMEA9404190	N/A	N/A	N/A	PRJEB30334	da Silva et al., 2022
450	ERR1079270	Nepal	South Asia	3.3	#b2df8a	2013	ERR1079270	SAMEA3558921	GCA_023353875.1	PDT001306862.1	DAHDZA01	PRJNA514245	Pham Thanh et al., 2016
451	ERR6294635	Nepal	South Asia	3.3.1	#b2df8a	2017-04-11	28832_1#216	SAMEA9404152	N/A	N/A	N/A	PRJEB30334	da Silva et al., 2022
452	ERR5311351	Nepal	South Asia	3.3.1	#b2df8a	2018-07-31	33253_3#111	SAMEA6265035	N/A	N/A	N/A	PRJEB30334	da Silva et al., 2022
453	ERR5375962	Nepal	South Asia	3.3.1	#b2df8a	2019-02-21	33308_1#90	SAMEA6264945	N/A	N/A	N/A	PRJEB30334	da Silva et al., 2022
454	ERR5376010	Nepal	South Asia	3.3.1	#b2df8a	2019-10-06	33308_1#154	SAMEA6264974	N/A	N/A	N/A	PRJEB30334	da Silva et al., 2022
455	ERR5311368	Nepal	South Asia	3.3.1	#b2df8a	2018-09-17	33253_3#144	SAMEA6265040	N/A	N/A	N/A	PRJEB30334	da Silva et al., 2022
456	ERR5311527	Nepal	South Asia	3.3.1	#b2df8a	2019-12-06	33253_3#363	SAMEA6264990	N/A	N/A	N/A	PRJEB30334	da Silva et al., 2022
457	ERR6294460	Nepal	South Asia	3.3.1	#b2df8a	2017-04-02	28632_6#222	SAMEA9403924	N/A	N/A	N/A	PRJEB30334	da Silva et al., 2022
458	ERR6294475	Nepal	South Asia	3.3.1	#b2df8a	2017-03-16	28632_6#260	SAMEA9404062	N/A	N/A	N/A	PRJEB30334	da Silva et al., 2022
459	ERR5376136	Nepal	South Asia	3.3.1	#b2df8a	2018-03-22	33308_1#315	SAMEA6264718	N/A	N/A	N/A	PRJEB30334	da Silva et al., 2022
460	ERR6294429	Nepal	South Asia	3.3.1	#b2df8a	2017-06-01	28632_6#142	SAMEA9404014	N/A	N/A	N/A	PRJEB30334	da Silva et al., 2022
461	ERR6294471	Nepal	South Asia	3.3.1	#b2df8a	2017-10-10	28632_6#252	SAMEA9404059	N/A	N/A	N/A	PRJEB30334	da Silva et al., 2022
462	ERR6294561	Nepal	South Asia	3.3.1	#b2df8a	2017-08-22	28832_1#11	SAMEA9404200	N/A	N/A	N/A	PRJEB30334	da Silva et al., 2022
463	ERR6294372	Nepal	South Asia	3.3.1	#b2df8a	2017-08-22	28632_6#8	SAMEA9404106	N/A	N/A	N/A	PRJEB30334	da Silva et al., 2022
464	ERR6294636	Nepal	South Asia	3.3.1	#b2df8a	2017-10-02	28832_1#217	SAMEA9404258	N/A	N/A	N/A	PRJEB30334	da Silva et al., 2022
465	ERR6294677	Nepal	South Asia	3.3.1	#b2df8a	2017-08-21	28832_1#314	SAMEA9404178	N/A	N/A	N/A	PRJEB30334	da Silva et al., 2022
466	ERR6294658	Nepal	South Asia	3.3.1	#b2df8a	2017-08-08	28832_1#271	SAMEA9404166	N/A	N/A	N/A	PRJEB30334	da Silva et al., 2022
467	ERR6294399	Nepal	South Asia	3.3.1	#b2df8a	2017-08-03	28632_6#65	SAMEA9403985	N/A	N/A	N/A	PRJEB30334	da Silva et al., 2022
468	ERR6294571	Nepal	South Asia	3.3.1	#b2df8a	2017-10-02	28832_1#30	SAMEA9404206	N/A	N/A	N/A	PRJEB30334	da Silva et al., 2022
469	ERR4025160	Nepal	South Asia	3.3.1	#b2df8a	2017-07-21	28632_6#174	SAMEA5169415	N/A	N/A	N/A	PRJEB30334	da Silva et al., 2022
470	ERR5311524	Nepal	South Asia	3.3.1	#b2df8a	2019-09-06	33253_3#359	SAMEA6264984	N/A	N/A	N/A	PRJEB30334	da Silva et al., 2022
471	ERR5311473	Nepal	South Asia	3.3.1	#b2df8a	2018-03-07	33253_3#291	SAMEA6265084	N/A	N/A	N/A	PRJEB30334	da Silva et al., 2022
472	ERR5311512	Nepal	South Asia	3.3.1	#b2df8a	2019-06-19	33253_3#343	SAMEA6264979	N/A	N/A	N/A	PRJEB30334	da Silva et al., 2022
473	ERR6294495	Nepal	South Asia	3.3.1	#b2df8a	2017-10-15	28632_6#291	SAMEA9403992	N/A	N/A	N/A	PRJEB30334	da Silva et al., 2022
474	ERR5311537	Nepal	South Asia	3.3.1	#b2df8a	2019-06-21	33253_3#378	SAMEA6264991	N/A	N/A	N/A	PRJEB30334	da Silva et al., 2022
475	ERR6294607	Nepal	South Asia	3.3.1	#b2df8a	2018-01-22	28832_1#103	SAMEA9404229	N/A	N/A	N/A	PRJEB30334	da Silva et al., 2022
476	ERR6294476	Nepal	South Asia	3.3.1	#b2df8a	2018-02-02	28632_6#263	SAMEA9403934	N/A	N/A	N/A	PRJEB30334	da Silva et al., 2022
477	ERR5376022	Nepal	South Asia	3.3.1	#b2df8a	2019-09-07	33308_1#170	SAMEA6264988	N/A	N/A	N/A	PRJEB30334	da Silva et al., 2022
478	ERR5311521	Nepal	South Asia	3.3.1	#b2df8a	2019-02-06	33253_3#355	SAMEA6264986	N/A	N/A	N/A	PRJEB30334	da Silva et al., 2022
479	ERR5376038	Nepal	South Asia	3.3.1	#b2df8a	2018-05-27	33308_1#191	SAMEA6265014	N/A	N/A	N/A	PRJEB30334	da Silva et al., 2022
480	ERR5376107	Nepal	South Asia	3.3.1	#b2df8a	2018-12-14	33308_1#283	SAMEA6265098	N/A	N/A	N/A	PRJEB30334	da Silva et al., 2022
481	ERR5311534	Nepal	South Asia	3.3.1	#b2df8a	2019-07-07	33253_3#373	SAMEA6264987	N/A	N/A	N/A	PRJEB30334	da Silva et al., 2022
482	ERR5311486	Nepal	South Asia	3.3.1	#b2df8a	2019-05-30	33253_3#309	SAMEA6265106	N/A	N/A	N/A	PRJEB30334	da Silva et al., 2022
483	ERR5311465	Nepal	South Asia	3.3.1	#b2df8a	2018-11-04	33253_3#281	SAMEA6264704	N/A	N/A	N/A	PRJEB30334	da Silva et al., 2022
484	ERR5311377	Nepal	South Asia	3.3.1	#b2df8a	2018-07-12	33253_3#161	SAMEA6265048	N/A	N/A	N/A	PRJEB30334	da Silva et al., 2022
485	ERR5376014	Nepal	South Asia	3.3.1	#b2df8a	2019-06-18	33308_1#159	SAMEA6264975	N/A	N/A	N/A	PRJEB30334	da Silva et al., 2022
486	ERR5376140	Nepal	South Asia	3.3.1	#b2df8a	2019-03-05	33308_1#319	SAMEA6264864	N/A	N/A	N/A	PRJEB30334	da Silva et al., 2022
487	ERR5376122	Nepal	South Asia	3.3.1	#b2df8a	2019-04-25	33308_1#301	SAMEA6265104	N/A	N/A	N/A	PRJEB30334	da Silva et al., 2022
488	ERR5311327	Nepal	South Asia	3.3.1	#b2df8a	2018-12-04	33253_3#61	SAMEA6264843	N/A	N/A	N/A	PRJEB30334	da Silva et al., 2022
489	ERR5311484	Nepal	South Asia	3.3.1	#b2df8a	2018-04-15	33253_3#306	SAMEA6264733	N/A	N/A	N/A	PRJEB30334	da Silva et al., 2022
490	ERR5376077	Nepal	South Asia	3.3.1	#b2df8a	2018-04-15	33308_1#243	SAMEA6265088	N/A	N/A	N/A	PRJEB30334	da Silva et al., 2022
491	ERR5376123	Nepal	South Asia	3.3.1	#b2df8a	2018-08-05	33308_1#302	SAMEA6264867	N/A	N/A	N/A	PRJEB30334	da Silva et al., 2022
492	ERR5375988	Nepal	South Asia	3.3.1	#b2df8a	2018-04-04	33308_1#123	SAMEA6264775	N/A	N/A	N/A	PRJEB30334	da Silva et al., 2022
493	ERR5311483	Nepal	South Asia	3.3.1	#b2df8a	2018-05-06	33253_3#305	SAMEA6264965	N/A	N/A	N/A	PRJEB30334	da Silva et al., 2022
494	ERR4303865	Bangladesh	South Asia	3.3.2	#b2df8a	2018-06-02	29955_4#135	SAMEA5595749	N/A	N/A	N/A	PRJEB30334	da Silva et al., 2022
495	ERR6294491	Nepal	South Asia	3.3.2	#b2df8a	2017-06-27	28632_6#285	SAMEA9404028	N/A	N/A	N/A	PRJEB30334	da Silva et al., 2022
496	ERR6294669	Nepal	South Asia	3.3.2	#b2df8a	2017-07-27	28832_1#293	SAMEA9404173	N/A	N/A	N/A	PRJEB30334	da Silva et al., 2022
497	ERR6294610	Nepal	South Asia	3.3.2	#b2df8a	2017-05-10	28832_1#111	SAMEA9404125	N/A	N/A	N/A	PRJEB30334	da Silva et al., 2022
498	ERR6294620	Nepal	South Asia	3.3.2	#b2df8a	2017-06-26	28832_1#142	SAMEA9404131	N/A	N/A	N/A	PRJEB30334	da Silva et al., 2022
499	ERR6294633	Nepal	South Asia	3.3.2	#b2df8a	2017-08-30	28832_1#203	SAMEA9404149	N/A	N/A	N/A	PRJEB30334	da Silva et al., 2022
500	ERR6294641	Nepal	South Asia	3.3.2	#b2df8a	2017-08-01	28832_1#232	SAMEA9404156	N/A	N/A	N/A	PRJEB30334	da Silva et al., 2022
501	ERR6294622	Nepal	South Asia	3.3.2	#b2df8a	2017-06-26	28832_1#158	SAMEA9404137	N/A	N/A	N/A	PRJEB30334	da Silva et al., 2022
502	ERR6294634	Nepal	South Asia	3.3.2	#b2df8a	2017-07-03	28832_1#211	SAMEA9404151	N/A	N/A	N/A	PRJEB30334	da Silva et al., 2022
503	ERR6294655	Nepal	South Asia	3.3.2	#b2df8a	2017-06-26	28832_1#264	SAMEA9404164	N/A	N/A	N/A	PRJEB30334	da Silva et al., 2022
504	ERR6294611	Nepal	South Asia	3.3.2	#b2df8a	2017-08-02	28832_1#112	SAMEA9404227	N/A	N/A	N/A	PRJEB30334	da Silva et al., 2022
505	ERR6294466	Nepal	South Asia	3.3.2	#b2df8a	2017-07-17	28632_6#242	SAMEA9403928	N/A	N/A	N/A	PRJEB30334	da Silva et al., 2022
506	ERR5201075	India	South Asia	3.3.2	#b2df8a	2019-07-15	Z10208	SAMEA7884331	N/A	N/A	N/A	PRJEB42715	da Silva et al., 2022
507	ERR4634558	India	South Asia	3.3.2	#b2df8a	2018-07-27	M10423	SAMEA5779269	N/A	N/A	N/A	PRJEB42715	da Silva et al., 2022
508	ERR4992702	India	South Asia	3.3.2	#b2df8a	2018-05-08	D22360	SAMEA5779522	N/A	N/A	N/A	PRJEB42715	da Silva et al., 2022
509	ERR4790848	India	South Asia	3.3.2	#b2df8a	2018-05-03	T10021	SAMEA5779481	N/A	N/A	N/A	PRJEB42715	da Silva et al., 2022
510	ERR4992754	India	South Asia	3.3.2	#b2df8a	2018-03-08	D13338	SAMEA5779548	N/A	N/A	N/A	PRJEB42715	da Silva et al., 2022
511	ERR4992677	India	South Asia	3.3.2	#b2df8a	2018-08-07	B10096	SAMEA5779509	N/A	N/A	N/A	PRJEB42715	da Silva et al., 2022
512	ERR4362629	Bangladesh	South Asia	3.3.2	#b2df8a	2017-07-06	30134_1#298	SAMEA5596106	N/A	N/A	N/A	PRJEB30334	da Silva et al., 2022
513	ERR4362615	Bangladesh	South Asia	3.3.2	#b2df8a	2017-09-09	30134_1#284	SAMEA5595889	N/A	N/A	N/A	PRJEB30334	da Silva et al., 2022
514	ERR4326106	Bangladesh	South Asia	3.3.2	#b2df8a	2017-11-23	29999_5#279	SAMEA5596435	N/A	N/A	N/A	PRJEB30334	da Silva et al., 2022
515	ERR4362335	Bangladesh	South Asia	3.3.2	#b2df8a	2017-12-28	30134_1#4	SAMEA5595818	N/A	N/A	N/A	PRJEB30334	da Silva et al., 2022
516	ERR4362613	Bangladesh	South Asia	3.3.2	#b2df8a	2017-06-17	30134_1#282	SAMEA5596102	N/A	N/A	N/A	PRJEB30334	da Silva et al., 2022
517	ERR4304099	Bangladesh	South Asia	3.3.2	#b2df8a	2018-01-08	29955_4#370	SAMEA5595813	N/A	N/A	N/A	PRJEB30334	da Silva et al., 2022
518	ERR4326092	Bangladesh	South Asia	3.3.2	#b2df8a	2018-04-05	29999_5#265	SAMEA5596335	N/A	N/A	N/A	PRJEB30334	da Silva et al., 2022
519	ERR4326117	Bangladesh	South Asia	3.3.2	#b2df8a	2018-03-08	29999_5#290	SAMEA5596343	N/A	N/A	N/A	PRJEB30334	da Silva et al., 2022
520	ERR4362549	Bangladesh	South Asia	3.3.2	#b2df8a	2017-11-18	30134_1#218	SAMEA5595986	N/A	N/A	N/A	PRJEB30334	da Silva et al., 2022
521	ERR4326030	Bangladesh	South Asia	3.3.2	#b2df8a	2017-12-06	29999_5#202	SAMEA5596415	N/A	N/A	N/A	PRJEB30334	da Silva et al., 2022
522	ERR4326152	Bangladesh	South Asia	3.3.2	#b2df8a	2017-11-11	29999_5#327	SAMEA5596451	N/A	N/A	N/A	PRJEB30334	da Silva et al., 2022
523	ERR4326161	Bangladesh	South Asia	3.3.2	#b2df8a	2017-08-09	29999_5#336	SAMEA5596454	N/A	N/A	N/A	PRJEB30334	da Silva et al., 2022
524	ERR4326158	Bangladesh	South Asia	3.3.2	#b2df8a	2017-11-07	29999_5#333	SAMEA5596453	N/A	N/A	N/A	PRJEB30334	da Silva et al., 2022
525	ERR4325990	Bangladesh	South Asia	3.3.2	#b2df8a	2017-12-20	29999_5#161	SAMEA5596405	N/A	N/A	N/A	PRJEB30334	da Silva et al., 2022
526	ERR4362454	Bangladesh	South Asia	3.3.2	#b2df8a	2017-06-06	30134_1#123	SAMEA5595948	N/A	N/A	N/A	PRJEB30334	da Silva et al., 2022
527	ERR4325908	Bangladesh	South Asia	3.3.2	#b2df8a	2018-04-12	29999_5#79	SAMEA5596288	N/A	N/A	N/A	PRJEB30334	da Silva et al., 2022
528	SRR5989294	No Travel Information	Unknown	3.3	#ffffff	2015	SRR5989294	SAMN07572171	GCA_004275035.1	PDT000237602.2	AAAGSN01	PRJNA248792	Ingle et al., 2019
529	ERR4326014	Bangladesh	South Asia	3.3.2	#b2df8a	2017-11-25	29999_5#186	SAMEA5596411	N/A	N/A	N/A	PRJEB30334	da Silva et al., 2022
530	ERR4325890	Bangladesh	South Asia	3.3.2	#b2df8a	2017-11-14	29999_5#61	SAMEA5596476	N/A	N/A	N/A	PRJEB30334	da Silva et al., 2022
531	ERR4362611	Bangladesh	South Asia	3.3.2	#b2df8a	2017-10-12	30134_1#280	SAMEA5595888	N/A	N/A	N/A	PRJEB30334	da Silva et al., 2022
532	ERR4362578	Bangladesh	South Asia	3.3.2	#b2df8a	2016-11-10	30134_1#247	SAMEA5596007	N/A	N/A	N/A	PRJEB30334	da Silva et al., 2022
533	ERR4304077	Bangladesh	South Asia	3.3.2	#b2df8a	2017-07-31	29955_4#348	SAMEA5595604	N/A	N/A	N/A	PRJEB30334	da Silva et al., 2022
534	ERR4325887	Bangladesh	South Asia	3.3.2	#b2df8a	2018-07-15	29999_5#58	SAMEA5596179	N/A	N/A	N/A	PRJEB30334	da Silva et al., 2022
535	ERR4303992	Bangladesh	South Asia	3.3.2	#b2df8a	2017-08-31	29955_4#263	SAMEA5595581	N/A	N/A	N/A	PRJEB30334	da Silva et al., 2022
536	ERR4325986	Bangladesh	South Asia	3.3.2	#b2df8a	2017-12-24	29999_5#157	SAMEA5596404	N/A	N/A	N/A	PRJEB30334	da Silva et al., 2022
537	ERR4326126	Bangladesh	South Asia	3.3.2	#b2df8a	2018-03-12	29999_5#299	SAMEA5596346	N/A	N/A	N/A	PRJEB30334	da Silva et al., 2022
538	ERR4325925	Bangladesh	South Asia	3.3.2	#b2df8a	2018-04-17	29999_5#96	SAMEA5596292	N/A	N/A	N/A	PRJEB30334	da Silva et al., 2022
539	ERR4325873	Bangladesh	South Asia	3.3.2	#b2df8a	2018-02-17	29999_5#44	SAMEA5596375	N/A	N/A	N/A	PRJEB30334	da Silva et al., 2022
540	ERR4325974	Bangladesh	South Asia	3.3.2	#b2df8a	2018-01-25	29999_5#145	SAMEA5596401	N/A	N/A	N/A	PRJEB30334	da Silva et al., 2022
541	ERR4325964	Bangladesh	South Asia	3.3.2	#b2df8a	2018-06-27	29999_5#135	SAMEA5596198	N/A	N/A	N/A	PRJEB30334	da Silva et al., 2022
542	ERR4325960	Bangladesh	South Asia	3.3.2	#b2df8a	2018-06-20	29999_5#131	SAMEA5596197	N/A	N/A	N/A	PRJEB30334	da Silva et al., 2022
543	ERR4325963	Bangladesh	South Asia	3.3.2	#b2df8a	2017-10-15	29999_5#134	SAMEA5596494	N/A	N/A	N/A	PRJEB30334	da Silva et al., 2022
544	ERR4362623	Bangladesh	South Asia	3.3.2	#b2df8a	2017-08-31	30134_1#292	SAMEA5595891	N/A	N/A	N/A	PRJEB30334	da Silva et al., 2022
545	ERR4362696	Bangladesh	South Asia	3.3.2	#b2df8a	2018-07-31	30134_1#365	SAMEA5596159	N/A	N/A	N/A	PRJEB30334	da Silva et al., 2022
546	ERR4326136	Bangladesh	South Asia	3.3.2	#b2df8a	2017-12-04	29999_5#309	SAMEA5596445	N/A	N/A	N/A	PRJEB30334	da Silva et al., 2022
547	ERR4362627	Bangladesh	South Asia	3.3.2	#b2df8a	2017-09-14	30134_1#296	SAMEA5595892	N/A	N/A	N/A	PRJEB30334	da Silva et al., 2022
548	ERR4326032	Bangladesh	South Asia	3.3.2	#b2df8a	2018-06-06	29999_5#204	SAMEA5596215	N/A	N/A	N/A	PRJEB30334	da Silva et al., 2022
549	ERR4304087	Bangladesh	South Asia	3.3.2	#b2df8a	2017-12-17	29955_4#358	SAMEA5595810	N/A	N/A	N/A	PRJEB30334	da Silva et al., 2022
550	ERR4325864	Bangladesh	South Asia	3.3.2	#b2df8a	2018-05-13	29999_5#35	SAMEA5596277	N/A	N/A	N/A	PRJEB30334	da Silva et al., 2022
551	ERR4362391	Bangladesh	South Asia	3.3.2	#b2df8a	2018-05-19	30134_1#60	SAMEA5596259	N/A	N/A	N/A	PRJEB30334	da Silva et al., 2022
552	ERR4325832	Bangladesh	South Asia	3.3.2	#b2df8a	2018-01-30	29999_5#3	SAMEA5596360	N/A	N/A	N/A	PRJEB30334	da Silva et al., 2022
553	ERR4325870	Bangladesh	South Asia	3.3.2	#b2df8a	2017-11-02	29999_5#41	SAMEA5596471	N/A	N/A	N/A	PRJEB30334	da Silva et al., 2022
554	ERR4362437	Bangladesh	South Asia	3.3.2	#b2df8a	2017-11-26	30134_1#106	SAMEA5595848	N/A	N/A	N/A	PRJEB30334	da Silva et al., 2022
555	ERR4325872	Bangladesh	South Asia	3.3.2	#b2df8a	2018-05-09	29999_5#43	SAMEA5596279	N/A	N/A	N/A	PRJEB30334	da Silva et al., 2022
556	ERR4304031	Bangladesh	South Asia	3.3.2	#b2df8a	2018-01-30	29955_4#302	SAMEA5595793	N/A	N/A	N/A	PRJEB30334	da Silva et al., 2022
557	ERR6118174	India	South Asia	3.3.2	#b2df8a	2018-09-01	Z10106	SAMEA9253091	N/A	N/A	N/A	PRJEB42715	da Silva et al., 2022
558	ERR4362380	Bangladesh	South Asia	3.3.2	#b2df8a	2017-12-07	30134_1#49	SAMEA5595830	N/A	N/A	N/A	PRJEB30334	da Silva et al., 2022
559	ERR4304029	Bangladesh	South Asia	3.3.2	#b2df8a	2017-08-27	29955_4#300	SAMEA5595598	N/A	N/A	N/A	PRJEB30334	da Silva et al., 2022
560	ERR4304043	Bangladesh	South Asia	3.3.2	#b2df8a	2018-02-17	29955_4#314	SAMEA5595797	N/A	N/A	N/A	PRJEB30334	da Silva et al., 2022
561	ERR4325906	Bangladesh	South Asia	3.3.2	#b2df8a	2017-09-27	29999_5#77	SAMEA5596480	N/A	N/A	N/A	PRJEB30334	da Silva et al., 2022
562	ERR4362343	Bangladesh	South Asia	3.3.2	#b2df8a	2018-01-07	30134_1#12	SAMEA5595820	N/A	N/A	N/A	PRJEB30334	da Silva et al., 2022
563	ERR4326133	Bangladesh	South Asia	3.3.2	#b2df8a	2017-11-11	29999_5#306	SAMEA5596444	N/A	N/A	N/A	PRJEB30334	da Silva et al., 2022
564	ERR4362490	Bangladesh	South Asia	3.3.2	#b2df8a	2017-11-05	30134_1#159	SAMEA5595857	N/A	N/A	N/A	PRJEB30334	da Silva et al., 2022
565	ERR4362354	Bangladesh	South Asia	3.3.2	#b2df8a	2018-03-13	30134_1#23	SAMEA5596136	N/A	N/A	N/A	PRJEB30334	da Silva et al., 2022
566	ERR4362591	Bangladesh	South Asia	3.3.2	#b2df8a	2017-10-05	30134_1#260	SAMEA5595883	N/A	N/A	N/A	PRJEB30334	da Silva et al., 2022
567	ERR4362415	Bangladesh	South Asia	3.3.2	#b2df8a	2017-10-29	30134_1#84	SAMEA5596046	N/A	N/A	N/A	PRJEB30334	da Silva et al., 2022
568	ERR4303877	Bangladesh	South Asia	3.3.2	#b2df8a	2018-05-29	29955_4#147	SAMEA5595753	N/A	N/A	N/A	PRJEB30334	da Silva et al., 2022
569	ERR4303832	Bangladesh	South Asia	3.3.2	#b2df8a	2017-04-10	29955_4#102	SAMEA5595644	N/A	N/A	N/A	PRJEB30334	da Silva et al., 2022
570	ERR4325879	Bangladesh	South Asia	3.3.2	#b2df8a	2018-07-18	29999_5#50	SAMEA5596177	N/A	N/A	N/A	PRJEB30334	da Silva et al., 2022
571	ERR4304042	Bangladesh	South Asia	3.3.2.Bd2	#b2df8a	2018-07-25	29955_4#313	SAMEA5595698	N/A	N/A	N/A	PRJEB30334	da Silva et al., 2022
572	ERR4362517	Bangladesh	South Asia	3.3.2.Bd2	#b2df8a	2018-02-26	30134_1#186	SAMEA5595806	N/A	N/A	N/A	PRJEB30334	da Silva et al., 2022
573	ERR4303879	Bangladesh	South Asia	3.3.2.Bd2	#b2df8a	2017-09-19	29955_4#149	SAMEA5595544	N/A	N/A	N/A	PRJEB30334	da Silva et al., 2022
574	ERR4362665	Bangladesh	South Asia	3.3.2.Bd2	#b2df8a	2016-11-24	30134_1#334	SAMEA5596011	N/A	N/A	N/A	PRJEB30334	da Silva et al., 2022
575	ERR4362652	Bangladesh	South Asia	3.3.2.Bd2	#b2df8a	2016-11-20	30134_1#321	SAMEA5596008	N/A	N/A	N/A	PRJEB30334	da Silva et al., 2022
576	ERR4362654	Bangladesh	South Asia	3.3.2.Bd2	#b2df8a	2018-07-08	30134_1#323	SAMEA5596148	N/A	N/A	N/A	PRJEB30334	da Silva et al., 2022
577	ERR4325855	Bangladesh	South Asia	3.3.2.Bd2	#b2df8a	2018-07-22	29999_5#26	SAMEA5596171	N/A	N/A	N/A	PRJEB30334	da Silva et al., 2022
578	ERR4362524	Bangladesh	South Asia	3.3.2.Bd2	#b2df8a	2017-02-16	30134_1#193	SAMEA5596077	N/A	N/A	N/A	PRJEB30334	da Silva et al., 2022
579	ERR4362706	Bangladesh	South Asia	3.3.2.Bd2	#b2df8a	2016-10-15	30134_1#375	SAMEA5596022	N/A	N/A	N/A	PRJEB30334	da Silva et al., 2022
580	ERR4326076	Bangladesh	South Asia	3.3.2.Bd2	#b2df8a	2018-03-22	29999_5#249	SAMEA5596331	N/A	N/A	N/A	PRJEB30334	da Silva et al., 2022
581	ERR6294547	Nepal	South Asia	3.3.2	#b2df8a	2018-01-14	28632_6#374	SAMEA9404080	N/A	N/A	N/A	PRJEB30334	da Silva et al., 2022
582	ERR6294468	Nepal	South Asia	3.3.2	#b2df8a	2017-11-24	28632_6#246	SAMEA9403930	N/A	N/A	N/A	PRJEB30334	da Silva et al., 2022
583	ERR5375913	Nepal	South Asia	3.3.2	#b2df8a	2018-04-03	33308_1#30	SAMEA6264746	N/A	N/A	N/A	PRJEB30334	da Silva et al., 2022
584	ERR5375922	Nepal	South Asia	3.3.2	#b2df8a	2018-08-03	33308_1#39	SAMEA6264750	N/A	N/A	N/A	PRJEB30334	da Silva et al., 2022
585	ERR6294532	Nepal	South Asia	3.3.2	#b2df8a	2018-02-23	28632_6#353	SAMEA9404073	N/A	N/A	N/A	PRJEB30334	da Silva et al., 2022
586	ERR6294519	Nepal	South Asia	3.3.2	#b2df8a	2018-02-22	28632_6#333	SAMEA9404069	N/A	N/A	N/A	PRJEB30334	da Silva et al., 2022
587	ERR6294500	Nepal	South Asia	3.3.2	#b2df8a	2018-02-16	28632_6#300	SAMEA9403944	N/A	N/A	N/A	PRJEB30334	da Silva et al., 2022
588	ERR6294453	Nepal	South Asia	3.3.2	#b2df8a	2018-01-29	28632_6#207	SAMEA9404049	N/A	N/A	N/A	PRJEB30334	da Silva et al., 2022
589	ERR6294506	Nepal	South Asia	3.3.2	#b2df8a	2017-11-29	28632_6#315	SAMEA9404008	N/A	N/A	N/A	PRJEB30334	da Silva et al., 2022
590	ERR6294553	Nepal	South Asia	3.3.2	#b2df8a	2018-01-09	28632_6#384	SAMEA9404098	N/A	N/A	N/A	PRJEB30334	da Silva et al., 2022
591	ERR5375925	Nepal	South Asia	3.3.2	#b2df8a	2018-08-03	33308_1#42	SAMEA6264748	N/A	N/A	N/A	PRJEB30334	da Silva et al., 2022
592	ERR6294431	Nepal	South Asia	3.3.2	#b2df8a	2017-12-15	28632_6#146	SAMEA9404015	N/A	N/A	N/A	PRJEB30334	da Silva et al., 2022
593	ERR6294574	Nepal	South Asia	3.3.2	#b2df8a	2018-02-02	28832_1#37	SAMEA9404096	N/A	N/A	N/A	PRJEB30334	da Silva et al., 2022
594	ERR5376108	Nepal	South Asia	3.3.2	#b2df8a	2018-05-03	33308_1#284	SAMEA6264705	N/A	N/A	N/A	PRJEB30334	da Silva et al., 2022
595	ERR6294688	Nepal	South Asia	3.3.2	#b2df8a	2017-12-29	28832_1#342	SAMEA9404185	N/A	N/A	N/A	PRJEB30334	da Silva et al., 2022
596	ERR6294478	Nepal	South Asia	3.3.2	#b2df8a	2018-01-26	28632_6#267	SAMEA9403935	N/A	N/A	N/A	PRJEB30334	da Silva et al., 2022
597	ERR6294438	Nepal	South Asia	3.3.2	#b2df8a	2018-02-21	28632_6#167	SAMEA9404021	N/A	N/A	N/A	PRJEB30334	da Silva et al., 2022
598	ERR6294388	Nepal	South Asia	3.3.2	#b2df8a	2017-11-18	28632_6#44	SAMEA9404141	N/A	N/A	N/A	PRJEB30334	da Silva et al., 2022
599	ERR6294504	Nepal	South Asia	3.3.2	#b2df8a	2017-11-22	28632_6#311	SAMEA9404004	N/A	N/A	N/A	PRJEB30334	da Silva et al., 2022
600	ERR6294455	Nepal	South Asia	3.3.2	#b2df8a	2018-01-23	28632_6#211	SAMEA9404050	N/A	N/A	N/A	PRJEB30334	da Silva et al., 2022
601	ERR6294414	Nepal	South Asia	3.3.2	#b2df8a	2017-12-10	28632_6#106	SAMEA9403995	N/A	N/A	N/A	PRJEB30334	da Silva et al., 2022
602	ERR5376109	Nepal	South Asia	3.3.2	#b2df8a	2018-06-03	33308_1#285	SAMEA6264710	N/A	N/A	N/A	PRJEB30334	da Silva et al., 2022
603	ERR5376183	Nepal	South Asia	3.3.2	#b2df8a	2018-04-20	33308_1#362	SAMEA6264737	N/A	N/A	N/A	PRJEB30334	da Silva et al., 2022
604	ERR6294632	Nepal	South Asia	3.3.2	#b2df8a	2018-01-16	28832_1#201	SAMEA9404252	N/A	N/A	N/A	PRJEB30334	da Silva et al., 2022
605	ERR5375934	Nepal	South Asia	3.3.2	#b2df8a	2018-11-03	33308_1#51	SAMEA6264771	N/A	N/A	N/A	PRJEB30334	da Silva et al., 2022
606	ERR6294404	Nepal	South Asia	3.3.2	#b2df8a	2017-03-02	28632_6#77	SAMEA9404257	N/A	N/A	N/A	PRJEB30334	da Silva et al., 2022
607	ERR5311491	Nepal	South Asia	3.3.2	#b2df8a	2018-12-03	33253_3#316	SAMEA6264755	N/A	N/A	N/A	PRJEB30334	da Silva et al., 2022
608	ERR4362464	Bangladesh	South Asia	3.3.2.Bd1	#b2df8a	2017-08-16	30134_1#133	SAMEA5595579	N/A	N/A	N/A	PRJEB30334	da Silva et al., 2022
609	ERR4304085	Bangladesh	South Asia	3.3.2.Bd1	#b2df8a	2017-06-06	29955_4#356	SAMEA5595607	N/A	N/A	N/A	PRJEB30334	da Silva et al., 2022
610	ERR4326071	Bangladesh	South Asia	3.3.2.Bd1	#b2df8a	2018-06-28	29999_5#244	SAMEA5596225	N/A	N/A	N/A	PRJEB30334	da Silva et al., 2022
611	ERR4899185	Bangladesh	South Asia	3.3.2.Bd1	#b2df8a	2018-07-11	29999_5#167	SAMEA5596206	N/A	N/A	N/A	PRJEB30334	da Silva et al., 2022
612	ERR4362438	Bangladesh	South Asia	3.3.2.Bd1	#b2df8a	2017-05-25	30134_1#107	SAMEA5595944	N/A	N/A	N/A	PRJEB30334	da Silva et al., 2022
613	SRR1957807	India	South Asia	3.3	#b2df8a	2014	SRR1957807	SAMN03465703	GCA_011085845.1	PDT000052790.2	AAPFVQ01	PRJNA248792	Ingle et al., 2019
614	ERR2663589	Bangladesh	South Asia	3.3	#b2df8a	2001	311189_294186	SAMEA4759177	N/A	N/A	N/A	PRJEB27394	Tanmoy et al 2018
615	ERR4362614	Bangladesh	South Asia	3.3.2.Bd1	#b2df8a	2017-01-26	30134_1#283	SAMEA5596110	N/A	N/A	N/A	PRJEB30334	da Silva et al., 2022
616	ERR4325850	Bangladesh	South Asia	3.3.2.Bd1	#b2df8a	2017-11-07	29999_5#21	SAMEA5596466	N/A	N/A	N/A	PRJEB30334	da Silva et al., 2022
617	ERR4362440	Bangladesh	South Asia	3.3.2.Bd1	#b2df8a	2017-08-02	30134_1#109	SAMEA5595550	N/A	N/A	N/A	PRJEB30334	da Silva et al., 2022
618	ERR4303848	Bangladesh	South Asia	3.3.2.Bd1	#b2df8a	2017-07-18	29955_4#118	SAMEA5595648	N/A	N/A	N/A	PRJEB30334	da Silva et al., 2022
619	ERR4362704	Bangladesh	South Asia	3.3.2.Bd1	#b2df8a	2018-07-29	30134_1#373	SAMEA5596161	N/A	N/A	N/A	PRJEB30334	da Silva et al., 2022
620	ERR4304102	Bangladesh	South Asia	3.3.2.Bd1	#b2df8a	2018-07-18	29955_4#373	SAMEA5595713	N/A	N/A	N/A	PRJEB30334	da Silva et al., 2022
621	ERR4362364	Bangladesh	South Asia	3.3.2.Bd1	#b2df8a	2017-06-19	30134_1#33	SAMEA5595925	N/A	N/A	N/A	PRJEB30334	da Silva et al., 2022
622	ERR4362544	Bangladesh	South Asia	3.3.2.Bd1	#b2df8a	2017-03-19	30134_1#213	SAMEA5596082	N/A	N/A	N/A	PRJEB30334	da Silva et al., 2022
623	ERR4304086	Bangladesh	South Asia	3.3.2.Bd1	#b2df8a	2018-07-15	29955_4#357	SAMEA5595709	N/A	N/A	N/A	PRJEB30334	da Silva et al., 2022
624	ERR4362363	Bangladesh	South Asia	3.3.2.Bd1	#b2df8a	2017-11-23	30134_1#32	SAMEA5595825	N/A	N/A	N/A	PRJEB30334	da Silva et al., 2022
625	ERR4325939	Bangladesh	South Asia	3.3.2.Bd1	#b2df8a	2017-10-28	29999_5#110	SAMEA5596488	N/A	N/A	N/A	PRJEB30334	da Silva et al., 2022
626	ERR4362630	Bangladesh	South Asia	3.3.2.Bd1	#b2df8a	2018-01-22	30134_1#299	SAMEA5596140	N/A	N/A	N/A	PRJEB30334	da Silva et al., 2022
627	ERR4362642	Bangladesh	South Asia	3.3.2.Bd1	#b2df8a	2018-06-12	30134_1#311	SAMEA5596145	N/A	N/A	N/A	PRJEB30334	da Silva et al., 2022
628	ERR4325860	Bangladesh	South Asia	3.3.2.Bd1	#b2df8a	2018-05-08	29999_5#31	SAMEA5596276	N/A	N/A	N/A	PRJEB30334	da Silva et al., 2022
629	ERR4303965	Bangladesh	South Asia	3.3.2.Bd1	#b2df8a	2016-11-10	29955_4#236	SAMEA5595677	N/A	N/A	N/A	PRJEB30334	da Silva et al., 2022
630	ERR4362663	Bangladesh	South Asia	3.3.2.Bd1	#b2df8a	2017-08-10	30134_1#332	SAMEA5595901	N/A	N/A	N/A	PRJEB30334	da Silva et al., 2022
631	ERR4303907	Bangladesh	South Asia	3.3.2.Bd1	#b2df8a	2016-11-29	29955_4#178	SAMEA5595663	N/A	N/A	N/A	PRJEB30334	da Silva et al., 2022
632	ERR4303903	Bangladesh	South Asia	3.3.2.Bd1	#b2df8a	2016-11-27	29955_4#174	SAMEA5595662	N/A	N/A	N/A	PRJEB30334	da Silva et al., 2022
633	ERR4303920	Bangladesh	South Asia	3.3.2.Bd1	#b2df8a	2017-04-15	29955_4#191	SAMEA5595666	N/A	N/A	N/A	PRJEB30334	da Silva et al., 2022
634	ERR4362555	Bangladesh	South Asia	3.3.2.Bd1	#b2df8a	2017-01-29	30134_1#224	SAMEA5595974	N/A	N/A	N/A	PRJEB30334	da Silva et al., 2022
635	ERR4362608	Bangladesh	South Asia	3.3.2.Bd1	#b2df8a	2017-01-05	30134_1#277	SAMEA5595991	N/A	N/A	N/A	PRJEB30334	da Silva et al., 2022
636	ERR4326054	Bangladesh	South Asia	3.3.2.Bd1	#b2df8a	2017-10-09	29999_5#227	SAMEA5596518	N/A	N/A	N/A	PRJEB30334	da Silva et al., 2022
637	ERR4362557	Bangladesh	South Asia	3.3.2.Bd1	#b2df8a	2017-01-16	30134_1#226	SAMEA5595996	N/A	N/A	N/A	PRJEB30334	da Silva et al., 2022
638	ERR4362648	Bangladesh	South Asia	3.3.2.Bd1	#b2df8a	2016-11-09	30134_1#317	SAMEA5596006	N/A	N/A	N/A	PRJEB30334	da Silva et al., 2022
639	ERR4362523	Bangladesh	South Asia	3.3.2.Bd1	#b2df8a	2017-05-02	30134_1#192	SAMEA5595965	N/A	N/A	N/A	PRJEB30334	da Silva et al., 2022
640	ERR4303828	Bangladesh	South Asia	3.3.2.Bd1	#b2df8a	2017-05-04	29955_4#98	SAMEA5595643	N/A	N/A	N/A	PRJEB30334	da Silva et al., 2022
641	ERR4362511	Bangladesh	South Asia	3.3.2.Bd1	#b2df8a	2017-04-19	30134_1#180	SAMEA5595962	N/A	N/A	N/A	PRJEB30334	da Silva et al., 2022
642	ERR4325921	Bangladesh	South Asia	3.3.2.Bd1	#b2df8a	2018-01-03	29999_5#92	SAMEA5596387	N/A	N/A	N/A	PRJEB30334	da Silva et al., 2022
643	ERR4326022	Bangladesh	South Asia	3.3.2.Bd1	#b2df8a	2017-12-26	29999_5#194	SAMEA5596413	N/A	N/A	N/A	PRJEB30334	da Silva et al., 2022
644	ERR4326073	Bangladesh	South Asia	3.3.2.Bd1	#b2df8a	2018-01-10	29999_5#246	SAMEA5596426	N/A	N/A	N/A	PRJEB30334	da Silva et al., 2022
645	ERR4304107	Bangladesh	South Asia	3.3.2.Bd1	#b2df8a	2018-01-02	29955_4#378	SAMEA5595816	N/A	N/A	N/A	PRJEB30334	da Silva et al., 2022
646	ERR4303997	Bangladesh	South Asia	3.3.2.Bd1	#b2df8a	2016-12-03	29955_4#268	SAMEA5595685	N/A	N/A	N/A	PRJEB30334	da Silva et al., 2022
647	ERR4362635	Bangladesh	South Asia	3.3.2.Bd1	#b2df8a	2017-09-14	30134_1#304	SAMEA5595894	N/A	N/A	N/A	PRJEB30334	da Silva et al., 2022
648	ERR4304033	Bangladesh	South Asia	3.3.2.Bd1	#b2df8a	2017-08-05	29955_4#304	SAMEA5595599	N/A	N/A	N/A	PRJEB30334	da Silva et al., 2022
649	ERR4362550	Bangladesh	South Asia	3.3.2.Bd1	#b2df8a	2017-10-15	30134_1#219	SAMEA5595872	N/A	N/A	N/A	PRJEB30334	da Silva et al., 2022
650	ERR4362617	Bangladesh	South Asia	3.3.2.Bd1	#b2df8a	2017-06-18	30134_1#286	SAMEA5596103	N/A	N/A	N/A	PRJEB30334	da Silva et al., 2022
651	ERR4325902	Bangladesh	South Asia	3.3.2.Bd1	#b2df8a	2017-09-16	29999_5#73	SAMEA5596479	N/A	N/A	N/A	PRJEB30334	da Silva et al., 2022
652	ERR4362661	Bangladesh	South Asia	3.3.2.Bd1	#b2df8a	2017-03-08	30134_1#330	SAMEA5596115	N/A	N/A	N/A	PRJEB30334	da Silva et al., 2022
653	ERR4304074	Bangladesh	South Asia	3.3.2.Bd1	#b2df8a	2018-07-16	29955_4#345	SAMEA5595706	N/A	N/A	N/A	PRJEB30334	da Silva et al., 2022
654	ERR4362507	Bangladesh	South Asia	3.3.2.Bd1	#b2df8a	2017-04-18	30134_1#176	SAMEA5595961	N/A	N/A	N/A	PRJEB30334	da Silva et al., 2022
655	ERR4304061	Bangladesh	South Asia	3.3.2.Bd1	#b2df8a	2017-07-11	29955_4#332	SAMEA5595589	N/A	N/A	N/A	PRJEB30334	da Silva et al., 2022
656	ERR4325927	Bangladesh	South Asia	3.3.2.Bd1	#b2df8a	2017-10-22	29999_5#98	SAMEA5596485	N/A	N/A	N/A	PRJEB30334	da Silva et al., 2022
657	ERR4362460	Bangladesh	South Asia	3.3.2.Bd1	#b2df8a	2017-09-05	30134_1#129	SAMEA5595576	N/A	N/A	N/A	PRJEB30334	da Silva et al., 2022
658	ERR4325910	Bangladesh	South Asia	3.3.2.Bd1	#b2df8a	2017-10-08	29999_5#81	SAMEA5596481	N/A	N/A	N/A	PRJEB30334	da Silva et al., 2022
659	ERR4304000	Bangladesh	South Asia	3.3.2.Bd1	#b2df8a	2017-08-26	29955_4#271	SAMEA5595583	N/A	N/A	N/A	PRJEB30334	da Silva et al., 2022
660	ERR4303958	Bangladesh	South Asia	3.3.2.Bd1	#b2df8a	2018-04-07	29955_4#229	SAMEA5595775	N/A	N/A	N/A	PRJEB30334	da Silva et al., 2022
661	ERR5376125	Nepal	South Asia	3.3.2	#b2df8a	2019-05-30	33308_1#304	SAMEA6265105	N/A	N/A	N/A	PRJEB30334	da Silva et al., 2022
662	ERR6294563	Nepal	South Asia	3.3.2	#b2df8a	2016-04-18	28832_1#15	SAMEA9404314	N/A	N/A	N/A	PRJEB30334	da Silva et al., 2022
663	ERR5311467	Nepal	South Asia	3.3.2	#b2df8a	2018-03-05	33253_3#283	SAMEA6264960	N/A	N/A	N/A	PRJEB30334	da Silva et al., 2022
664	ERR6294507	Nepal	South Asia	3.3.2	#b2df8a	2018-02-21	28632_6#316	SAMEA9403947	N/A	N/A	N/A	PRJEB30334	da Silva et al., 2022
665	ERR4025157	Nepal	South Asia	3.3.2	#b2df8a	2016-03-29	28632_6#149	SAMEA5205626	N/A	N/A	N/A	PRJEB30334	da Silva et al., 2022
666	ERR6294656	Nepal	South Asia	3.3.2	#b2df8a	2017-07-17	28832_1#268	SAMEA9404165	N/A	N/A	N/A	PRJEB30334	da Silva et al., 2022
667	ERR5311373	Nepal	South Asia	3.3.2	#b2df8a	2018-11-26	33253_3#153	SAMEA6265046	N/A	N/A	N/A	PRJEB30334	da Silva et al., 2022
668	ERR6294537	Nepal	South Asia	3.3.2	#b2df8a	2018-05-02	28632_6#360	SAMEA9403959	N/A	N/A	N/A	PRJEB30334	da Silva et al., 2022
669	ERR6294370	Nepal	South Asia	3.3.2	#b2df8a	2018-01-17	28632_6#4	SAMEA9404104	N/A	N/A	N/A	PRJEB30334	da Silva et al., 2022
670	ERR6294374	Nepal	South Asia	3.3.2	#b2df8a	2017-12-15	28632_6#12	SAMEA9404107	N/A	N/A	N/A	PRJEB30334	da Silva et al., 2022
671	ERR6294567	Nepal	South Asia	3.3.2	#b2df8a	2018-01-04	28832_1#22	SAMEA9404204	N/A	N/A	N/A	PRJEB30334	da Silva et al., 2022
672	ERR5376124	Nepal	South Asia	3.3.2	#b2df8a	2018-03-16	33308_1#303	SAMEA6264715	N/A	N/A	N/A	PRJEB30334	da Silva et al., 2022
673	ERR5311397	Nepal	South Asia	3.3.2	#b2df8a	2019-04-16	33253_3#190	SAMEA6265055	N/A	N/A	N/A	PRJEB30334	da Silva et al., 2022
674	ERR6294638	Nepal	South Asia	3.3.2	#b2df8a	2017-04-04	28832_1#222	SAMEA9404259	N/A	N/A	N/A	PRJEB30334	da Silva et al., 2022
675	ERR5311381	Nepal	South Asia	3.3.2	#b2df8a	2019-01-24	33253_3#169	SAMEA6265049	N/A	N/A	N/A	PRJEB30334	da Silva et al., 2022
676	ERR6294456	Nepal	South Asia	3.3.2	#b2df8a	2017-01-31	28632_6#214	SAMEA9403920	N/A	N/A	N/A	PRJEB30334	da Silva et al., 2022
677	ERR6294627	Nepal	South Asia	3.3.2	#b2df8a	2017-03-13	28832_1#182	SAMEA9404146	N/A	N/A	N/A	PRJEB30334	da Silva et al., 2022
678	ERR5376152	Nepal	South Asia	3.3.2	#b2df8a	2018-04-13	33308_1#331	SAMEA6264880	N/A	N/A	N/A	PRJEB30334	da Silva et al., 2022
679	ERR5376157	Nepal	South Asia	3.3.2	#b2df8a	2018-12-04	33308_1#336	SAMEA6264729	N/A	N/A	N/A	PRJEB30334	da Silva et al., 2022
680	ERR5311400	Nepal	South Asia	3.3.2	#b2df8a	2019-04-21	33253_3#195	SAMEA6265053	N/A	N/A	N/A	PRJEB30334	da Silva et al., 2022
681	ERR5311417	Nepal	South Asia	3.3.2	#b2df8a	2019-06-24	33253_3#217	SAMEA6264910	N/A	N/A	N/A	PRJEB30334	da Silva et al., 2022
682	ERR5311414	Nepal	South Asia	3.3.2	#b2df8a	2019-04-15	33253_3#213	SAMEA6264903	N/A	N/A	N/A	PRJEB30334	da Silva et al., 2022
683	ERR5311359	Nepal	South Asia	3.3.2	#b2df8a	2019-02-06	33253_3#125	SAMEA6264875	N/A	N/A	N/A	PRJEB30334	da Silva et al., 2022
684	ERR5376182	Nepal	South Asia	3.3.2	#b2df8a	2019-06-26	33308_1#361	SAMEA6264909	N/A	N/A	N/A	PRJEB30334	da Silva et al., 2022
685	ERR5311389	Nepal	South Asia	3.3.2	#b2df8a	2019-04-04	33253_3#179	SAMEA6264891	N/A	N/A	N/A	PRJEB30334	da Silva et al., 2022
686	ERR5376176	Nepal	South Asia	3.3.2	#b2df8a	2019-06-19	33308_1#355	SAMEA6264907	N/A	N/A	N/A	PRJEB30334	da Silva et al., 2022
687	ERR5311367	Nepal	South Asia	3.3.2	#b2df8a	2019-09-06	33253_3#141	SAMEA6264879	N/A	N/A	N/A	PRJEB30334	da Silva et al., 2022
688	ERR5376154	Nepal	South Asia	3.3.2	#b2df8a	2019-09-06	33308_1#333	SAMEA6264881	N/A	N/A	N/A	PRJEB30334	da Silva et al., 2022
689	ERR5311392	Nepal	South Asia	3.3.2	#b2df8a	2019-07-04	33253_3#183	SAMEA6264901	N/A	N/A	N/A	PRJEB30334	da Silva et al., 2022
690	ERR5311401	Nepal	South Asia	3.3.2	#b2df8a	2019-08-04	33253_3#196	SAMEA6264894	N/A	N/A	N/A	PRJEB30334	da Silva et al., 2022
691	ERR5311342	Nepal	South Asia	3.3.2	#b2df8a	2019-04-29	33253_3#91	SAMEA6264861	N/A	N/A	N/A	PRJEB30334	da Silva et al., 2022
692	ERR5311346	Nepal	South Asia	3.3.2	#b2df8a	2019-07-05	33253_3#100	SAMEA6264865	N/A	N/A	N/A	PRJEB30334	da Silva et al., 2022
693	ERR5376158	Nepal	South Asia	3.3.2	#b2df8a	2019-09-06	33308_1#337	SAMEA6264884	N/A	N/A	N/A	PRJEB30334	da Silva et al., 2022
694	ERR5311410	Nepal	South Asia	3.3.2	#b2df8a	2019-05-05	33253_3#207	SAMEA6265060	N/A	N/A	N/A	PRJEB30334	da Silva et al., 2022
695	ERR5311354	Nepal	South Asia	3.3.2	#b2df8a	2019-05-20	33253_3#116	SAMEA6264871	N/A	N/A	N/A	PRJEB30334	da Silva et al., 2022
696	ERR5311352	Nepal	South Asia	3.3.2	#b2df8a	2019-05-17	33253_3#112	SAMEA6264872	N/A	N/A	N/A	PRJEB30334	da Silva et al., 2022
697	ERR5376144	Nepal	South Asia	3.3.2	#b2df8a	2019-07-05	33308_1#323	SAMEA6264869	N/A	N/A	N/A	PRJEB30334	da Silva et al., 2022
698	ERR5311374	Nepal	South Asia	3.3.2	#b2df8a	2019-12-06	33253_3#154	SAMEA6264885	N/A	N/A	N/A	PRJEB30334	da Silva et al., 2022
699	ERR5311361	Nepal	South Asia	3.3.2	#b2df8a	2019-04-06	33253_3#129	SAMEA6264878	N/A	N/A	N/A	PRJEB30334	da Silva et al., 2022
700	ERR5376146	Nepal	South Asia	3.3.2	#b2df8a	2019-10-05	33308_1#325	SAMEA6264868	N/A	N/A	N/A	PRJEB30334	da Silva et al., 2022
701	ERR5311348	Nepal	South Asia	3.3.2	#b2df8a	2019-10-05	33253_3#104	SAMEA6264866	N/A	N/A	N/A	PRJEB30334	da Silva et al., 2022
702	ERR5311363	Nepal	South Asia	3.3.2	#b2df8a	2019-04-06	33253_3#133	SAMEA6264876	N/A	N/A	N/A	PRJEB30334	da Silva et al., 2022
703	ERR5311357	Nepal	South Asia	3.3.2	#b2df8a	2019-05-31	33253_3#121	SAMEA6264877	N/A	N/A	N/A	PRJEB30334	da Silva et al., 2022
704	ERR5311404	Nepal	South Asia	3.3.2	#b2df8a	2019-09-04	33253_3#199	SAMEA6264897	N/A	N/A	N/A	PRJEB30334	da Silva et al., 2022
705	ERR5376180	Nepal	South Asia	3.3.2	#b2df8a	2019-06-20	33308_1#359	SAMEA6264908	N/A	N/A	N/A	PRJEB30334	da Silva et al., 2022
706	ERR5311380	Nepal	South Asia	3.3.2	#b2df8a	2019-06-16	33253_3#166	SAMEA6264890	N/A	N/A	N/A	PRJEB30334	da Silva et al., 2022
707	ERR5311370	Nepal	South Asia	3.3.2	#b2df8a	2019-09-06	33253_3#146	SAMEA6264883	N/A	N/A	N/A	PRJEB30334	da Silva et al., 2022
708	ERR5376149	Nepal	South Asia	3.3.2	#b2df8a	2019-05-29	33308_1#328	SAMEA6264873	N/A	N/A	N/A	PRJEB30334	da Silva et al., 2022
709	ERR5311378	Nepal	South Asia	3.3.2	#b2df8a	2019-12-06	33253_3#162	SAMEA6264887	N/A	N/A	N/A	PRJEB30334	da Silva et al., 2022
710	ERR5311355	Nepal	South Asia	3.3.2	#b2df8a	2019-05-22	33253_3#117	SAMEA6264874	N/A	N/A	N/A	PRJEB30334	da Silva et al., 2022
711	ERR5311386	Nepal	South Asia	3.3.2	#b2df8a	2019-06-16	33253_3#175	SAMEA6264892	N/A	N/A	N/A	PRJEB30334	da Silva et al., 2022
712	ERR5311372	Nepal	South Asia	3.3.2	#b2df8a	2019-09-06	33253_3#150	SAMEA6264886	N/A	N/A	N/A	PRJEB30334	da Silva et al., 2022
713	ERR5376171	Nepal	South Asia	3.3.2	#b2df8a	2019-04-15	33308_1#350	SAMEA6264904	N/A	N/A	N/A	PRJEB30334	da Silva et al., 2022
714	ERR5311403	Nepal	South Asia	3.3.2	#b2df8a	2019-02-05	33253_3#198	SAMEA6265056	N/A	N/A	N/A	PRJEB30334	da Silva et al., 2022
715	ERR5311376	Nepal	South Asia	3.3.2	#b2df8a	2019-12-06	33253_3#158	SAMEA6264895	N/A	N/A	N/A	PRJEB30334	da Silva et al., 2022
716	ERR5311382	Nepal	South Asia	3.3.2	#b2df8a	2019-06-16	33253_3#170	SAMEA6264889	N/A	N/A	N/A	PRJEB30334	da Silva et al., 2022
717	ERR5311344	Nepal	South Asia	3.3.2	#b2df8a	2019-06-05	33253_3#96	SAMEA6264863	N/A	N/A	N/A	PRJEB30334	da Silva et al., 2022

## Sheet: Table S2 genotype 4.3.1.1.P1
Reads_id	Country/region	Region	Type	color code	Collecting date	Collecting date	strain name	Biosample	Assembly	Assembly Name	WGS project accession	BioProject	Source
ERR2093236	Pakistan	South Asia	4.3.1.1.P1	#ffffcc	2016	2016	22420_1#1	SAMEA103981505	N/A	N/A	N/A	PRJEB20363	Klemm et al., 2018
ERR2093237	Pakistan	South Asia	4.3.1.1.P1	#ffffcc	2016	2016	22420_1#2	SAMEA103981506	N/A	N/A	N/A	PRJEB20363	Klemm et al., 2018
ERR2093238	Pakistan	South Asia	4.3.1.1.P1	#ffffcc	2016	2016	22420_1#3	SAMEA103981507	N/A	N/A	N/A	PRJEB20363	Klemm et al., 2018
ERR2093239	Pakistan	South Asia	4.3.1.1.P1	#ffffcc	2016	2016	22420_1#4	SAMEA103981508	N/A	N/A	N/A	PRJEB20363	Klemm et al., 2018
ERR2093240	Pakistan	South Asia	4.3.1.1.P1	#ffffcc	2016	2016	22420_1#5	SAMEA103981509	N/A	N/A	N/A	PRJEB20363	Klemm et al., 2018
ERR2093241	Pakistan	South Asia	4.3.1.1.P1	#ffffcc	2016	2016	22420_1#6	SAMEA103981510	N/A	N/A	N/A	PRJEB20363	Klemm et al., 2018
ERR2093242	Pakistan	South Asia	4.3.1.1.P1	#ffffcc	2016	2016	22420_1#7	SAMEA103981511	N/A	N/A	N/A	PRJEB20363	Klemm et al., 2018
ERR2093243	Pakistan	South Asia	4.3.1.1.P1	#ffffcc	2016	2016	22420_1#8	SAMEA103981512	N/A	N/A	N/A	PRJEB20363	Klemm et al., 2018
ERR2093244	Pakistan	South Asia	4.3.1.1.P1	#ffffcc	2016	2016	22420_1#9	SAMEA103981513	N/A	N/A	N/A	PRJEB20363	Klemm et al., 2018
ERR2093245	Pakistan	South Asia	4.3.1.1.P1	#ffffcc	2016	2016	22420_1#10	SAMEA103981514	N/A	N/A	N/A	PRJEB20363	Klemm et al., 2018
ERR2093246	Pakistan	South Asia	4.3.1.1.P1	#ffffcc	2016	2016	22420_1#11	SAMEA103981515	N/A	N/A	N/A	PRJEB20363	Klemm et al., 2018
ERR2093247	Pakistan	South Asia	4.3.1.1.P1	#ffffcc	2016	2016	22420_1#12	SAMEA103981516	N/A	N/A	N/A	PRJEB20363	Klemm et al., 2018
ERR2093248	Pakistan	South Asia	4.3.1.1.P1	#ffffcc	2016	2016	22420_1#13	SAMEA103981517	N/A	N/A	N/A	PRJEB20363	Klemm et al., 2018
ERR2093249	Pakistan	South Asia	4.3.1.1.P1	#ffffcc	2016	2016	22420_1#14	SAMEA103981518	N/A	N/A	N/A	PRJEB20363	Klemm et al., 2018
ERR2093250	Pakistan	South Asia	4.3.1.1.P1	#c2e699	2017	2017	22420_1#15	SAMEA103981519	N/A	N/A	N/A	PRJEB20363	Klemm et al., 2018
ERR2093251	Pakistan	South Asia	4.3.1.1.P1	#c2e699	2017	2017	22420_1#16	SAMEA103981520	N/A	N/A	N/A	PRJEB20363	Klemm et al., 2018
ERR2093252	Pakistan	South Asia	4.3.1.1.P1	#c2e699	2017	2017	22420_1#17	SAMEA103981521	N/A	N/A	N/A	PRJEB20363	Klemm et al., 2018
ERR2093253	Pakistan	South Asia	4.3.1.1.P1	#c2e699	2017	2017	22420_1#18	SAMEA103981522	N/A	N/A	N/A	PRJEB20363	Klemm et al., 2018
ERR2093254	Pakistan	South Asia	4.3.1.1.P1	#c2e699	2017	2017	22420_1#19	SAMEA103981523	N/A	N/A	N/A	PRJEB20363	Klemm et al., 2018
ERR2093255	Pakistan	South Asia	4.3.1.1.P1	#c2e699	2017	2017	22420_1#20	SAMEA103981524	N/A	N/A	N/A	PRJEB20363	Klemm et al., 2018
ERR2093256	Pakistan	South Asia	4.3.1.1.P1	#c2e699	2017	2017	22420_1#21	SAMEA103981525	N/A	N/A	N/A	PRJEB20363	Klemm et al., 2018
ERR2093257	Pakistan	South Asia	4.3.1.1.P1	#c2e699	2017	2017	22420_1#22	SAMEA103981526	N/A	N/A	N/A	PRJEB20363	Klemm et al., 2018
ERR2093258	Pakistan	South Asia	4.3.1.1.P1	#c2e699	2017	2017	22420_1#23	SAMEA103981527	N/A	N/A	N/A	PRJEB20363	Klemm et al., 2018
ERR2093259	Pakistan	South Asia	4.3.1.1.P1	#c2e699	2017	2017	22420_1#24	SAMEA103981528	N/A	N/A	N/A	PRJEB20363	Klemm et al., 2018
ERR2093260	Pakistan	South Asia	4.3.1.1.P1	#c2e699	2017	2017	22420_1#25	SAMEA103981529	N/A	N/A	N/A	PRJEB20363	Klemm et al., 2018
ERR2093261	Pakistan	South Asia	4.3.1.1.P1	#c2e699	2017	2017	22420_1#26	SAMEA103981530	N/A	N/A	N/A	PRJEB20363	Klemm et al., 2018
ERR2093262	Pakistan	South Asia	4.3.1.1.P1	#c2e699	2017	2017	22420_1#27	SAMEA103981531	N/A	N/A	N/A	PRJEB20363	Klemm et al., 2018
ERR2093263	Pakistan	South Asia	4.3.1.1.P1	#c2e699	2017	2017	22420_1#28	SAMEA103981532	N/A	N/A	N/A	PRJEB20363	Klemm et al., 2018
ERR2093264	Pakistan	South Asia	4.3.1.1.P1	#c2e699	2017	2017	22420_1#29	SAMEA103981533	N/A	N/A	N/A	PRJEB20363	Klemm et al., 2018
ERR2093265	Pakistan	South Asia	4.3.1.1.P1	#c2e699	2017	2017	22420_1#30	SAMEA103981534	N/A	N/A	N/A	PRJEB20363	Klemm et al., 2018
ERR2093266	Pakistan	South Asia	4.3.1.1.P1	#c2e699	2017	2017	22420_1#31	SAMEA103981535	N/A	N/A	N/A	PRJEB20363	Klemm et al., 2018
ERR2093267	Pakistan	South Asia	4.3.1.1.P1	#c2e699	2017	2017	22420_1#32	SAMEA103981536	N/A	N/A	N/A	PRJEB20363	Klemm et al., 2018
ERR2093268	Pakistan	South Asia	4.3.1.1.P1	#c2e699	2017	2017	22420_1#33	SAMEA103981537	N/A	N/A	N/A	PRJEB20363	Klemm et al., 2018
ERR2093269	Pakistan	South Asia	4.3.1.1.P1	#c2e699	2017	2017	22420_1#34	SAMEA103981538	N/A	N/A	N/A	PRJEB20363	Klemm et al., 2018
ERR2093270	Pakistan	South Asia	4.3.1.1.P1	#c2e699	2017	2017	22420_1#35	SAMEA103981539	N/A	N/A	N/A	PRJEB20363	Klemm et al., 2018
ERR2093271	Pakistan	South Asia	4.3.1.1.P1	#c2e699	2017	2017	22420_1#36	SAMEA103981540	N/A	N/A	N/A	PRJEB20363	Klemm et al., 2018
ERR2093272	Pakistan	South Asia	4.3.1.1.P1	#c2e699	2017	2017	22420_1#37	SAMEA103981541	N/A	N/A	N/A	PRJEB20363	Klemm et al., 2018
ERR2093273	Pakistan	South Asia	4.3.1.1.P1	#c2e699	2017	2017	22420_1#38	SAMEA103981542	N/A	N/A	N/A	PRJEB20363	Klemm et al., 2018
ERR2093274	Pakistan	South Asia	4.3.1.1.P1	#c2e699	2017	2017	22420_1#39	SAMEA103981543	N/A	N/A	N/A	PRJEB20363	Klemm et al., 2018
ERR2093275	Pakistan	South Asia	4.3.1.1.P1	#c2e699	2017	2017	22420_1#40	SAMEA103981544	N/A	N/A	N/A	PRJEB20363	Klemm et al., 2018
ERR2093276	Pakistan	South Asia	4.3.1.1.P1	#c2e699	2017	2017	22420_1#41	SAMEA103981545	N/A	N/A	N/A	PRJEB20363	Klemm et al., 2018
ERR2093277	Pakistan	South Asia	4.3.1.1.P1	#c2e699	2017	2017	22420_1#42	SAMEA103981546	N/A	N/A	N/A	PRJEB20363	Klemm et al., 2018
ERR2093278	Pakistan	South Asia	4.3.1.1.P1	#c2e699	2017	2017	22420_1#43	SAMEA103981547	N/A	N/A	N/A	PRJEB20363	Klemm et al., 2018
ERR2093279	Pakistan	South Asia	4.3.1.1.P1	#c2e699	2017	2017	22420_1#44	SAMEA103981548	N/A	N/A	N/A	PRJEB20363	Klemm et al., 2018
ERR2093280	Pakistan	South Asia	4.3.1.1.P1	#c2e699	2017	2017	22420_1#45	SAMEA103981549	N/A	N/A	N/A	PRJEB20363	Klemm et al., 2018
ERR2093281	Pakistan	South Asia	4.3.1.1.P1	#c2e699	2017	2017	22420_1#46	SAMEA103981550	N/A	N/A	N/A	PRJEB20363	Klemm et al., 2018
ERR2093282	Pakistan	South Asia	4.3.1.1.P1	#c2e699	2017	2017	22420_1#47	SAMEA103981551	N/A	N/A	N/A	PRJEB20363	Klemm et al., 2018
ERR2093283	Pakistan	South Asia	4.3.1.1.P1	#c2e699	2017	2017	22420_1#48	SAMEA103981552	N/A	N/A	N/A	PRJEB20363	Klemm et al., 2018
ERR2093284	Pakistan	South Asia	4.3.1.1.P1	#c2e699	2017	2017	22420_1#49	SAMEA103981553	N/A	N/A	N/A	PRJEB20363	Klemm et al., 2018
ERR2093285	Pakistan	South Asia	4.3.1.1.P1	#c2e699	2017	2017	22420_1#50	SAMEA103981554	N/A	N/A	N/A	PRJEB20363	Klemm et al., 2018
ERR2093286	Pakistan	South Asia	4.3.1.1.P1	#c2e699	2017	2017	22420_1#51	SAMEA103981555	N/A	N/A	N/A	PRJEB20363	Klemm et al., 2018
ERR2093287	Pakistan	South Asia	4.3.1.1.P1	#c2e699	2017	2017	22420_1#52	SAMEA103981556	N/A	N/A	N/A	PRJEB20363	Klemm et al., 2018
ERR2093288	Pakistan	South Asia	4.3.1.1.P1	#c2e699	2017	2017	22420_1#53	SAMEA103981557	N/A	N/A	N/A	PRJEB20363	Klemm et al., 2018
ERR2093289	Pakistan	South Asia	4.3.1.1.P1	#c2e699	2017	2017	22420_1#54	SAMEA103981558	N/A	N/A	N/A	PRJEB20363	Klemm et al., 2018
ERR2093290	Pakistan	South Asia	4.3.1.1.P1	#c2e699	2017	2017	22420_1#55	SAMEA103981559	N/A	N/A	N/A	PRJEB20363	Klemm et al., 2018
ERR2093291	Pakistan	South Asia	4.3.1.1.P1	#c2e699	2017	2017	22420_1#56	SAMEA103981560	N/A	N/A	N/A	PRJEB20363	Klemm et al., 2018
ERR2093292	Pakistan	South Asia	4.3.1.1.P1	#c2e699	2017	2017	22420_1#57	SAMEA103981561	N/A	N/A	N/A	PRJEB20363	Klemm et al., 2018
ERR2093293	Pakistan	South Asia	4.3.1.1.P1	#c2e699	2017	2017	22420_1#58	SAMEA103981562	N/A	N/A	N/A	PRJEB20363	Klemm et al., 2018
ERR2093294	Pakistan	South Asia	4.3.1.1.P1	#c2e699	2017	2017	22420_1#59	SAMEA103981563	N/A	N/A	N/A	PRJEB20363	Klemm et al., 2018
ERR2093295	Pakistan	South Asia	4.3.1.1.P1	#c2e699	2017	2017	22420_1#60	SAMEA103981564	N/A	N/A	N/A	PRJEB20363	Klemm et al., 2018
ERR2093296	Pakistan	South Asia	4.3.1.1.P1	#c2e699	2017	2017	22420_1#61	SAMEA103981565	N/A	N/A	N/A	PRJEB20363	Klemm et al., 2018
ERR2093297	Pakistan	South Asia	4.3.1.1.P1	#c2e699	2017	2017	22420_1#62	SAMEA103981566	N/A	N/A	N/A	PRJEB20363	Klemm et al., 2018
ERR2093298	Pakistan	South Asia	4.3.1.1.P1	#c2e699	2017	2017	22420_1#63	SAMEA103981567	N/A	N/A	N/A	PRJEB20363	Klemm et al., 2018
ERR2093299	Pakistan	South Asia	4.3.1.1.P1	#c2e699	2017	2017	22420_1#64	SAMEA103981568	N/A	N/A	N/A	PRJEB20363	Klemm et al., 2018
ERR2093300	Pakistan	South Asia	4.3.1.1.P1	#c2e699	2017	2017	22420_1#65	SAMEA103981569	N/A	N/A	N/A	PRJEB20363	Klemm et al., 2018
ERR2093301	Pakistan	South Asia	4.3.1.1.P1	#c2e699	2017	2017	22420_1#66	SAMEA103981570	N/A	N/A	N/A	PRJEB20363	Klemm et al., 2018
ERR2093302	Pakistan	South Asia	4.3.1.1.P1	#c2e699	2017	2017	22420_1#67	SAMEA103981571	N/A	N/A	N/A	PRJEB20363	Klemm et al., 2018
ERR2093303	Pakistan	South Asia	4.3.1.1.P1	#c2e699	2017	2017	22420_1#68	SAMEA103981572	N/A	N/A	N/A	PRJEB20363	Klemm et al., 2018
ERR2093304	Pakistan	South Asia	4.3.1.1.P1	#c2e699	2017	2017	22420_1#69	SAMEA103981573	N/A	N/A	N/A	PRJEB20363	Klemm et al., 2018
ERR2093305	Pakistan	South Asia	4.3.1.1.P1	#c2e699	2017	2017	22420_1#70	SAMEA103981574	N/A	N/A	N/A	PRJEB20363	Klemm et al., 2018
ERR2093306	Pakistan	South Asia	4.3.1.1.P1	#c2e699	2017	2017	22420_1#71	SAMEA103981575	N/A	N/A	N/A	PRJEB20363	Klemm et al., 2018
ERR2093307	Pakistan	South Asia	4.3.1.1.P1	#c2e699	2017	2017	22420_1#72	SAMEA103981576	N/A	N/A	N/A	PRJEB20363	Klemm et al., 2018
ERR2093308	Pakistan	South Asia	4.3.1.1.P1	#c2e699	2017	2017	22420_1#73	SAMEA103981577	N/A	N/A	N/A	PRJEB20363	Klemm et al., 2018
ERR2093309	Pakistan	South Asia	4.3.1.1.P1	#c2e699	2017	2017	22420_1#74	SAMEA103981578	N/A	N/A	N/A	PRJEB20363	Klemm et al., 2018
ERR2093310	Pakistan	South Asia	4.3.1.1.P1	#c2e699	2017	2017	22420_1#75	SAMEA103981579	N/A	N/A	N/A	PRJEB20363	Klemm et al., 2018
ERR2093311	Pakistan	South Asia	4.3.1.1.P1	#c2e699	2017	2017	22420_1#76	SAMEA103981580	N/A	N/A	N/A	PRJEB20363	Klemm et al., 2018
ERR2093312	Pakistan	South Asia	4.3.1.1.P1	#c2e699	2017	2017	22420_1#77	SAMEA103981581	N/A	N/A	N/A	PRJEB20363	Klemm et al., 2018
ERR2093313	Pakistan	South Asia	4.3.1.1.P1	#c2e699	2017	2017	22420_1#78	SAMEA103981582	N/A	N/A	N/A	PRJEB20363	Klemm et al., 2018
ERR2093314	Pakistan	South Asia	4.3.1.1.P1	#c2e699	2017	2017	22420_1#79	SAMEA103981583	N/A	N/A	N/A	PRJEB20363	Klemm et al., 2018
ERR2093315	Pakistan	South Asia	4.3.1.1.P1	#c2e699	2017	2017	22420_1#80	SAMEA103981584	N/A	N/A	N/A	PRJEB20363	Klemm et al., 2018
ERR2093316	Pakistan	South Asia	4.3.1.1.P1	#c2e699	2017	2017	22420_1#81	SAMEA103981585	N/A	N/A	N/A	PRJEB20363	Klemm et al., 2018
ERR2093317	Pakistan	South Asia	4.3.1.1.P1	#c2e699	2017	2017	22420_1#82	SAMEA103981586	N/A	N/A	N/A	PRJEB20363	Klemm et al., 2018
ERR2093318	Pakistan	South Asia	4.3.1.1.P1	#c2e699	2017	2017	22420_1#83	SAMEA103981587	N/A	N/A	N/A	PRJEB20363	Klemm et al., 2018
ERR2093319	Pakistan	South Asia	4.3.1.1.P1	#c2e699	2017	2017	22420_1#84	SAMEA103981588	N/A	N/A	N/A	PRJEB20363	Klemm et al., 2018
ERR2093320	Pakistan	South Asia	4.3.1.1.P1	#c2e699	2017	2017	22420_1#85	SAMEA103981589	N/A	N/A	N/A	PRJEB20363	Klemm et al., 2018
ERR2093321	Pakistan	South Asia	4.3.1.1.P1	#c2e699	2017	2017	22420_1#86	SAMEA103981590	N/A	N/A	N/A	PRJEB20363	Klemm et al., 2018
ERR2093322	Pakistan	South Asia	4.3.1.1.P1	#c2e699	2017	2017	22420_1#87	SAMEA103981591	N/A	N/A	N/A	PRJEB20363	Klemm et al., 2018
ERR2093334	Pakistan	South Asia	4.3.1.1.P1	#ffffcc	2016	2016	22420_1#99	SAMEA103981503	N/A	N/A	N/A	PRJEB20363	Klemm et al., 2018
SRR6760633	Pakistan	South Asia	4.3.1.1.P1	#78c679	2018	2018	PNUSAS034280	SAMN08579889	GCA_010538415.1	PDT000288389.2	AAOAGR01	PRJNA230403	NARMS
SRR7514397	Pakistan	South Asia	4.3.1.1.P1	#78c679	2018	2018	PNUSAS044905	SAMN09650525	GCA_006596985.1	PDT000347126.1	AAFSOE01	PRJNA230403	NARMS
SRR7703122	Pakistan	South Asia	4.3.1.1.P1	#78c679	2018	2018	2018K-0827	SAMN09843973	GCA_006733285.1	PDT000364073.1	AAGCUC01	PRJNA230403	NARMS
SRR8322028	Pakistan	South Asia	4.3.1.1.P1	#78c679	2018	2018	PNUSAS063027	SAMN10597673	GCA_005817945.1	PDT000418016.1	AADWAF01	PRJNA230403	NARMS
SRR8530445	Pakistan	South Asia	4.3.1.1.P1	#78c679	2018	2018	PNUSAS065938	SAMN10873457	GCA_005732275.1	PDT000459127.1	AADRDN01	PRJNA230403	NARMS
SRR8568117	Pakistan	South Asia	4.3.1.1.P1	#78c679	2018	2018	PNUSAS067780	SAMN10921753	GCA_005488865.1	PDT000465394.1	AADABO01	PRJNA230403	NARMS
SRR8575656	Pakistan	South Asia	4.3.1.1.P1	#78c679	2018	2018	PNUSAS067607	SAMN10938816	GCA_005489515.1	PDT000465949.1	AADACR01	PRJNA230403	NARMS
ERR4025178	Pakistan	South Asia	4.3.1.1.P1	#78c679	2018-08-27	2018	28933_2#10	SAMEA5189047	N/A	N/A	N/A	PRJEB30334	da Silva et al., 2022
ERR4025282	Pakistan	South Asia	4.3.1.1.P1	#c2e699	2017-08-03	2017	28933_2#114	SAMEA5188479	N/A	N/A	N/A	PRJEB30334	da Silva et al., 2022
ERR4025283	Pakistan	South Asia	4.3.1.1.P1	#c2e699	2017-06-07	2017	28933_2#115	SAMEA5188395	N/A	N/A	N/A	PRJEB30334	da Silva et al., 2022
ERR4025301	Pakistan	South Asia	4.3.1.1.P1	#c2e699	2017-05-24	2017	28933_2#133	SAMEA5188384	N/A	N/A	N/A	PRJEB30334	da Silva et al., 2022
ERR4025182	Pakistan	South Asia	4.3.1.1.P1	#78c679	2018-08-31	2018	28933_2#14	SAMEA5189025	N/A	N/A	N/A	PRJEB30334	da Silva et al., 2022
ERR4025314	Pakistan	South Asia	4.3.1.1.P1	#c2e699	2017-09-06	2017	28933_2#146	SAMEA5188487	N/A	N/A	N/A	PRJEB30334	da Silva et al., 2022
ERR4025327	Pakistan	South Asia	4.3.1.1.P1	#c2e699	2017-10-18	2017	28933_2#159	SAMEA5188514	N/A	N/A	N/A	PRJEB30334	da Silva et al., 2022
ERR4025330	Pakistan	South Asia	4.3.1.1.P1	#c2e699	2017-09-05	2017	28933_2#162	SAMEA5188491	N/A	N/A	N/A	PRJEB30334	da Silva et al., 2022
ERR4025334	Pakistan	South Asia	4.3.1.1.P1	#ffffcc	2016-11-05	2016	28933_2#166	SAMEA5188492	N/A	N/A	N/A	PRJEB30334	da Silva et al., 2022
ERR4025346	Pakistan	South Asia	4.3.1.1.P1	#c2e699	2017-01-01	2017	28933_2#178	SAMEA5188495	N/A	N/A	N/A	PRJEB30334	da Silva et al., 2022
ERR4025350	Pakistan	South Asia	4.3.1.1.P1	#c2e699	2017-09-18	2017	28933_2#182	SAMEA5188496	N/A	N/A	N/A	PRJEB30334	da Silva et al., 2022
ERR4025187	Pakistan	South Asia	4.3.1.1.P1	#78c679	2018-08-31	2018	28933_2#19	SAMEA5189026	N/A	N/A	N/A	PRJEB30334	da Silva et al., 2022
ERR4025364	Pakistan	South Asia	4.3.1.1.P1	#c2e699	2017-10-16	2017	28933_2#196	SAMEA5188545	N/A	N/A	N/A	PRJEB30334	da Silva et al., 2022
ERR4025368	Pakistan	South Asia	4.3.1.1.P1	#c2e699	2017-10-19	2017	28933_2#200	SAMEA5188526	N/A	N/A	N/A	PRJEB30334	da Silva et al., 2022
ERR4025373	Pakistan	South Asia	4.3.1.1.P1	#c2e699	2017-03-09	2017	28933_2#205	SAMEA5188290	N/A	N/A	N/A	PRJEB30334	da Silva et al., 2022
ERR4025375	Pakistan	South Asia	4.3.1.1.P1	#c2e699	2017-09-09	2017	28933_2#207	SAMEA5188502	N/A	N/A	N/A	PRJEB30334	da Silva et al., 2022
ERR4025386	Pakistan	South Asia	4.3.1.1.P1	#c2e699	2017-06-03	2017	28933_2#218	SAMEA5188405	N/A	N/A	N/A	PRJEB30334	da Silva et al., 2022
ERR4025390	Pakistan	South Asia	4.3.1.1.P1	#c2e699	2017-06-08	2017	28933_2#222	SAMEA5188406	N/A	N/A	N/A	PRJEB30334	da Silva et al., 2022
ERR4025393	Pakistan	South Asia	4.3.1.1.P1	#c2e699	2017-03-16	2017	28933_2#225	SAMEA5188313	N/A	N/A	N/A	PRJEB30334	da Silva et al., 2022
ERR4025400	Pakistan	South Asia	4.3.1.1.P1	#78c679	2018-04-25	2018	28933_2#232	SAMEA5188702	N/A	N/A	N/A	PRJEB30334	da Silva et al., 2022
ERR4025403	Pakistan	South Asia	4.3.1.1.P1	#c2e699	2017-09-12	2017	28933_2#235	SAMEA5188508	N/A	N/A	N/A	PRJEB30334	da Silva et al., 2022
ERR4025414	Pakistan	South Asia	4.3.1.1.P1	#c2e699	2017-06-15	2017	28933_2#246	SAMEA5188413	N/A	N/A	N/A	PRJEB30334	da Silva et al., 2022
ERR4025420	Pakistan	South Asia	4.3.1.1.P1	#78c679	2018-05-07	2018	28933_2#252	SAMEA5188722	N/A	N/A	N/A	PRJEB30334	da Silva et al., 2022
ERR4025422	Pakistan	South Asia	4.3.1.1.P1	#c2e699	2017-06-29	2017	28933_2#254	SAMEA5188421	N/A	N/A	N/A	PRJEB30334	da Silva et al., 2022
ERR4025423	Pakistan	South Asia	4.3.1.1.P1	#c2e699	2017-09-23	2017	28933_2#255	SAMEA5188513	N/A	N/A	N/A	PRJEB30334	da Silva et al., 2022
ERR4025424	Pakistan	South Asia	4.3.1.1.P1	#78c679	2018-05-11	2018	28933_2#256	SAMEA5188752	N/A	N/A	N/A	PRJEB30334	da Silva et al., 2022
ERR4025431	Pakistan	South Asia	4.3.1.1.P1	#c2e699	2017-09-25	2017	28933_2#263	SAMEA5188515	N/A	N/A	N/A	PRJEB30334	da Silva et al., 2022
ERR4025436	Pakistan	South Asia	4.3.1.1.P1	#78c679	2018-05-18	2018	28933_2#268	SAMEA5188755	N/A	N/A	N/A	PRJEB30334	da Silva et al., 2022
ERR4025439	Pakistan	South Asia	4.3.1.1.P1	#c2e699	2017-10-07	2017	28933_2#271	SAMEA5188517	N/A	N/A	N/A	PRJEB30334	da Silva et al., 2022
ERR4025444	Pakistan	South Asia	4.3.1.1.P1	#78c679	2018-05-17	2018	28933_2#276	SAMEA5188760	N/A	N/A	N/A	PRJEB30334	da Silva et al., 2022
ERR4025447	Pakistan	South Asia	4.3.1.1.P1	#c2e699	2017-10-07	2017	28933_2#279	SAMEA5188519	N/A	N/A	N/A	PRJEB30334	da Silva et al., 2022
ERR4025448	Pakistan	South Asia	4.3.1.1.P1	#78c679	2018-05-18	2018	28933_2#280	SAMEA5188761	N/A	N/A	N/A	PRJEB30334	da Silva et al., 2022
ERR4025449	Pakistan	South Asia	4.3.1.1.P1	#78c679	2018-05-17	2018	28933_2#281	SAMEA5188762	N/A	N/A	N/A	PRJEB30334	da Silva et al., 2022
ERR4025452	Pakistan	South Asia	4.3.1.1.P1	#c2e699	2017-03-30	2017	28933_2#284	SAMEA5188521	N/A	N/A	N/A	PRJEB30334	da Silva et al., 2022
ERR4025453	Pakistan	South Asia	4.3.1.1.P1	#78c679	2018-05-18	2018	28933_2#285	SAMEA5188769	N/A	N/A	N/A	PRJEB30334	da Silva et al., 2022
ERR4025457	Pakistan	South Asia	4.3.1.1.P1	#78c679	2018-05-18	2018	28933_2#289	SAMEA5188773	N/A	N/A	N/A	PRJEB30334	da Silva et al., 2022
ERR4025197	Pakistan	South Asia	4.3.1.1.P1	#c2e699	2017-08-09	2017	28933_2#29	SAMEA5188461	N/A	N/A	N/A	PRJEB30334	da Silva et al., 2022
ERR4025465	Pakistan	South Asia	4.3.1.1.P1	#78c679	2018-05-22	2018	28933_2#297	SAMEA5188775	N/A	N/A	N/A	PRJEB30334	da Silva et al., 2022
ERR4025469	Pakistan	South Asia	4.3.1.1.P1	#78c679	2018-05-30	2018	28933_2#301	SAMEA5188794	N/A	N/A	N/A	PRJEB30334	da Silva et al., 2022
ERR4025474	Pakistan	South Asia	4.3.1.1.P1	#c2e699	2017-03-25	2017	28933_2#306	SAMEA5188321	N/A	N/A	N/A	PRJEB30334	da Silva et al., 2022
ERR4025199	Pakistan	South Asia	4.3.1.1.P1	#78c679	2018-09-07	2018	28933_2#31	SAMEA5189053	N/A	N/A	N/A	PRJEB30334	da Silva et al., 2022
ERR4025482	Pakistan	South Asia	4.3.1.1.P1	#78c679	2018-06-19	2018	28933_2#314	SAMEA5188850	N/A	N/A	N/A	PRJEB30334	da Silva et al., 2022
ERR4025485	Pakistan	South Asia	4.3.1.1.P1	#c2e699	2017-10-04	2017	28933_2#317	SAMEA5188541	N/A	N/A	N/A	PRJEB30334	da Silva et al., 2022
ERR4025486	Pakistan	South Asia	4.3.1.1.P1	#78c679	2018-06-19	2018	28933_2#318	SAMEA5188853	N/A	N/A	N/A	PRJEB30334	da Silva et al., 2022
ERR4025488	Pakistan	South Asia	4.3.1.1.P1	#c2e699	2017-07-26	2017	28933_2#320	SAMEA5188438	N/A	N/A	N/A	PRJEB30334	da Silva et al., 2022
ERR4025490	Pakistan	South Asia	4.3.1.1.P1	#78c679	2018-06-19	2018	28933_2#322	SAMEA5188854	N/A	N/A	N/A	PRJEB30334	da Silva et al., 2022
ERR4025491	Pakistan	South Asia	4.3.1.1.P1	#c2e699	2017-04-19	2017	28933_2#323	SAMEA5188325	N/A	N/A	N/A	PRJEB30334	da Silva et al., 2022
ERR4025494	Pakistan	South Asia	4.3.1.1.P1	#78c679	2018-06-19	2018	28933_2#326	SAMEA5188855	N/A	N/A	N/A	PRJEB30334	da Silva et al., 2022
ERR4025496	Pakistan	South Asia	4.3.1.1.P1	#c2e699	2017-07-26	2017	28933_2#328	SAMEA5188440	N/A	N/A	N/A	PRJEB30334	da Silva et al., 2022
ERR4025497	Pakistan	South Asia	4.3.1.1.P1	#c2e699	2017-10-07	2017	28933_2#329	SAMEA5188543	N/A	N/A	N/A	PRJEB30334	da Silva et al., 2022
ERR4025201	Pakistan	South Asia	4.3.1.1.P1	#c2e699	2017-08-10	2017	28933_2#33	SAMEA5188462	N/A	N/A	N/A	PRJEB30334	da Silva et al., 2022
ERR4025498	Pakistan	South Asia	4.3.1.1.P1	#78c679	2018-06-19	2018	28933_2#330	SAMEA5188856	N/A	N/A	N/A	PRJEB30334	da Silva et al., 2022
ERR4025501	Pakistan	South Asia	4.3.1.1.P1	#c2e699	2017-10-13	2017	28933_2#333	SAMEA5188544	N/A	N/A	N/A	PRJEB30334	da Silva et al., 2022
ERR4025502	Pakistan	South Asia	4.3.1.1.P1	#78c679	2018-08-09	2018	28933_2#334	SAMEA5188859	N/A	N/A	N/A	PRJEB30334	da Silva et al., 2022
ERR4025505	Pakistan	South Asia	4.3.1.1.P1	#c2e699	2017-10-16	2017	28933_2#337	SAMEA5188525	N/A	N/A	N/A	PRJEB30334	da Silva et al., 2022
ERR4025510	Pakistan	South Asia	4.3.1.1.P1	#78c679	2018-06-19	2018	28933_2#342	SAMEA5188860	N/A	N/A	N/A	PRJEB30334	da Silva et al., 2022
ERR4025517	Pakistan	South Asia	4.3.1.1.P1	#c2e699	2017-10-23	2017	28933_2#349	SAMEA5188529	N/A	N/A	N/A	PRJEB30334	da Silva et al., 2022
ERR4025522	Pakistan	South Asia	4.3.1.1.P1	#78c679	2018-07-18	2018	28933_2#354	SAMEA5188926	N/A	N/A	N/A	PRJEB30334	da Silva et al., 2022
ERR4025526	Pakistan	South Asia	4.3.1.1.P1	#78c679	2018-06-23	2018	28933_2#358	SAMEA5188936	N/A	N/A	N/A	PRJEB30334	da Silva et al., 2022
ERR4025534	Pakistan	South Asia	4.3.1.1.P1	#78c679	2018-07-23	2018	28933_2#366	SAMEA5188946	N/A	N/A	N/A	PRJEB30334	da Silva et al., 2022
ERR4025535	Pakistan	South Asia	4.3.1.1.P1	#c2e699	2017-05-02	2017	28933_2#367	SAMEA5188336	N/A	N/A	N/A	PRJEB30334	da Silva et al., 2022
ERR4025537	Pakistan	South Asia	4.3.1.1.P1	#c2e699	2017-11-03	2017	28933_2#369	SAMEA5188551	N/A	N/A	N/A	PRJEB30334	da Silva et al., 2022
ERR4025538	Pakistan	South Asia	4.3.1.1.P1	#78c679	2018-07-27	2018	28933_2#370	SAMEA5188951	N/A	N/A	N/A	PRJEB30334	da Silva et al., 2022
ERR4025542	Pakistan	South Asia	4.3.1.1.P1	#78c679	2018-07-26	2018	28933_2#374	SAMEA5188952	N/A	N/A	N/A	PRJEB30334	da Silva et al., 2022
ERR4025549	Pakistan	South Asia	4.3.1.1.P1	#c2e699	2017-10-30	2017	28933_2#381	SAMEA5188553	N/A	N/A	N/A	PRJEB30334	da Silva et al., 2022
ERR4025211	Pakistan	South Asia	4.3.1.1.P1	#78c679	2018-09-24	2018	28933_2#43	SAMEA5189086	N/A	N/A	N/A	PRJEB30334	da Silva et al., 2022
ERR4025215	Pakistan	South Asia	4.3.1.1.P1	#78c679	2018-09-19	2018	28933_2#47	SAMEA5189090	N/A	N/A	N/A	PRJEB30334	da Silva et al., 2022
ERR4025219	Pakistan	South Asia	4.3.1.1.P1	#78c679	2018-10-02	2018	28933_2#51	SAMEA5189117	N/A	N/A	N/A	PRJEB30334	da Silva et al., 2022
ERR4025227	Pakistan	South Asia	4.3.1.1.P1	#78c679	2018-01-29	2018	28933_2#59	SAMEA5189190	N/A	N/A	N/A	PRJEB30334	da Silva et al., 2022
ERR4025233	Pakistan	South Asia	4.3.1.1.P1	#c2e699	2017-08-23	2017	28933_2#65	SAMEA5899998	N/A	N/A	N/A	PRJEB30334	da Silva et al., 2022
ERR4025241	Pakistan	South Asia	4.3.1.1.P1	#c2e699	2017-08-18	2017	28933_2#73	SAMEA5188470	N/A	N/A	N/A	PRJEB30334	da Silva et al., 2022
ERR4025176	Pakistan	South Asia	4.3.1.1.P1	#c2e699	2017-07-04	2017	28933_2#8	SAMEA5188455	N/A	N/A	N/A	PRJEB30334	da Silva et al., 2022
ERR4025251	Pakistan	South Asia	4.3.1.1.P1	#c2e699	2017-01-10	2017	28933_2#83	SAMEA5188253	N/A	N/A	N/A	PRJEB30334	da Silva et al., 2022
ERR4025253	Pakistan	South Asia	4.3.1.1.P1	#c2e699	2017-09-05	2017	28933_2#85	SAMEA5188473	N/A	N/A	N/A	PRJEB30334	da Silva et al., 2022
ERR4025255	Pakistan	South Asia	4.3.1.1.P1	#c2e699	2017-01-03	2017	28933_2#87	SAMEA5188254	N/A	N/A	N/A	PRJEB30334	da Silva et al., 2022
ERR4025257	Pakistan	South Asia	4.3.1.1.P1	#c2e699	2017-08-29	2017	28933_2#89	SAMEA5188474	N/A	N/A	N/A	PRJEB30334	da Silva et al., 2022
ERR4025265	Pakistan	South Asia	4.3.1.1.P1	#c2e699	2017-09-05	2017	28933_2#97	SAMEA5188476	N/A	N/A	N/A	PRJEB30334	da Silva et al., 2022
ERR4025553	Pakistan	South Asia	4.3.1.1.P1	#78c679	2018-07-28	2018	29050_1#1	SAMEA5188960	N/A	N/A	N/A	PRJEB30334	da Silva et al., 2022
ERR4025560	Pakistan	South Asia	4.3.1.1.P1	#78c679	2018-08-24	2018	29050_1#10	SAMEA5189063	N/A	N/A	N/A	PRJEB30334	da Silva et al., 2022
ERR4025628	Pakistan	South Asia	4.3.1.1.P1	#78c679	2018-08-08	2018	29050_1#101	SAMEA5188984	N/A	N/A	N/A	PRJEB30334	da Silva et al., 2022
ERR4025629	Pakistan	South Asia	4.3.1.1.P1	#78c679	2018-09-24	2018	29050_1#102	SAMEA5189088	N/A	N/A	N/A	PRJEB30334	da Silva et al., 2022
ERR4025630	Pakistan	South Asia	4.3.1.1.P1	#78c679	2018-11-16	2018	29050_1#104	SAMEA5189179	N/A	N/A	N/A	PRJEB30334	da Silva et al., 2022
ERR4025632	Pakistan	South Asia	4.3.1.1.P1	#78c679	2018-08-08	2018	29050_1#106	SAMEA5188985	N/A	N/A	N/A	PRJEB30334	da Silva et al., 2022
ERR4025633	Pakistan	South Asia	4.3.1.1.P1	#78c679	2018-09-08	2018	29050_1#107	SAMEA5189089	N/A	N/A	N/A	PRJEB30334	da Silva et al., 2022
ERR4025634	Pakistan	South Asia	4.3.1.1.P1	#78c679	2018-09-22	2018	29050_1#109	SAMEA5189091	N/A	N/A	N/A	PRJEB30334	da Silva et al., 2022
ERR4025635	Pakistan	South Asia	4.3.1.1.P1	#78c679	2018-08-09	2018	29050_1#110	SAMEA5188986	N/A	N/A	N/A	PRJEB30334	da Silva et al., 2022
ERR4025637	Pakistan	South Asia	4.3.1.1.P1	#78c679	2018-11-15	2018	29050_1#113	SAMEA5189182	N/A	N/A	N/A	PRJEB30334	da Silva et al., 2022
ERR4025638	Pakistan	South Asia	4.3.1.1.P1	#78c679	2018-09-25	2018	29050_1#114	SAMEA5189092	N/A	N/A	N/A	PRJEB30334	da Silva et al., 2022
ERR4025640	Pakistan	South Asia	4.3.1.1.P1	#78c679	2018-09-18	2018	29050_1#117	SAMEA5189093	N/A	N/A	N/A	PRJEB30334	da Silva et al., 2022
ERR4025641	Pakistan	South Asia	4.3.1.1.P1	#78c679	2018-08-13	2018	29050_1#118	SAMEA5188988	N/A	N/A	N/A	PRJEB30334	da Silva et al., 2022
ERR4025561	Pakistan	South Asia	4.3.1.1.P1	#78c679	2018-10-31	2018	29050_1#12	SAMEA5189158	N/A	N/A	N/A	PRJEB30334	da Silva et al., 2022
ERR4025642	Pakistan	South Asia	4.3.1.1.P1	#78c679	2018-11-17	2018	29050_1#120	SAMEA5189183	N/A	N/A	N/A	PRJEB30334	da Silva et al., 2022
ERR4025643	Pakistan	South Asia	4.3.1.1.P1	#78c679	2018-11-16	2018	29050_1#121	SAMEA5189184	N/A	N/A	N/A	PRJEB30334	da Silva et al., 2022
ERR4025644	Pakistan	South Asia	4.3.1.1.P1	#78c679	2018-09-24	2018	29050_1#122	SAMEA5189094	N/A	N/A	N/A	PRJEB30334	da Silva et al., 2022
ERR4025645	Pakistan	South Asia	4.3.1.1.P1	#78c679	2018-08-03	2018	29050_1#123	SAMEA5188989	N/A	N/A	N/A	PRJEB30334	da Silva et al., 2022
ERR4025647	Pakistan	South Asia	4.3.1.1.P1	#78c679	2018-09-11	2018	29050_1#127	SAMEA5189095	N/A	N/A	N/A	PRJEB30334	da Silva et al., 2022
ERR4025648	Pakistan	South Asia	4.3.1.1.P1	#78c679	2018-08-15	2018	29050_1#128	SAMEA5188991	N/A	N/A	N/A	PRJEB30334	da Silva et al., 2022
ERR4025649	Pakistan	South Asia	4.3.1.1.P1	#78c679	2018-09-15	2018	29050_1#129	SAMEA5189096	N/A	N/A	N/A	PRJEB30334	da Silva et al., 2022
ERR4025562	Pakistan	South Asia	4.3.1.1.P1	#78c679	2018-11-03	2018	29050_1#13	SAMEA5189159	N/A	N/A	N/A	PRJEB30334	da Silva et al., 2022
ERR4025650	Pakistan	South Asia	4.3.1.1.P1	#78c679	2018-08-11	2018	29050_1#130	SAMEA5188992	N/A	N/A	N/A	PRJEB30334	da Silva et al., 2022
ERR4025653	Pakistan	South Asia	4.3.1.1.P1	#78c679	2018-09-28	2018	29050_1#134	SAMEA5189097	N/A	N/A	N/A	PRJEB30334	da Silva et al., 2022
ERR4025654	Pakistan	South Asia	4.3.1.1.P1	#78c679	2018-08-11	2018	29050_1#135	SAMEA5188993	N/A	N/A	N/A	PRJEB30334	da Silva et al., 2022
ERR4025655	Pakistan	South Asia	4.3.1.1.P1	#78c679	2018-09-29	2018	29050_1#137	SAMEA5189098	N/A	N/A	N/A	PRJEB30334	da Silva et al., 2022
ERR4025656	Pakistan	South Asia	4.3.1.1.P1	#78c679	2018-08-11	2018	29050_1#138	SAMEA5188994	N/A	N/A	N/A	PRJEB30334	da Silva et al., 2022
ERR4025658	Pakistan	South Asia	4.3.1.1.P1	#c2e699	2017-12-26	2017	29050_1#141	SAMEA5900043	N/A	N/A	N/A	PRJEB30334	da Silva et al., 2022
ERR4025659	Pakistan	South Asia	4.3.1.1.P1	#78c679	2018-09-28	2018	29050_1#142	SAMEA5189099	N/A	N/A	N/A	PRJEB30334	da Silva et al., 2022
ERR4025660	Pakistan	South Asia	4.3.1.1.P1	#78c679	2018-08-10	2018	29050_1#143	SAMEA5188995	N/A	N/A	N/A	PRJEB30334	da Silva et al., 2022
ERR4025663	Pakistan	South Asia	4.3.1.1.P1	#78c679	2018-02-01	2018	29050_1#148	SAMEA5189191	N/A	N/A	N/A	PRJEB30334	da Silva et al., 2022
ERR4025664	Pakistan	South Asia	4.3.1.1.P1	#78c679	2018-04-12	2018	29050_1#149	SAMEA5189192	N/A	N/A	N/A	PRJEB30334	da Silva et al., 2022
ERR4025666	Pakistan	South Asia	4.3.1.1.P1	#78c679	2018-08-10	2018	29050_1#151	SAMEA5188997	N/A	N/A	N/A	PRJEB30334	da Silva et al., 2022
ERR4025667	Pakistan	South Asia	4.3.1.1.P1	#78c679	2018-10-03	2018	29050_1#153	SAMEA5189101	N/A	N/A	N/A	PRJEB30334	da Silva et al., 2022
ERR4025668	Pakistan	South Asia	4.3.1.1.P1	#78c679	2018-08-10	2018	29050_1#154	SAMEA5188998	N/A	N/A	N/A	PRJEB30334	da Silva et al., 2022
ERR4025671	Pakistan	South Asia	4.3.1.1.P1	#78c679	2018-10-08	2018	29050_1#158	SAMEA5189102	N/A	N/A	N/A	PRJEB30334	da Silva et al., 2022
ERR4025672	Pakistan	South Asia	4.3.1.1.P1	#78c679	2018-08-17	2018	29050_1#159	SAMEA5189000	N/A	N/A	N/A	PRJEB30334	da Silva et al., 2022
ERR4025673	Pakistan	South Asia	4.3.1.1.P1	#78c679	2018-09-29	2018	29050_1#161	SAMEA5189103	N/A	N/A	N/A	PRJEB30334	da Silva et al., 2022
ERR4025675	Pakistan	South Asia	4.3.1.1.P1	#78c679	2018-10-03	2018	29050_1#166	SAMEA5189104	N/A	N/A	N/A	PRJEB30334	da Silva et al., 2022
ERR4025676	Pakistan	South Asia	4.3.1.1.P1	#78c679	2018-08-17	2018	29050_1#167	SAMEA5189002	N/A	N/A	N/A	PRJEB30334	da Silva et al., 2022
ERR4025677	Pakistan	South Asia	4.3.1.1.P1	#78c679	2018-10-08	2018	29050_1#169	SAMEA5189105	N/A	N/A	N/A	PRJEB30334	da Silva et al., 2022
ERR4025565	Pakistan	South Asia	4.3.1.1.P1	#78c679	2018-07-31	2018	29050_1#17	SAMEA5188964	N/A	N/A	N/A	PRJEB30334	da Silva et al., 2022
ERR4025680	Pakistan	South Asia	4.3.1.1.P1	#78c679	2018-08-18	2018	29050_1#175	SAMEA5189004	N/A	N/A	N/A	PRJEB30334	da Silva et al., 2022
ERR4025681	Pakistan	South Asia	4.3.1.1.P1	#78c679	2018-09-27	2018	29050_1#177	SAMEA5189107	N/A	N/A	N/A	PRJEB30334	da Silva et al., 2022
ERR4025682	Pakistan	South Asia	4.3.1.1.P1	#78c679	2018-08-16	2018	29050_1#178	SAMEA5189005	N/A	N/A	N/A	PRJEB30334	da Silva et al., 2022
ERR4025566	Pakistan	South Asia	4.3.1.1.P1	#78c679	2018-09-14	2018	29050_1#18	SAMEA5189065	N/A	N/A	N/A	PRJEB30334	da Silva et al., 2022
ERR4025683	Pakistan	South Asia	4.3.1.1.P1	#78c679	2018-10-05	2018	29050_1#182	SAMEA5189108	N/A	N/A	N/A	PRJEB30334	da Silva et al., 2022
ERR4025684	Pakistan	South Asia	4.3.1.1.P1	#78c679	2018-08-15	2018	29050_1#183	SAMEA5189006	N/A	N/A	N/A	PRJEB30334	da Silva et al., 2022
ERR4025685	Pakistan	South Asia	4.3.1.1.P1	#78c679	2018-10-05	2018	29050_1#185	SAMEA5189109	N/A	N/A	N/A	PRJEB30334	da Silva et al., 2022
ERR4025688	Pakistan	South Asia	4.3.1.1.P1	#78c679	2018-08-13	2018	29050_1#191	SAMEA5189009	N/A	N/A	N/A	PRJEB30334	da Silva et al., 2022
ERR4025691	Pakistan	South Asia	4.3.1.1.P1	#78c679	2018-08-18	2018	29050_1#197	SAMEA5189011	N/A	N/A	N/A	PRJEB30334	da Silva et al., 2022
ERR4025692	Pakistan	South Asia	4.3.1.1.P1	#78c679	2018-10-13	2018	29050_1#198	SAMEA5189112	N/A	N/A	N/A	PRJEB30334	da Silva et al., 2022
ERR4025554	Pakistan	South Asia	4.3.1.1.P1	#78c679	2018-09-12	2018	29050_1#2	SAMEA5189061	N/A	N/A	N/A	PRJEB30334	da Silva et al., 2022
ERR4025567	Pakistan	South Asia	4.3.1.1.P1	#78c679	2018-11-03	2018	29050_1#20	SAMEA5189160	N/A	N/A	N/A	PRJEB30334	da Silva et al., 2022
ERR4025693	Pakistan	South Asia	4.3.1.1.P1	#78c679	2018-07-26	2018	29050_1#202	SAMEA5189012	N/A	N/A	N/A	PRJEB30334	da Silva et al., 2022
ERR4025696	Pakistan	South Asia	4.3.1.1.P1	#78c679	2018-10-01	2018	29050_1#206	SAMEA5900037	N/A	N/A	N/A	PRJEB30334	da Silva et al., 2022
ERR4025697	Pakistan	South Asia	4.3.1.1.P1	#78c679	2018-07-27	2018	29050_1#210	SAMEA5189014	N/A	N/A	N/A	PRJEB30334	da Silva et al., 2022
ERR4025698	Pakistan	South Asia	4.3.1.1.P1	#78c679	2018-10-03	2018	29050_1#211	SAMEA5189114	N/A	N/A	N/A	PRJEB30334	da Silva et al., 2022
ERR4025700	Pakistan	South Asia	4.3.1.1.P1	#78c679	2018-10-08	2018	29050_1#214	SAMEA5189115	N/A	N/A	N/A	PRJEB30334	da Silva et al., 2022
ERR4025701	Pakistan	South Asia	4.3.1.1.P1	#78c679	2018-08-01	2018	29050_1#218	SAMEA5189016	N/A	N/A	N/A	PRJEB30334	da Silva et al., 2022
ERR4025702	Pakistan	South Asia	4.3.1.1.P1	#78c679	2018-10-08	2018	29050_1#219	SAMEA5189116	N/A	N/A	N/A	PRJEB30334	da Silva et al., 2022
ERR4025703	Pakistan	South Asia	4.3.1.1.P1	#78c679	2018-08-20	2018	29050_1#221	SAMEA5189017	N/A	N/A	N/A	PRJEB30334	da Silva et al., 2022
ERR4025704	Pakistan	South Asia	4.3.1.1.P1	#78c679	2018-10-13	2018	29050_1#222	SAMEA5189118	N/A	N/A	N/A	PRJEB30334	da Silva et al., 2022
ERR4025705	Pakistan	South Asia	4.3.1.1.P1	#78c679	2018-08-25	2018	29050_1#226	SAMEA5189018	N/A	N/A	N/A	PRJEB30334	da Silva et al., 2022
ERR4025707	Pakistan	South Asia	4.3.1.1.P1	#78c679	2018-08-25	2018	29050_1#229	SAMEA5189019	N/A	N/A	N/A	PRJEB30334	da Silva et al., 2022
ERR4025570	Pakistan	South Asia	4.3.1.1.P1	#78c679	2018-09-13	2018	29050_1#23	SAMEA5189066	N/A	N/A	N/A	PRJEB30334	da Silva et al., 2022
ERR4025709	Pakistan	South Asia	4.3.1.1.P1	#78c679	2018-08-25	2018	29050_1#234	SAMEA5900032	N/A	N/A	N/A	PRJEB30334	da Silva et al., 2022
ERR4025710	Pakistan	South Asia	4.3.1.1.P1	#78c679	2018-10-09	2018	29050_1#235	SAMEA5189121	N/A	N/A	N/A	PRJEB30334	da Silva et al., 2022
ERR4025711	Pakistan	South Asia	4.3.1.1.P1	#78c679	2018-08-29	2018	29050_1#237	SAMEA5189020	N/A	N/A	N/A	PRJEB30334	da Silva et al., 2022
ERR4025712	Pakistan	South Asia	4.3.1.1.P1	#78c679	2018-10-12	2018	29050_1#238	SAMEA5189122	N/A	N/A	N/A	PRJEB30334	da Silva et al., 2022
ERR4025714	Pakistan	South Asia	4.3.1.1.P1	#78c679	2018-10-11	2018	29050_1#243	SAMEA5189123	N/A	N/A	N/A	PRJEB30334	da Silva et al., 2022
ERR4025715	Pakistan	South Asia	4.3.1.1.P1	#78c679	2018-08-28	2018	29050_1#245	SAMEA5189022	N/A	N/A	N/A	PRJEB30334	da Silva et al., 2022
ERR4025716	Pakistan	South Asia	4.3.1.1.P1	#78c679	2018-10-13	2018	29050_1#246	SAMEA5189124	N/A	N/A	N/A	PRJEB30334	da Silva et al., 2022
ERR4025717	Pakistan	South Asia	4.3.1.1.P1	#78c679	2018-08-25	2018	29050_1#250	SAMEA5189046	N/A	N/A	N/A	PRJEB30334	da Silva et al., 2022
ERR4025719	Pakistan	South Asia	4.3.1.1.P1	#78c679	2018-08-24	2018	29050_1#255	SAMEA5900033	N/A	N/A	N/A	PRJEB30334	da Silva et al., 2022
ERR4025720	Pakistan	South Asia	4.3.1.1.P1	#78c679	2018-10-12	2018	29050_1#256	SAMEA5189126	N/A	N/A	N/A	PRJEB30334	da Silva et al., 2022
ERR4025572	Pakistan	South Asia	4.3.1.1.P1	#78c679	2018-09-14	2018	29050_1#26	SAMEA5189067	N/A	N/A	N/A	PRJEB30334	da Silva et al., 2022
ERR4025723	Pakistan	South Asia	4.3.1.1.P1	#78c679	2018-09-01	2018	29050_1#262	SAMEA5189049	N/A	N/A	N/A	PRJEB30334	da Silva et al., 2022
ERR4025724	Pakistan	South Asia	4.3.1.1.P1	#78c679	2018-10-12	2018	29050_1#263	SAMEA5189128	N/A	N/A	N/A	PRJEB30334	da Silva et al., 2022
ERR4025725	Pakistan	South Asia	4.3.1.1.P1	#78c679	2018-09-01	2018	29050_1#265	SAMEA5189023	N/A	N/A	N/A	PRJEB30334	da Silva et al., 2022
ERR4025726	Pakistan	South Asia	4.3.1.1.P1	#78c679	2018-10-15	2018	29050_1#266	SAMEA5189129	N/A	N/A	N/A	PRJEB30334	da Silva et al., 2022
ERR4025727	Pakistan	South Asia	4.3.1.1.P1	#78c679	2018-09-01	2018	29050_1#270	SAMEA5189024	N/A	N/A	N/A	PRJEB30334	da Silva et al., 2022
ERR4025728	Pakistan	South Asia	4.3.1.1.P1	#78c679	2018-10-13	2018	29050_1#271	SAMEA5189130	N/A	N/A	N/A	PRJEB30334	da Silva et al., 2022
ERR4025729	Pakistan	South Asia	4.3.1.1.P1	#78c679	2018-08-28	2018	29050_1#273	SAMEA5189027	N/A	N/A	N/A	PRJEB30334	da Silva et al., 2022
ERR4025731	Pakistan	South Asia	4.3.1.1.P1	#78c679	2018-09-03	2018	29050_1#278	SAMEA5189028	N/A	N/A	N/A	PRJEB30334	da Silva et al., 2022
ERR4025732	Pakistan	South Asia	4.3.1.1.P1	#78c679	2018-10-19	2018	29050_1#279	SAMEA5189131	N/A	N/A	N/A	PRJEB30334	da Silva et al., 2022
ERR4025573	Pakistan	South Asia	4.3.1.1.P1	#78c679	2018-11-07	2018	29050_1#28	SAMEA5900040	N/A	N/A	N/A	PRJEB30334	da Silva et al., 2022
ERR4025733	Pakistan	South Asia	4.3.1.1.P1	#78c679	2018-09-03	2018	29050_1#281	SAMEA5189029	N/A	N/A	N/A	PRJEB30334	da Silva et al., 2022
ERR4025734	Pakistan	South Asia	4.3.1.1.P1	#78c679	2018-10-18	2018	29050_1#282	SAMEA5189132	N/A	N/A	N/A	PRJEB30334	da Silva et al., 2022
ERR4025735	Pakistan	South Asia	4.3.1.1.P1	#78c679	2018-09-03	2018	29050_1#286	SAMEA5189030	N/A	N/A	N/A	PRJEB30334	da Silva et al., 2022
ERR4025736	Pakistan	South Asia	4.3.1.1.P1	#78c679	2018-10-18	2018	29050_1#287	SAMEA5189133	N/A	N/A	N/A	PRJEB30334	da Silva et al., 2022
ERR4025737	Pakistan	South Asia	4.3.1.1.P1	#78c679	2018-09-01	2018	29050_1#289	SAMEA5189031	N/A	N/A	N/A	PRJEB30334	da Silva et al., 2022
ERR4025574	Pakistan	South Asia	4.3.1.1.P1	#78c679	2018-11-08	2018	29050_1#29	SAMEA5189162	N/A	N/A	N/A	PRJEB30334	da Silva et al., 2022
ERR4025738	Pakistan	South Asia	4.3.1.1.P1	#78c679	2018-10-19	2018	29050_1#290	SAMEA5189134	N/A	N/A	N/A	PRJEB30334	da Silva et al., 2022
ERR4025739	Pakistan	South Asia	4.3.1.1.P1	#78c679	2018-09-04	2018	29050_1#294	SAMEA5189033	N/A	N/A	N/A	PRJEB30334	da Silva et al., 2022
ERR4025740	Pakistan	South Asia	4.3.1.1.P1	#78c679	2018-10-15	2018	29050_1#295	SAMEA5189135	N/A	N/A	N/A	PRJEB30334	da Silva et al., 2022
ERR4025741	Pakistan	South Asia	4.3.1.1.P1	#78c679	2018-09-05	2018	29050_1#297	SAMEA5189034	N/A	N/A	N/A	PRJEB30334	da Silva et al., 2022
ERR4025742	Pakistan	South Asia	4.3.1.1.P1	#78c679	2018-10-13	2018	29050_1#298	SAMEA5189136	N/A	N/A	N/A	PRJEB30334	da Silva et al., 2022
ERR4025575	Pakistan	South Asia	4.3.1.1.P1	#78c679	2018-08-06	2018	29050_1#30	SAMEA5188966	N/A	N/A	N/A	PRJEB30334	da Silva et al., 2022
ERR4025743	Pakistan	South Asia	4.3.1.1.P1	#78c679	2018-09-01	2018	29050_1#301	SAMEA5189035	N/A	N/A	N/A	PRJEB30334	da Silva et al., 2022
ERR4025747	Pakistan	South Asia	4.3.1.1.P1	#78c679	2018-08-29	2018	29050_1#308	SAMEA5189037	N/A	N/A	N/A	PRJEB30334	da Silva et al., 2022
ERR4025749	Pakistan	South Asia	4.3.1.1.P1	#78c679	2018-09-01	2018	29050_1#312	SAMEA5189038	N/A	N/A	N/A	PRJEB30334	da Silva et al., 2022
ERR4025750	Pakistan	South Asia	4.3.1.1.P1	#78c679	2018-10-22	2018	29050_1#313	SAMEA5900039	N/A	N/A	N/A	PRJEB30334	da Silva et al., 2022
ERR4025751	Pakistan	South Asia	4.3.1.1.P1	#78c679	2018-09-01	2018	29050_1#316	SAMEA5189040	N/A	N/A	N/A	PRJEB30334	da Silva et al., 2022
ERR4025753	Pakistan	South Asia	4.3.1.1.P1	#78c679	2018-09-04	2018	29050_1#322	SAMEA5189041	N/A	N/A	N/A	PRJEB30334	da Silva et al., 2022
ERR4025754	Pakistan	South Asia	4.3.1.1.P1	#78c679	2018-10-19	2018	29050_1#323	SAMEA5189141	N/A	N/A	N/A	PRJEB30334	da Silva et al., 2022
ERR4025755	Pakistan	South Asia	4.3.1.1.P1	#78c679	2018-09-03	2018	29050_1#324	SAMEA5189042	N/A	N/A	N/A	PRJEB30334	da Silva et al., 2022
ERR4025756	Pakistan	South Asia	4.3.1.1.P1	#78c679	2018-10-22	2018	29050_1#325	SAMEA5189142	N/A	N/A	N/A	PRJEB30334	da Silva et al., 2022
ERR4025757	Pakistan	South Asia	4.3.1.1.P1	#78c679	2018-09-03	2018	29050_1#328	SAMEA5900034	N/A	N/A	N/A	PRJEB30334	da Silva et al., 2022
ERR4025758	Pakistan	South Asia	4.3.1.1.P1	#78c679	2018-10-19	2018	29050_1#329	SAMEA5189143	N/A	N/A	N/A	PRJEB30334	da Silva et al., 2022
ERR4025577	Pakistan	South Asia	4.3.1.1.P1	#78c679	2018-08-06	2018	29050_1#33	SAMEA5188967	N/A	N/A	N/A	PRJEB30334	da Silva et al., 2022
ERR4025759	Pakistan	South Asia	4.3.1.1.P1	#78c679	2018-09-03	2018	29050_1#332	SAMEA5189043	N/A	N/A	N/A	PRJEB30334	da Silva et al., 2022
ERR4025760	Pakistan	South Asia	4.3.1.1.P1	#78c679	2018-10-22	2018	29050_1#333	SAMEA5189144	N/A	N/A	N/A	PRJEB30334	da Silva et al., 2022
ERR4025761	Pakistan	South Asia	4.3.1.1.P1	#78c679	2018-09-03	2018	29050_1#336	SAMEA5189044	N/A	N/A	N/A	PRJEB30334	da Silva et al., 2022
ERR4025762	Pakistan	South Asia	4.3.1.1.P1	#78c679	2018-09-04	2018	29050_1#339	SAMEA5189045	N/A	N/A	N/A	PRJEB30334	da Silva et al., 2022
ERR4025578	Pakistan	South Asia	4.3.1.1.P1	#78c679	2018-09-13	2018	29050_1#34	SAMEA5189069	N/A	N/A	N/A	PRJEB30334	da Silva et al., 2022
ERR4025763	Pakistan	South Asia	4.3.1.1.P1	#78c679	2018-09-28	2018	29050_1#342	SAMEA5189146	N/A	N/A	N/A	PRJEB30334	da Silva et al., 2022
ERR4025764	Pakistan	South Asia	4.3.1.1.P1	#78c679	2018-10-23	2018	29050_1#343	SAMEA5189147	N/A	N/A	N/A	PRJEB30334	da Silva et al., 2022
ERR4025766	Pakistan	South Asia	4.3.1.1.P1	#78c679	2018-09-04	2018	29050_1#347	SAMEA5189051	N/A	N/A	N/A	PRJEB30334	da Silva et al., 2022
ERR4025767	Pakistan	South Asia	4.3.1.1.P1	#78c679	2018-10-24	2018	29050_1#350	SAMEA5189148	N/A	N/A	N/A	PRJEB30334	da Silva et al., 2022
ERR4025768	Pakistan	South Asia	4.3.1.1.P1	#78c679	2018-10-23	2018	29050_1#351	SAMEA5189149	N/A	N/A	N/A	PRJEB30334	da Silva et al., 2022
ERR4025769	Pakistan	South Asia	4.3.1.1.P1	#78c679	2018-09-06	2018	29050_1#352	SAMEA5189052	N/A	N/A	N/A	PRJEB30334	da Silva et al., 2022
ERR4025770	Pakistan	South Asia	4.3.1.1.P1	#78c679	2018-09-07	2018	29050_1#355	SAMEA5189054	N/A	N/A	N/A	PRJEB30334	da Silva et al., 2022
ERR4025771	Pakistan	South Asia	4.3.1.1.P1	#78c679	2018-10-24	2018	29050_1#358	SAMEA5189150	N/A	N/A	N/A	PRJEB30334	da Silva et al., 2022
ERR4025772	Pakistan	South Asia	4.3.1.1.P1	#78c679	2018-10-25	2018	29050_1#359	SAMEA5189151	N/A	N/A	N/A	PRJEB30334	da Silva et al., 2022
ERR4025579	Pakistan	South Asia	4.3.1.1.P1	#78c679	2018-11-12	2018	29050_1#36	SAMEA5189163	N/A	N/A	N/A	PRJEB30334	da Silva et al., 2022
ERR4025773	Pakistan	South Asia	4.3.1.1.P1	#78c679	2018-09-08	2018	29050_1#360	SAMEA5189055	N/A	N/A	N/A	PRJEB30334	da Silva et al., 2022
ERR4025774	Pakistan	South Asia	4.3.1.1.P1	#78c679	2018-09-08	2018	29050_1#363	SAMEA5189056	N/A	N/A	N/A	PRJEB30334	da Silva et al., 2022
ERR4025775	Pakistan	South Asia	4.3.1.1.P1	#78c679	2018-10-25	2018	29050_1#366	SAMEA5189152	N/A	N/A	N/A	PRJEB30334	da Silva et al., 2022
ERR4025776	Pakistan	South Asia	4.3.1.1.P1	#78c679	2018-10-26	2018	29050_1#367	SAMEA5900041	N/A	N/A	N/A	PRJEB30334	da Silva et al., 2022
ERR4025778	Pakistan	South Asia	4.3.1.1.P1	#78c679	2018-09-11	2018	29050_1#371	SAMEA5189058	N/A	N/A	N/A	PRJEB30334	da Silva et al., 2022
ERR4025780	Pakistan	South Asia	4.3.1.1.P1	#78c679	2018-10-26	2018	29050_1#375	SAMEA5189154	N/A	N/A	N/A	PRJEB30334	da Silva et al., 2022
ERR4025781	Pakistan	South Asia	4.3.1.1.P1	#78c679	2018-09-11	2018	29050_1#376	SAMEA5189059	N/A	N/A	N/A	PRJEB30334	da Silva et al., 2022
ERR4025581	Pakistan	South Asia	4.3.1.1.P1	#78c679	2018-08-04	2018	29050_1#38	SAMEA5188968	N/A	N/A	N/A	PRJEB30334	da Silva et al., 2022
ERR4025782	Pakistan	South Asia	4.3.1.1.P1	#78c679	2018-11-02	2018	29050_1#381	SAMEA5189155	N/A	N/A	N/A	PRJEB30334	da Silva et al., 2022
ERR4025783	Pakistan	South Asia	4.3.1.1.P1	#78c679	2018-09-12	2018	29050_1#382	SAMEA5189060	N/A	N/A	N/A	PRJEB30334	da Silva et al., 2022
ERR4025555	Pakistan	South Asia	4.3.1.1.P1	#78c679	2018-11-02	2018	29050_1#4	SAMEA5189156	N/A	N/A	N/A	PRJEB30334	da Silva et al., 2022
ERR4025584	Pakistan	South Asia	4.3.1.1.P1	#78c679	2018-09-14	2018	29050_1#42	SAMEA5189071	N/A	N/A	N/A	PRJEB30334	da Silva et al., 2022
ERR4025585	Pakistan	South Asia	4.3.1.1.P1	#78c679	2018-11-06	2018	29050_1#44	SAMEA5189165	N/A	N/A	N/A	PRJEB30334	da Silva et al., 2022
ERR4025586	Pakistan	South Asia	4.3.1.1.P1	#78c679	2018-11-05	2018	29050_1#45	SAMEA5189166	N/A	N/A	N/A	PRJEB30334	da Silva et al., 2022
ERR4025588	Pakistan	South Asia	4.3.1.1.P1	#78c679	2018-09-15	2018	29050_1#47	SAMEA5189072	N/A	N/A	N/A	PRJEB30334	da Silva et al., 2022
ERR4025589	Pakistan	South Asia	4.3.1.1.P1	#78c679	2018-08-03	2018	29050_1#49	SAMEA5188971	N/A	N/A	N/A	PRJEB30334	da Silva et al., 2022
ERR4025556	Pakistan	South Asia	4.3.1.1.P1	#78c679	2018-11-01	2018	29050_1#5	SAMEA5189157	N/A	N/A	N/A	PRJEB30334	da Silva et al., 2022
ERR4025591	Pakistan	South Asia	4.3.1.1.P1	#78c679	2018-11-12	2018	29050_1#52	SAMEA5189167	N/A	N/A	N/A	PRJEB30334	da Silva et al., 2022
ERR4025592	Pakistan	South Asia	4.3.1.1.P1	#78c679	2018-11-10	2018	29050_1#53	SAMEA5189168	N/A	N/A	N/A	PRJEB30334	da Silva et al., 2022
ERR4025593	Pakistan	South Asia	4.3.1.1.P1	#78c679	2018-08-04	2018	29050_1#54	SAMEA5188972	N/A	N/A	N/A	PRJEB30334	da Silva et al., 2022
ERR4025594	Pakistan	South Asia	4.3.1.1.P1	#78c679	2018-08-27	2018	29050_1#55	SAMEA5189074	N/A	N/A	N/A	PRJEB30334	da Silva et al., 2022
ERR4025595	Pakistan	South Asia	4.3.1.1.P1	#78c679	2018-08-04	2018	29050_1#57	SAMEA5188973	N/A	N/A	N/A	PRJEB30334	da Silva et al., 2022
ERR4025596	Pakistan	South Asia	4.3.1.1.P1	#78c679	2018-07-28	2018	29050_1#58	SAMEA5189075	N/A	N/A	N/A	PRJEB30334	da Silva et al., 2022
ERR4025557	Pakistan	South Asia	4.3.1.1.P1	#78c679	2018-07-28	2018	29050_1#6	SAMEA5188961	N/A	N/A	N/A	PRJEB30334	da Silva et al., 2022
ERR4025597	Pakistan	South Asia	4.3.1.1.P1	#78c679	2018-11-14	2018	29050_1#60	SAMEA5189169	N/A	N/A	N/A	PRJEB30334	da Silva et al., 2022
ERR4025598	Pakistan	South Asia	4.3.1.1.P1	#78c679	2018-11-17	2018	29050_1#61	SAMEA5189170	N/A	N/A	N/A	PRJEB30334	da Silva et al., 2022
ERR4025602	Pakistan	South Asia	4.3.1.1.P1	#78c679	2018-08-06	2018	29050_1#67	SAMEA5188975	N/A	N/A	N/A	PRJEB30334	da Silva et al., 2022
ERR4025603	Pakistan	South Asia	4.3.1.1.P1	#78c679	2018-09-19	2018	29050_1#68	SAMEA5189077	N/A	N/A	N/A	PRJEB30334	da Silva et al., 2022
ERR4025558	Pakistan	South Asia	4.3.1.1.P1	#78c679	2018-09-15	2018	29050_1#7	SAMEA5189062	N/A	N/A	N/A	PRJEB30334	da Silva et al., 2022
ERR4025605	Pakistan	South Asia	4.3.1.1.P1	#78c679	2018-09-10	2018	29050_1#70	SAMEA5189078	N/A	N/A	N/A	PRJEB30334	da Silva et al., 2022
ERR4025606	Pakistan	South Asia	4.3.1.1.P1	#78c679	2018-11-17	2018	29050_1#72	SAMEA5189171	N/A	N/A	N/A	PRJEB30334	da Silva et al., 2022
ERR4025608	Pakistan	South Asia	4.3.1.1.P1	#78c679	2018-08-08	2018	29050_1#74	SAMEA5188977	N/A	N/A	N/A	PRJEB30334	da Silva et al., 2022
ERR4025609	Pakistan	South Asia	4.3.1.1.P1	#78c679	2018-09-11	2018	29050_1#75	SAMEA5189079	N/A	N/A	N/A	PRJEB30334	da Silva et al., 2022
ERR4025610	Pakistan	South Asia	4.3.1.1.P1	#78c679	2018-08-09	2018	29050_1#77	SAMEA5188978	N/A	N/A	N/A	PRJEB30334	da Silva et al., 2022
ERR4025611	Pakistan	South Asia	4.3.1.1.P1	#78c679	2018-09-15	2018	29050_1#78	SAMEA5189080	N/A	N/A	N/A	PRJEB30334	da Silva et al., 2022
ERR4025612	Pakistan	South Asia	4.3.1.1.P1	#78c679	2018-11-10	2018	29050_1#80	SAMEA5189173	N/A	N/A	N/A	PRJEB30334	da Silva et al., 2022
ERR4025613	Pakistan	South Asia	4.3.1.1.P1	#78c679	2018-11-16	2018	29050_1#81	SAMEA5189174	N/A	N/A	N/A	PRJEB30334	da Silva et al., 2022
ERR4025614	Pakistan	South Asia	4.3.1.1.P1	#78c679	2018-08-09	2018	29050_1#82	SAMEA5188979	N/A	N/A	N/A	PRJEB30334	da Silva et al., 2022
ERR4025615	Pakistan	South Asia	4.3.1.1.P1	#78c679	2018-09-22	2018	29050_1#83	SAMEA5189081	N/A	N/A	N/A	PRJEB30334	da Silva et al., 2022
ERR4025616	Pakistan	South Asia	4.3.1.1.P1	#78c679	2018-08-10	2018	29050_1#85	SAMEA5188980	N/A	N/A	N/A	PRJEB30334	da Silva et al., 2022
ERR4025617	Pakistan	South Asia	4.3.1.1.P1	#78c679	2018-08-27	2018	29050_1#86	SAMEA5189082	N/A	N/A	N/A	PRJEB30334	da Silva et al., 2022
ERR4025618	Pakistan	South Asia	4.3.1.1.P1	#78c679	2018-11-19	2018	29050_1#88	SAMEA5189175	N/A	N/A	N/A	PRJEB30334	da Silva et al., 2022
ERR4025619	Pakistan	South Asia	4.3.1.1.P1	#78c679	2018-11-20	2018	29050_1#89	SAMEA5189176	N/A	N/A	N/A	PRJEB30334	da Silva et al., 2022
ERR4025559	Pakistan	South Asia	4.3.1.1.P1	#78c679	2018-07-30	2018	29050_1#9	SAMEA5188962	N/A	N/A	N/A	PRJEB30334	da Silva et al., 2022
ERR4025621	Pakistan	South Asia	4.3.1.1.P1	#78c679	2018-07-27	2018	29050_1#91	SAMEA5189084	N/A	N/A	N/A	PRJEB30334	da Silva et al., 2022
ERR4025622	Pakistan	South Asia	4.3.1.1.P1	#78c679	2018-08-08	2018	29050_1#93	SAMEA5188982	N/A	N/A	N/A	PRJEB30334	da Silva et al., 2022
ERR4025624	Pakistan	South Asia	4.3.1.1.P1	#78c679	2018-11-22	2018	29050_1#96	SAMEA5189177	N/A	N/A	N/A	PRJEB30334	da Silva et al., 2022
ERR4025626	Pakistan	South Asia	4.3.1.1.P1	#78c679	2018-08-04	2018	29050_1#98	SAMEA5188983	N/A	N/A	N/A	PRJEB30334	da Silva et al., 2022
ERR4046930	Pakistan	South Asia	4.3.1.1.P1	#78c679	2018-06-20	2018	29136_1#1	SAMEA5188861	N/A	N/A	N/A	PRJEB30334	da Silva et al., 2022
ERR4047033	Pakistan	South Asia	4.3.1.1.P1	#78c679	2018-04-05	2018	29136_1#104	SAMEA5188678	N/A	N/A	N/A	PRJEB30334	da Silva et al., 2022
ERR4047034	Pakistan	South Asia	4.3.1.1.P1	#c2e699	2017-12-27	2017	29136_1#105	SAMEA5188586	N/A	N/A	N/A	PRJEB30334	da Silva et al., 2022
ERR4047036	Pakistan	South Asia	4.3.1.1.P1	#78c679	2018-05-31	2018	29136_1#107	SAMEA5188788	N/A	N/A	N/A	PRJEB30334	da Silva et al., 2022
ERR4047037	Pakistan	South Asia	4.3.1.1.P1	#78c679	2018-07-02	2018	29136_1#108	SAMEA5188892	N/A	N/A	N/A	PRJEB30334	da Silva et al., 2022
ERR4047038	Pakistan	South Asia	4.3.1.1.P1	#78c679	2018-04-16	2018	29136_1#109	SAMEA5188679	N/A	N/A	N/A	PRJEB30334	da Silva et al., 2022
ERR4047040	Pakistan	South Asia	4.3.1.1.P1	#78c679	2018-07-04	2018	29136_1#111	SAMEA5188893	N/A	N/A	N/A	PRJEB30334	da Silva et al., 2022
ERR4047042	Pakistan	South Asia	4.3.1.1.P1	#78c679	2018-01-09	2018	29136_1#113	SAMEA5188589	N/A	N/A	N/A	PRJEB30334	da Silva et al., 2022
ERR4047043	Pakistan	South Asia	4.3.1.1.P1	#78c679	2018-05-31	2018	29136_1#114	SAMEA5900019	N/A	N/A	N/A	PRJEB30334	da Silva et al., 2022
ERR4047044	Pakistan	South Asia	4.3.1.1.P1	#78c679	2018-05-30	2018	29136_1#115	SAMEA5188789	N/A	N/A	N/A	PRJEB30334	da Silva et al., 2022
ERR4047045	Pakistan	South Asia	4.3.1.1.P1	#78c679	2018-07-04	2018	29136_1#116	SAMEA5188894	N/A	N/A	N/A	PRJEB30334	da Silva et al., 2022
ERR4047046	Pakistan	South Asia	4.3.1.1.P1	#78c679	2018-04-16	2018	29136_1#117	SAMEA5188681	N/A	N/A	N/A	PRJEB30334	da Silva et al., 2022
ERR4047051	Pakistan	South Asia	4.3.1.1.P1	#78c679	2018-07-03	2018	29136_1#122	SAMEA5188896	N/A	N/A	N/A	PRJEB30334	da Silva et al., 2022
ERR4047052	Pakistan	South Asia	4.3.1.1.P1	#78c679	2018-05-30	2018	29136_1#123	SAMEA5188791	N/A	N/A	N/A	PRJEB30334	da Silva et al., 2022
ERR4047058	Pakistan	South Asia	4.3.1.1.P1	#78c679	2018-05-31	2018	29136_1#129	SAMEA5188792	N/A	N/A	N/A	PRJEB30334	da Silva et al., 2022
ERR4047059	Pakistan	South Asia	4.3.1.1.P1	#78c679	2018-05-07	2018	29136_1#130	SAMEA5188793	N/A	N/A	N/A	PRJEB30334	da Silva et al., 2022
ERR4047061	Pakistan	South Asia	4.3.1.1.P1	#c2e699	2017-11-24	2017	29136_1#132	SAMEA5188594	N/A	N/A	N/A	PRJEB30334	da Silva et al., 2022
ERR4047062	Pakistan	South Asia	4.3.1.1.P1	#78c679	2018-07-03	2018	29136_1#133	SAMEA5188897	N/A	N/A	N/A	PRJEB30334	da Silva et al., 2022
ERR4047063	Pakistan	South Asia	4.3.1.1.P1	#c2e699	2017-11-27	2017	29136_1#134	SAMEA5900008	N/A	N/A	N/A	PRJEB30334	da Silva et al., 2022
ERR4047065	Pakistan	South Asia	4.3.1.1.P1	#78c679	2018-07-09	2018	29136_1#136	SAMEA5188898	N/A	N/A	N/A	PRJEB30334	da Silva et al., 2022
ERR4047066	Pakistan	South Asia	4.3.1.1.P1	#78c679	2018-05-31	2018	29136_1#137	SAMEA5188795	N/A	N/A	N/A	PRJEB30334	da Silva et al., 2022
ERR4047069	Pakistan	South Asia	4.3.1.1.P1	#78c679	2018-04-21	2018	29136_1#140	SAMEA5188686	N/A	N/A	N/A	PRJEB30334	da Silva et al., 2022
ERR4047072	Pakistan	South Asia	4.3.1.1.P1	#78c679	2018-03-26	2018	29136_1#143	SAMEA5188687	N/A	N/A	N/A	PRJEB30334	da Silva et al., 2022
ERR4047073	Pakistan	South Asia	4.3.1.1.P1	#78c679	2018-06-26	2018	29136_1#144	SAMEA5188900	N/A	N/A	N/A	PRJEB30334	da Silva et al., 2022
ERR4047078	Pakistan	South Asia	4.3.1.1.P1	#78c679	2018-06-27	2018	29136_1#149	SAMEA5188901	N/A	N/A	N/A	PRJEB30334	da Silva et al., 2022
ERR4047079	Pakistan	South Asia	4.3.1.1.P1	#78c679	2018-01-12	2018	29136_1#150	SAMEA5188598	N/A	N/A	N/A	PRJEB30334	da Silva et al., 2022
ERR4047080	Pakistan	South Asia	4.3.1.1.P1	#78c679	2018-04-05	2018	29136_1#151	SAMEA5188689	N/A	N/A	N/A	PRJEB30334	da Silva et al., 2022
ERR4047082	Pakistan	South Asia	4.3.1.1.P1	#78c679	2018-06-04	2018	29136_1#153	SAMEA5188801	N/A	N/A	N/A	PRJEB30334	da Silva et al., 2022
ERR4047087	Pakistan	South Asia	4.3.1.1.P1	#78c679	2018-04-06	2018	29136_1#158	SAMEA5188691	N/A	N/A	N/A	PRJEB30334	da Silva et al., 2022
ERR4047088	Pakistan	South Asia	4.3.1.1.P1	#78c679	2018-06-04	2018	29136_1#159	SAMEA5188802	N/A	N/A	N/A	PRJEB30334	da Silva et al., 2022
ERR4046945	Pakistan	South Asia	4.3.1.1.P1	#78c679	2018-06-22	2018	29136_1#16	SAMEA5188866	N/A	N/A	N/A	PRJEB30334	da Silva et al., 2022
ERR4047089	Pakistan	South Asia	4.3.1.1.P1	#78c679	2018-07-03	2018	29136_1#160	SAMEA5188904	N/A	N/A	N/A	PRJEB30334	da Silva et al., 2022
ERR4047091	Pakistan	South Asia	4.3.1.1.P1	#78c679	2018-01-16	2018	29136_1#162	SAMEA5188601	N/A	N/A	N/A	PRJEB30334	da Silva et al., 2022
ERR4047093	Pakistan	South Asia	4.3.1.1.P1	#78c679	2018-06-04	2018	29136_1#164	SAMEA5188803	N/A	N/A	N/A	PRJEB30334	da Silva et al., 2022
ERR4047094	Pakistan	South Asia	4.3.1.1.P1	#78c679	2018-06-05	2018	29136_1#165	SAMEA5188804	N/A	N/A	N/A	PRJEB30334	da Silva et al., 2022
ERR4047095	Pakistan	South Asia	4.3.1.1.P1	#78c679	2018-07-10	2018	29136_1#166	SAMEA5188906	N/A	N/A	N/A	PRJEB30334	da Silva et al., 2022
ERR4047097	Pakistan	South Asia	4.3.1.1.P1	#78c679	2018-04-05	2018	29136_1#168	SAMEA5188693	N/A	N/A	N/A	PRJEB30334	da Silva et al., 2022
ERR4046946	Pakistan	South Asia	4.3.1.1.P1	#78c679	2018-06-22	2018	29136_1#17	SAMEA5900024	N/A	N/A	N/A	PRJEB30334	da Silva et al., 2022
ERR4047100	Pakistan	South Asia	4.3.1.1.P1	#78c679	2018-04-05	2018	29136_1#171	SAMEA5900015	N/A	N/A	N/A	PRJEB30334	da Silva et al., 2022
ERR4047103	Pakistan	South Asia	4.3.1.1.P1	#78c679	2018-07-09	2018	29136_1#174	SAMEA5188908	N/A	N/A	N/A	PRJEB30334	da Silva et al., 2022
ERR4047106	Pakistan	South Asia	4.3.1.1.P1	#78c679	2018-07-09	2018	29136_1#177	SAMEA5188909	N/A	N/A	N/A	PRJEB30334	da Silva et al., 2022
ERR4047112	Pakistan	South Asia	4.3.1.1.P1	#78c679	2018-01-19	2018	29136_1#183	SAMEA5188605	N/A	N/A	N/A	PRJEB30334	da Silva et al., 2022
ERR4047113	Pakistan	South Asia	4.3.1.1.P1	#78c679	2018-04-24	2018	29136_1#184	SAMEA5188696	N/A	N/A	N/A	PRJEB30334	da Silva et al., 2022
ERR4047115	Pakistan	South Asia	4.3.1.1.P1	#78c679	2018-01-20	2018	29136_1#186	SAMEA5188606	N/A	N/A	N/A	PRJEB30334	da Silva et al., 2022
ERR4047118	Pakistan	South Asia	4.3.1.1.P1	#78c679	2018-06-04	2018	29136_1#189	SAMEA5900021	N/A	N/A	N/A	PRJEB30334	da Silva et al., 2022
ERR4046948	Pakistan	South Asia	4.3.1.1.P1	#78c679	2018-04-04	2018	29136_1#19	SAMEA5188655	N/A	N/A	N/A	PRJEB30334	da Silva et al., 2022
ERR4047119	Pakistan	South Asia	4.3.1.1.P1	#78c679	2018-07-12	2018	29136_1#190	SAMEA5188913	N/A	N/A	N/A	PRJEB30334	da Silva et al., 2022
ERR4047121	Pakistan	South Asia	4.3.1.1.P1	#78c679	2018-04-23	2018	29136_1#192	SAMEA5188698	N/A	N/A	N/A	PRJEB30334	da Silva et al., 2022
ERR4047122	Pakistan	South Asia	4.3.1.1.P1	#78c679	2018-07-12	2018	29136_1#193	SAMEA5900027	N/A	N/A	N/A	PRJEB30334	da Silva et al., 2022
ERR4047123	Pakistan	South Asia	4.3.1.1.P1	#78c679	2018-01-23	2018	29136_1#194	SAMEA5188608	N/A	N/A	N/A	PRJEB30334	da Silva et al., 2022
ERR4047124	Pakistan	South Asia	4.3.1.1.P1	#78c679	2018-04-23	2018	29136_1#195	SAMEA5188699	N/A	N/A	N/A	PRJEB30334	da Silva et al., 2022
ERR4047125	Pakistan	South Asia	4.3.1.1.P1	#78c679	2018-06-06	2018	29136_1#196	SAMEA5188810	N/A	N/A	N/A	PRJEB30334	da Silva et al., 2022
ERR4047126	Pakistan	South Asia	4.3.1.1.P1	#78c679	2018-06-08	2018	29136_1#197	SAMEA5188811	N/A	N/A	N/A	PRJEB30334	da Silva et al., 2022
ERR4047127	Pakistan	South Asia	4.3.1.1.P1	#78c679	2018-07-11	2018	29136_1#198	SAMEA5188914	N/A	N/A	N/A	PRJEB30334	da Silva et al., 2022
ERR4047128	Pakistan	South Asia	4.3.1.1.P1	#78c679	2018-01-26	2018	29136_1#199	SAMEA5188609	N/A	N/A	N/A	PRJEB30334	da Silva et al., 2022
ERR4046931	Pakistan	South Asia	4.3.1.1.P1	#78c679	2018-05-14	2018	29136_1#2	SAMEA5188746	N/A	N/A	N/A	PRJEB30334	da Silva et al., 2022
ERR4046949	Pakistan	South Asia	4.3.1.1.P1	#c2e699	2017-11-02	2017	29136_1#20	SAMEA5188561	N/A	N/A	N/A	PRJEB30334	da Silva et al., 2022
ERR4047130	Pakistan	South Asia	4.3.1.1.P1	#78c679	2018-01-29	2018	29136_1#201	SAMEA5188610	N/A	N/A	N/A	PRJEB30334	da Silva et al., 2022
ERR4047131	Pakistan	South Asia	4.3.1.1.P1	#78c679	2018-04-24	2018	29136_1#202	SAMEA5188701	N/A	N/A	N/A	PRJEB30334	da Silva et al., 2022
ERR4047132	Pakistan	South Asia	4.3.1.1.P1	#78c679	2018-06-04	2018	29136_1#203	SAMEA5188812	N/A	N/A	N/A	PRJEB30334	da Silva et al., 2022
ERR4046950	Pakistan	South Asia	4.3.1.1.P1	#78c679	2018-04-04	2018	29136_1#21	SAMEA5188656	N/A	N/A	N/A	PRJEB30334	da Silva et al., 2022
ERR4047140	Pakistan	South Asia	4.3.1.1.P1	#78c679	2018-06-08	2018	29136_1#211	SAMEA5188814	N/A	N/A	N/A	PRJEB30334	da Silva et al., 2022
ERR4047142	Pakistan	South Asia	4.3.1.1.P1	#78c679	2018-06-07	2018	29136_1#213	SAMEA5188815	N/A	N/A	N/A	PRJEB30334	da Silva et al., 2022
ERR4047143	Pakistan	South Asia	4.3.1.1.P1	#78c679	2018-07-13	2018	29136_1#214	SAMEA5188919	N/A	N/A	N/A	PRJEB30334	da Silva et al., 2022
ERR4047146	Pakistan	South Asia	4.3.1.1.P1	#78c679	2018-03-10	2018	29136_1#217	SAMEA5188615	N/A	N/A	N/A	PRJEB30334	da Silva et al., 2022
ERR4047147	Pakistan	South Asia	4.3.1.1.P1	#78c679	2018-04-25	2018	29136_1#218	SAMEA5188706	N/A	N/A	N/A	PRJEB30334	da Silva et al., 2022
ERR4047148	Pakistan	South Asia	4.3.1.1.P1	#78c679	2018-06-09	2018	29136_1#219	SAMEA5188816	N/A	N/A	N/A	PRJEB30334	da Silva et al., 2022
ERR4047149	Pakistan	South Asia	4.3.1.1.P1	#78c679	2018-07-14	2018	29136_1#220	SAMEA5188920	N/A	N/A	N/A	PRJEB30334	da Silva et al., 2022
ERR4047150	Pakistan	South Asia	4.3.1.1.P1	#78c679	2018-07-14	2018	29136_1#221	SAMEA5188921	N/A	N/A	N/A	PRJEB30334	da Silva et al., 2022
ERR4047152	Pakistan	South Asia	4.3.1.1.P1	#78c679	2018-04-26	2018	29136_1#223	SAMEA5188707	N/A	N/A	N/A	PRJEB30334	da Silva et al., 2022
ERR4047153	Pakistan	South Asia	4.3.1.1.P1	#78c679	2018-06-09	2018	29136_1#224	SAMEA5188817	N/A	N/A	N/A	PRJEB30334	da Silva et al., 2022
ERR4047154	Pakistan	South Asia	4.3.1.1.P1	#78c679	2018-03-10	2018	29136_1#225	SAMEA5188617	N/A	N/A	N/A	PRJEB30334	da Silva et al., 2022
ERR4047155	Pakistan	South Asia	4.3.1.1.P1	#78c679	2018-04-26	2018	29136_1#226	SAMEA5188708	N/A	N/A	N/A	PRJEB30334	da Silva et al., 2022
ERR4047156	Pakistan	South Asia	4.3.1.1.P1	#78c679	2018-06-09	2018	29136_1#227	SAMEA5188818	N/A	N/A	N/A	PRJEB30334	da Silva et al., 2022
ERR4047158	Pakistan	South Asia	4.3.1.1.P1	#78c679	2018-07-18	2018	29136_1#229	SAMEA5188923	N/A	N/A	N/A	PRJEB30334	da Silva et al., 2022
ERR4047159	Pakistan	South Asia	4.3.1.1.P1	#78c679	2018-02-10	2018	29136_1#230	SAMEA5188618	N/A	N/A	N/A	PRJEB30334	da Silva et al., 2022
ERR4047160	Pakistan	South Asia	4.3.1.1.P1	#78c679	2018-04-03	2018	29136_1#231	SAMEA5188709	N/A	N/A	N/A	PRJEB30334	da Silva et al., 2022
ERR4047162	Pakistan	South Asia	4.3.1.1.P1	#78c679	2018-06-11	2018	29136_1#233	SAMEA5188820	N/A	N/A	N/A	PRJEB30334	da Silva et al., 2022
ERR4047163	Pakistan	South Asia	4.3.1.1.P1	#78c679	2018-07-17	2018	29136_1#234	SAMEA5188924	N/A	N/A	N/A	PRJEB30334	da Silva et al., 2022
ERR4047164	Pakistan	South Asia	4.3.1.1.P1	#78c679	2018-03-10	2018	29136_1#235	SAMEA5188619	N/A	N/A	N/A	PRJEB30334	da Silva et al., 2022
ERR4047166	Pakistan	South Asia	4.3.1.1.P1	#78c679	2018-07-19	2018	29136_1#237	SAMEA5188925	N/A	N/A	N/A	PRJEB30334	da Silva et al., 2022
ERR4047167	Pakistan	South Asia	4.3.1.1.P1	#78c679	2018-03-10	2018	29136_1#238	SAMEA5188620	N/A	N/A	N/A	PRJEB30334	da Silva et al., 2022
ERR4047168	Pakistan	South Asia	4.3.1.1.P1	#78c679	2018-04-24	2018	29136_1#239	SAMEA5188712	N/A	N/A	N/A	PRJEB30334	da Silva et al., 2022
ERR4047169	Pakistan	South Asia	4.3.1.1.P1	#78c679	2018-06-11	2018	29136_1#240	SAMEA5188821	N/A	N/A	N/A	PRJEB30334	da Silva et al., 2022
ERR4047170	Pakistan	South Asia	4.3.1.1.P1	#78c679	2018-06-11	2018	29136_1#241	SAMEA5188822	N/A	N/A	N/A	PRJEB30334	da Silva et al., 2022
ERR4047171	Pakistan	South Asia	4.3.1.1.P1	#78c679	2018-07-18	2018	29136_1#242	SAMEA5900028	N/A	N/A	N/A	PRJEB30334	da Silva et al., 2022
ERR4047172	Pakistan	South Asia	4.3.1.1.P1	#78c679	2018-03-03	2018	29136_1#243	SAMEA5900010	N/A	N/A	N/A	PRJEB30334	da Silva et al., 2022
ERR4047173	Pakistan	South Asia	4.3.1.1.P1	#78c679	2018-04-30	2018	29136_1#244	SAMEA5188713	N/A	N/A	N/A	PRJEB30334	da Silva et al., 2022
ERR4047175	Pakistan	South Asia	4.3.1.1.P1	#78c679	2018-03-03	2018	29136_1#246	SAMEA5188621	N/A	N/A	N/A	PRJEB30334	da Silva et al., 2022
ERR4047176	Pakistan	South Asia	4.3.1.1.P1	#78c679	2018-05-02	2018	29136_1#247	SAMEA5188714	N/A	N/A	N/A	PRJEB30334	da Silva et al., 2022
ERR4047177	Pakistan	South Asia	4.3.1.1.P1	#78c679	2018-06-11	2018	29136_1#248	SAMEA5188823	N/A	N/A	N/A	PRJEB30334	da Silva et al., 2022
ERR4047178	Pakistan	South Asia	4.3.1.1.P1	#78c679	2018-06-11	2018	29136_1#249	SAMEA5900022	N/A	N/A	N/A	PRJEB30334	da Silva et al., 2022
ERR4046954	Pakistan	South Asia	4.3.1.1.P1	#78c679	2018-04-03	2018	29136_1#25	SAMEA5188657	N/A	N/A	N/A	PRJEB30334	da Silva et al., 2022
ERR4047179	Pakistan	South Asia	4.3.1.1.P1	#78c679	2018-07-17	2018	29136_1#250	SAMEA5188928	N/A	N/A	N/A	PRJEB30334	da Silva et al., 2022
ERR4047181	Pakistan	South Asia	4.3.1.1.P1	#78c679	2018-05-02	2018	29136_1#252	SAMEA5188715	N/A	N/A	N/A	PRJEB30334	da Silva et al., 2022
ERR4047182	Pakistan	South Asia	4.3.1.1.P1	#78c679	2018-07-18	2018	29136_1#253	SAMEA5188929	N/A	N/A	N/A	PRJEB30334	da Silva et al., 2022
ERR4047183	Pakistan	South Asia	4.3.1.1.P1	#78c679	2018-03-06	2018	29136_1#254	SAMEA5188623	N/A	N/A	N/A	PRJEB30334	da Silva et al., 2022
ERR4047184	Pakistan	South Asia	4.3.1.1.P1	#78c679	2018-05-02	2018	29136_1#255	SAMEA5188716	N/A	N/A	N/A	PRJEB30334	da Silva et al., 2022
ERR4047185	Pakistan	South Asia	4.3.1.1.P1	#78c679	2018-06-13	2018	29136_1#256	SAMEA5188824	N/A	N/A	N/A	PRJEB30334	da Silva et al., 2022
ERR4047186	Pakistan	South Asia	4.3.1.1.P1	#78c679	2018-06-12	2018	29136_1#257	SAMEA5188825	N/A	N/A	N/A	PRJEB30334	da Silva et al., 2022
ERR4047187	Pakistan	South Asia	4.3.1.1.P1	#78c679	2018-07-19	2018	29136_1#258	SAMEA5188930	N/A	N/A	N/A	PRJEB30334	da Silva et al., 2022
ERR4046955	Pakistan	South Asia	4.3.1.1.P1	#78c679	2018-05-17	2018	29136_1#26	SAMEA5188759	N/A	N/A	N/A	PRJEB30334	da Silva et al., 2022
ERR4047189	Pakistan	South Asia	4.3.1.1.P1	#78c679	2018-05-02	2018	29136_1#260	SAMEA5188717	N/A	N/A	N/A	PRJEB30334	da Silva et al., 2022
ERR4047191	Pakistan	South Asia	4.3.1.1.P1	#78c679	2018-05-05	2018	29136_1#262	SAMEA5188720	N/A	N/A	N/A	PRJEB30334	da Silva et al., 2022
ERR4047192	Pakistan	South Asia	4.3.1.1.P1	#78c679	2018-06-20	2018	29136_1#263	SAMEA5188826	N/A	N/A	N/A	PRJEB30334	da Silva et al., 2022
ERR4047193	Pakistan	South Asia	4.3.1.1.P1	#78c679	2018-06-25	2018	29136_1#264	SAMEA5188931	N/A	N/A	N/A	PRJEB30334	da Silva et al., 2022
ERR4047194	Pakistan	South Asia	4.3.1.1.P1	#78c679	2018-06-13	2018	29136_1#265	SAMEA5188827	N/A	N/A	N/A	PRJEB30334	da Silva et al., 2022
ERR4047195	Pakistan	South Asia	4.3.1.1.P1	#78c679	2018-06-23	2018	29136_1#266	SAMEA5188932	N/A	N/A	N/A	PRJEB30334	da Silva et al., 2022
ERR4047197	Pakistan	South Asia	4.3.1.1.P1	#78c679	2018-05-05	2018	29136_1#268	SAMEA5188721	N/A	N/A	N/A	PRJEB30334	da Silva et al., 2022
ERR4047198	Pakistan	South Asia	4.3.1.1.P1	#78c679	2018-03-13	2018	29136_1#269	SAMEA5188627	N/A	N/A	N/A	PRJEB30334	da Silva et al., 2022
ERR4047200	Pakistan	South Asia	4.3.1.1.P1	#78c679	2018-06-14	2018	29136_1#271	SAMEA5188828	N/A	N/A	N/A	PRJEB30334	da Silva et al., 2022
ERR4047201	Pakistan	South Asia	4.3.1.1.P1	#78c679	2018-06-25	2018	29136_1#272	SAMEA5188933	N/A	N/A	N/A	PRJEB30334	da Silva et al., 2022
ERR4047202	Pakistan	South Asia	4.3.1.1.P1	#78c679	2018-06-09	2018	29136_1#273	SAMEA5188830	N/A	N/A	N/A	PRJEB30334	da Silva et al., 2022
ERR4047203	Pakistan	South Asia	4.3.1.1.P1	#78c679	2018-06-08	2018	29136_1#274	SAMEA5188934	N/A	N/A	N/A	PRJEB30334	da Silva et al., 2022
ERR4047205	Pakistan	South Asia	4.3.1.1.P1	#78c679	2018-05-09	2018	29136_1#276	SAMEA5188724	N/A	N/A	N/A	PRJEB30334	da Silva et al., 2022
ERR4046957	Pakistan	South Asia	4.3.1.1.P1	#78c679	2018-04-04	2018	29136_1#28	SAMEA5900012	N/A	N/A	N/A	PRJEB30334	da Silva et al., 2022
ERR4047209	Pakistan	South Asia	4.3.1.1.P1	#78c679	2018-05-10	2018	29136_1#280	SAMEA5900029	N/A	N/A	N/A	PRJEB30334	da Silva et al., 2022
ERR4047211	Pakistan	South Asia	4.3.1.1.P1	#78c679	2018-06-23	2018	29136_1#282	SAMEA5188935	N/A	N/A	N/A	PRJEB30334	da Silva et al., 2022
ERR4047212	Pakistan	South Asia	4.3.1.1.P1	#78c679	2018-03-17	2018	29136_1#283	SAMEA5188630	N/A	N/A	N/A	PRJEB30334	da Silva et al., 2022
ERR4047213	Pakistan	South Asia	4.3.1.1.P1	#78c679	2018-05-08	2018	29136_1#284	SAMEA5188726	N/A	N/A	N/A	PRJEB30334	da Silva et al., 2022
ERR4047214	Pakistan	South Asia	4.3.1.1.P1	#78c679	2018-03-17	2018	29136_1#285	SAMEA5188631	N/A	N/A	N/A	PRJEB30334	da Silva et al., 2022
ERR4047215	Pakistan	South Asia	4.3.1.1.P1	#78c679	2018-05-09	2018	29136_1#286	SAMEA5188727	N/A	N/A	N/A	PRJEB30334	da Silva et al., 2022
ERR4047217	Pakistan	South Asia	4.3.1.1.P1	#c2e699	2017-01-01	2017	29136_1#288	SAMEA5188937	N/A	N/A	N/A	PRJEB30334	da Silva et al., 2022
ERR4046958	Pakistan	South Asia	4.3.1.1.P1	#78c679	2018-06-25	2018	29136_1#29	SAMEA5188869	N/A	N/A	N/A	PRJEB30334	da Silva et al., 2022
ERR4047220	Pakistan	South Asia	4.3.1.1.P1	#78c679	2018-05-10	2018	29136_1#291	SAMEA5188728	N/A	N/A	N/A	PRJEB30334	da Silva et al., 2022
ERR4047222	Pakistan	South Asia	4.3.1.1.P1	#78c679	2018-05-23	2018	29136_1#293	SAMEA5188837	N/A	N/A	N/A	PRJEB30334	da Silva et al., 2022
ERR4047223	Pakistan	South Asia	4.3.1.1.P1	#78c679	2018-07-03	2018	29136_1#294	SAMEA5188939	N/A	N/A	N/A	PRJEB30334	da Silva et al., 2022
ERR4047224	Pakistan	South Asia	4.3.1.1.P1	#78c679	2018-03-20	2018	29136_1#295	SAMEA5188633	N/A	N/A	N/A	PRJEB30334	da Silva et al., 2022
ERR4047225	Pakistan	South Asia	4.3.1.1.P1	#78c679	2018-05-10	2018	29136_1#296	SAMEA5188729	N/A	N/A	N/A	PRJEB30334	da Silva et al., 2022
ERR4047227	Pakistan	South Asia	4.3.1.1.P1	#78c679	2018-03-20	2018	29136_1#298	SAMEA5188634	N/A	N/A	N/A	PRJEB30334	da Silva et al., 2022
ERR4047229	Pakistan	South Asia	4.3.1.1.P1	#78c679	2018-05-10	2018	29136_1#300	SAMEA5188838	N/A	N/A	N/A	PRJEB30334	da Silva et al., 2022
ERR4047232	Pakistan	South Asia	4.3.1.1.P1	#78c679	2018-03-22	2018	29136_1#303	SAMEA5188635	N/A	N/A	N/A	PRJEB30334	da Silva et al., 2022
ERR4047234	Pakistan	South Asia	4.3.1.1.P1	#78c679	2018-07-23	2018	29136_1#305	SAMEA5188943	N/A	N/A	N/A	PRJEB30334	da Silva et al., 2022
ERR4047235	Pakistan	South Asia	4.3.1.1.P1	#78c679	2018-03-20	2018	29136_1#306	SAMEA5188636	N/A	N/A	N/A	PRJEB30334	da Silva et al., 2022
ERR4047236	Pakistan	South Asia	4.3.1.1.P1	#78c679	2018-05-12	2018	29136_1#307	SAMEA5188732	N/A	N/A	N/A	PRJEB30334	da Silva et al., 2022
ERR4047237	Pakistan	South Asia	4.3.1.1.P1	#78c679	2018-05-26	2018	29136_1#308	SAMEA5188840	N/A	N/A	N/A	PRJEB30334	da Silva et al., 2022
ERR4047238	Pakistan	South Asia	4.3.1.1.P1	#78c679	2018-05-19	2018	29136_1#309	SAMEA5188841	N/A	N/A	N/A	PRJEB30334	da Silva et al., 2022
ERR4047239	Pakistan	South Asia	4.3.1.1.P1	#78c679	2018-07-23	2018	29136_1#310	SAMEA5188944	N/A	N/A	N/A	PRJEB30334	da Silva et al., 2022
ERR4047241	Pakistan	South Asia	4.3.1.1.P1	#78c679	2018-04-16	2018	29136_1#312	SAMEA5188733	N/A	N/A	N/A	PRJEB30334	da Silva et al., 2022
ERR4047242	Pakistan	South Asia	4.3.1.1.P1	#78c679	2018-07-23	2018	29136_1#313	SAMEA5188945	N/A	N/A	N/A	PRJEB30334	da Silva et al., 2022
ERR4047243	Pakistan	South Asia	4.3.1.1.P1	#78c679	2018-03-17	2018	29136_1#314	SAMEA5188638	N/A	N/A	N/A	PRJEB30334	da Silva et al., 2022
ERR4047247	Pakistan	South Asia	4.3.1.1.P1	#78c679	2018-07-24	2018	29136_1#318	SAMEA5188947	N/A	N/A	N/A	PRJEB30334	da Silva et al., 2022
ERR4047249	Pakistan	South Asia	4.3.1.1.P1	#78c679	2018-05-05	2018	29136_1#320	SAMEA5188735	N/A	N/A	N/A	PRJEB30334	da Silva et al., 2022
ERR4047250	Pakistan	South Asia	4.3.1.1.P1	#78c679	2018-07-20	2018	29136_1#321	SAMEA5188948	N/A	N/A	N/A	PRJEB30334	da Silva et al., 2022
ERR4047253	Pakistan	South Asia	4.3.1.1.P1	#78c679	2018-06-12	2018	29136_1#324	SAMEA5188844	N/A	N/A	N/A	PRJEB30334	da Silva et al., 2022
ERR4047254	Pakistan	South Asia	4.3.1.1.P1	#78c679	2018-06-12	2018	29136_1#325	SAMEA5188845	N/A	N/A	N/A	PRJEB30334	da Silva et al., 2022
ERR4047255	Pakistan	South Asia	4.3.1.1.P1	#78c679	2018-07-20	2018	29136_1#326	SAMEA5188949	N/A	N/A	N/A	PRJEB30334	da Silva et al., 2022
ERR4047257	Pakistan	South Asia	4.3.1.1.P1	#78c679	2018-03-10	2018	29136_1#328	SAMEA5188737	N/A	N/A	N/A	PRJEB30334	da Silva et al., 2022
ERR4047258	Pakistan	South Asia	4.3.1.1.P1	#78c679	2018-03-26	2018	29136_1#329	SAMEA5188641	N/A	N/A	N/A	PRJEB30334	da Silva et al., 2022
ERR4047259	Pakistan	South Asia	4.3.1.1.P1	#78c679	2018-05-05	2018	29136_1#330	SAMEA5188738	N/A	N/A	N/A	PRJEB30334	da Silva et al., 2022
ERR4047260	Pakistan	South Asia	4.3.1.1.P1	#78c679	2018-06-13	2018	29136_1#331	SAMEA5188846	N/A	N/A	N/A	PRJEB30334	da Silva et al., 2022
ERR4047262	Pakistan	South Asia	4.3.1.1.P1	#78c679	2018-06-19	2018	29136_1#333	SAMEA5188847	N/A	N/A	N/A	PRJEB30334	da Silva et al., 2022
ERR4047263	Pakistan	South Asia	4.3.1.1.P1	#78c679	2018-07-23	2018	29136_1#334	SAMEA5188953	N/A	N/A	N/A	PRJEB30334	da Silva et al., 2022
ERR4047264	Pakistan	South Asia	4.3.1.1.P1	#78c679	2018-03-27	2018	29136_1#335	SAMEA5188642	N/A	N/A	N/A	PRJEB30334	da Silva et al., 2022
ERR4047270	Pakistan	South Asia	4.3.1.1.P1	#78c679	2018-06-19	2018	29136_1#341	SAMEA5188849	N/A	N/A	N/A	PRJEB30334	da Silva et al., 2022
ERR4047271	Pakistan	South Asia	4.3.1.1.P1	#78c679	2018-07-23	2018	29136_1#342	SAMEA5188955	N/A	N/A	N/A	PRJEB30334	da Silva et al., 2022
ERR4047276	Pakistan	South Asia	4.3.1.1.P1	#78c679	2018-06-19	2018	29136_1#347	SAMEA5188851	N/A	N/A	N/A	PRJEB30334	da Silva et al., 2022
ERR4047280	Pakistan	South Asia	4.3.1.1.P1	#78c679	2018-03-31	2018	29136_1#351	SAMEA5188646	N/A	N/A	N/A	PRJEB30334	da Silva et al., 2022
ERR4047281	Pakistan	South Asia	4.3.1.1.P1	#78c679	2018-06-19	2018	29136_1#352	SAMEA5188852	N/A	N/A	N/A	PRJEB30334	da Silva et al., 2022
ERR4047282	Pakistan	South Asia	4.3.1.1.P1	#78c679	2018-05-14	2018	29136_1#353	SAMEA5188744	N/A	N/A	N/A	PRJEB30334	da Silva et al., 2022
ERR4047283	Pakistan	South Asia	4.3.1.1.P1	#78c679	2018-03-30	2018	29136_1#354	SAMEA5188647	N/A	N/A	N/A	PRJEB30334	da Silva et al., 2022
ERR4047284	Pakistan	South Asia	4.3.1.1.P1	#78c679	2018-06-20	2018	29136_1#355	SAMEA5188857	N/A	N/A	N/A	PRJEB30334	da Silva et al., 2022
ERR4047285	Pakistan	South Asia	4.3.1.1.P1	#78c679	2018-07-04	2018	29136_1#356	SAMEA5188958	N/A	N/A	N/A	PRJEB30334	da Silva et al., 2022
ERR4047288	Pakistan	South Asia	4.3.1.1.P1	#78c679	2018-03-31	2018	29136_1#359	SAMEA5188648	N/A	N/A	N/A	PRJEB30334	da Silva et al., 2022
ERR4047289	Pakistan	South Asia	4.3.1.1.P1	#78c679	2018-06-20	2018	29136_1#360	SAMEA5188858	N/A	N/A	N/A	PRJEB30334	da Silva et al., 2022
ERR4046968	Pakistan	South Asia	4.3.1.1.P1	#78c679	2018-05-19	2018	29136_1#39	SAMEA5188776	N/A	N/A	N/A	PRJEB30334	da Silva et al., 2022
ERR4046933	Pakistan	South Asia	4.3.1.1.P1	#78c679	2018-03-31	2018	29136_1#4	SAMEA5188649	N/A	N/A	N/A	PRJEB30334	da Silva et al., 2022
ERR4046969	Pakistan	South Asia	4.3.1.1.P1	#78c679	2018-06-25	2018	29136_1#40	SAMEA5188873	N/A	N/A	N/A	PRJEB30334	da Silva et al., 2022
ERR4046970	Pakistan	South Asia	4.3.1.1.P1	#78c679	2018-06-23	2018	29136_1#41	SAMEA5188874	N/A	N/A	N/A	PRJEB30334	da Silva et al., 2022
ERR4046971	Pakistan	South Asia	4.3.1.1.P1	#c2e699	2017-11-22	2017	29136_1#42	SAMEA5188568	N/A	N/A	N/A	PRJEB30334	da Silva et al., 2022
ERR4046972	Pakistan	South Asia	4.3.1.1.P1	#78c679	2018-04-05	2018	29136_1#43	SAMEA5188662	N/A	N/A	N/A	PRJEB30334	da Silva et al., 2022
ERR4046973	Pakistan	South Asia	4.3.1.1.P1	#78c679	2018-05-19	2018	29136_1#44	SAMEA5900018	N/A	N/A	N/A	PRJEB30334	da Silva et al., 2022
ERR4046974	Pakistan	South Asia	4.3.1.1.P1	#78c679	2018-06-25	2018	29136_1#45	SAMEA5188875	N/A	N/A	N/A	PRJEB30334	da Silva et al., 2022
ERR4046975	Pakistan	South Asia	4.3.1.1.P1	#c2e699	2017-11-28	2017	29136_1#46	SAMEA5188569	N/A	N/A	N/A	PRJEB30334	da Silva et al., 2022
ERR4046976	Pakistan	South Asia	4.3.1.1.P1	#78c679	2018-04-05	2018	29136_1#47	SAMEA5188663	N/A	N/A	N/A	PRJEB30334	da Silva et al., 2022
ERR4046977	Pakistan	South Asia	4.3.1.1.P1	#78c679	2018-06-26	2018	29136_1#48	SAMEA5188876	N/A	N/A	N/A	PRJEB30334	da Silva et al., 2022
ERR4046978	Pakistan	South Asia	4.3.1.1.P1	#78c679	2018-05-21	2018	29136_1#49	SAMEA5188778	N/A	N/A	N/A	PRJEB30334	da Silva et al., 2022
ERR4046981	Pakistan	South Asia	4.3.1.1.P1	#78c679	2018-06-27	2018	29136_1#52	SAMEA5188877	N/A	N/A	N/A	PRJEB30334	da Silva et al., 2022
ERR4046982	Pakistan	South Asia	4.3.1.1.P1	#78c679	2018-04-06	2018	29136_1#53	SAMEA5188665	N/A	N/A	N/A	PRJEB30334	da Silva et al., 2022
ERR4046984	Pakistan	South Asia	4.3.1.1.P1	#78c679	2018-06-27	2018	29136_1#55	SAMEA5188878	N/A	N/A	N/A	PRJEB30334	da Silva et al., 2022
ERR4046986	Pakistan	South Asia	4.3.1.1.P1	#c2e699	2017-12-04	2017	29136_1#57	SAMEA5188572	N/A	N/A	N/A	PRJEB30334	da Silva et al., 2022
ERR4046935	Pakistan	South Asia	4.3.1.1.P1	#78c679	2018-03-30	2018	29136_1#6	SAMEA5188650	N/A	N/A	N/A	PRJEB30334	da Silva et al., 2022
ERR4046991	Pakistan	South Asia	4.3.1.1.P1	#78c679	2018-04-06	2018	29136_1#62	SAMEA5188668	N/A	N/A	N/A	PRJEB30334	da Silva et al., 2022
ERR4046993	Pakistan	South Asia	4.3.1.1.P1	#78c679	2018-06-30	2018	29136_1#64	SAMEA5188880	N/A	N/A	N/A	PRJEB30334	da Silva et al., 2022
ERR4046996	Pakistan	South Asia	4.3.1.1.P1	#c2e699	2017-12-15	2017	29136_1#67	SAMEA5188575	N/A	N/A	N/A	PRJEB30334	da Silva et al., 2022
ERR4046997	Pakistan	South Asia	4.3.1.1.P1	#78c679	2018-06-30	2018	29136_1#68	SAMEA5188881	N/A	N/A	N/A	PRJEB30334	da Silva et al., 2022
ERR4046998	Pakistan	South Asia	4.3.1.1.P1	#78c679	2018-05-25	2018	29136_1#69	SAMEA5188784	N/A	N/A	N/A	PRJEB30334	da Silva et al., 2022
ERR4046999	Pakistan	South Asia	4.3.1.1.P1	#78c679	2018-04-13	2018	29136_1#70	SAMEA5188669	N/A	N/A	N/A	PRJEB30334	da Silva et al., 2022
ERR4047000	Pakistan	South Asia	4.3.1.1.P1	#c2e699	2017-12-19	2017	29136_1#71	SAMEA5188576	N/A	N/A	N/A	PRJEB30334	da Silva et al., 2022
ERR4047005	Pakistan	South Asia	4.3.1.1.P1	#78c679	2018-06-30	2018	29136_1#76	SAMEA5188883	N/A	N/A	N/A	PRJEB30334	da Silva et al., 2022
ERR4047006	Pakistan	South Asia	4.3.1.1.P1	#78c679	2018-05-24	2018	29136_1#77	SAMEA5188786	N/A	N/A	N/A	PRJEB30334	da Silva et al., 2022
ERR4047007	Pakistan	South Asia	4.3.1.1.P1	#78c679	2018-04-09	2018	29136_1#78	SAMEA5188671	N/A	N/A	N/A	PRJEB30334	da Silva et al., 2022
ERR4046937	Pakistan	South Asia	4.3.1.1.P1	#78c679	2018-04-02	2018	29136_1#8	SAMEA5188651	N/A	N/A	N/A	PRJEB30334	da Silva et al., 2022
ERR4047009	Pakistan	South Asia	4.3.1.1.P1	#78c679	2018-06-26	2018	29136_1#80	SAMEA5188884	N/A	N/A	N/A	PRJEB30334	da Silva et al., 2022
ERR4047010	Pakistan	South Asia	4.3.1.1.P1	#78c679	2018-05-24	2018	29136_1#81	SAMEA5188787	N/A	N/A	N/A	PRJEB30334	da Silva et al., 2022
ERR4047011	Pakistan	South Asia	4.3.1.1.P1	#78c679	2018-04-09	2018	29136_1#82	SAMEA5188672	N/A	N/A	N/A	PRJEB30334	da Silva et al., 2022
ERR4047013	Pakistan	South Asia	4.3.1.1.P1	#78c679	2018-06-27	2018	29136_1#84	SAMEA5188885	N/A	N/A	N/A	PRJEB30334	da Silva et al., 2022
ERR4047014	Pakistan	South Asia	4.3.1.1.P1	#78c679	2018-04-11	2018	29136_1#85	SAMEA5188673	N/A	N/A	N/A	PRJEB30334	da Silva et al., 2022
ERR4047016	Pakistan	South Asia	4.3.1.1.P1	#78c679	2018-06-30	2018	29136_1#87	SAMEA5188886	N/A	N/A	N/A	PRJEB30334	da Silva et al., 2022
ERR4047018	Pakistan	South Asia	4.3.1.1.P1	#78c679	2018-04-11	2018	29136_1#89	SAMEA5188674	N/A	N/A	N/A	PRJEB30334	da Silva et al., 2022
ERR4047020	Pakistan	South Asia	4.3.1.1.P1	#78c679	2018-04-12	2018	29136_1#91	SAMEA5188675	N/A	N/A	N/A	PRJEB30334	da Silva et al., 2022
ERR4047022	Pakistan	South Asia	4.3.1.1.P1	#78c679	2018-05-19	2018	29136_1#93	SAMEA5188765	N/A	N/A	N/A	PRJEB30334	da Silva et al., 2022
ERR4047023	Pakistan	South Asia	4.3.1.1.P1	#78c679	2018-07-02	2018	29136_1#94	SAMEA5900025	N/A	N/A	N/A	PRJEB30334	da Silva et al., 2022
ERR4047024	Pakistan	South Asia	4.3.1.1.P1	#78c679	2018-07-02	2018	29136_1#95	SAMEA5188888	N/A	N/A	N/A	PRJEB30334	da Silva et al., 2022
ERR4047026	Pakistan	South Asia	4.3.1.1.P1	#c2e699	2017-12-21	2017	29136_1#97	SAMEA5188584	N/A	N/A	N/A	PRJEB30334	da Silva et al., 2022
ERR4047027	Pakistan	South Asia	4.3.1.1.P1	#78c679	2018-05-29	2018	29136_1#98	SAMEA5188766	N/A	N/A	N/A	PRJEB30334	da Silva et al., 2022
ERR4189447	Pakistan	South Asia	4.3.1.1.P1	#78c679	2018-10-20	2018	29594_4#102	SAMEA5189145	N/A	N/A	N/A	PRJEB30334	da Silva et al., 2022
ERR4189425	Pakistan	South Asia	4.3.1.1.P1	#78c679	2018-04-18	2018	29594_4#12	SAMEA5188747	N/A	N/A	N/A	PRJEB30334	da Silva et al., 2022
ERR4189426	Pakistan	South Asia	4.3.1.1.P1	#78c679	2018-05-09	2018	29594_4#16	SAMEA5188748	N/A	N/A	N/A	PRJEB30334	da Silva et al., 2022
ERR4899184	Pakistan	South Asia	4.3.1.1.P1	#78c679	2018-05-16	2018	29594_4#28	SAMEA5188757	N/A	N/A	N/A	PRJEB30334	da Silva et al., 2022
ERR4189429	Pakistan	South Asia	4.3.1.1.P1	#78c679	2018-05-17	2018	29594_4#29	SAMEA5188758	N/A	N/A	N/A	PRJEB30334	da Silva et al., 2022
ERR4189430	Pakistan	South Asia	4.3.1.1.P1	#78c679	2018-05-19	2018	29594_4#33	SAMEA5900017	N/A	N/A	N/A	PRJEB30334	da Silva et al., 2022
ERR4189431	Pakistan	South Asia	4.3.1.1.P1	#78c679	2018-05-18	2018	29594_4#37	SAMEA5188770	N/A	N/A	N/A	PRJEB30334	da Silva et al., 2022
ERR4189432	Pakistan	South Asia	4.3.1.1.P1	#78c679	2018-05-19	2018	29594_4#41	SAMEA5188771	N/A	N/A	N/A	PRJEB30334	da Silva et al., 2022
ERR4189434	Pakistan	South Asia	4.3.1.1.P1	#78c679	2018-05-23	2018	29594_4#49	SAMEA5188779	N/A	N/A	N/A	PRJEB30334	da Silva et al., 2022
ERR4189436	Pakistan	South Asia	4.3.1.1.P1	#78c679	2018-05-24	2018	29594_4#58	SAMEA5188763	N/A	N/A	N/A	PRJEB30334	da Silva et al., 2022
ERR4189437	Pakistan	South Asia	4.3.1.1.P1	#78c679	2018-06-20	2018	29594_4#62	SAMEA5188862	N/A	N/A	N/A	PRJEB30334	da Silva et al., 2022
ERR4189438	Pakistan	South Asia	4.3.1.1.P1	#78c679	2018-06-20	2018	29594_4#66	SAMEA5188863	N/A	N/A	N/A	PRJEB30334	da Silva et al., 2022
ERR4189440	Pakistan	South Asia	4.3.1.1.P1	#78c679	2018-06-28	2018	29594_4#74	SAMEA5188865	N/A	N/A	N/A	PRJEB30334	da Silva et al., 2022
ERR4189441	Pakistan	South Asia	4.3.1.1.P1	#78c679	2018-03-31	2018	29594_4#78	SAMEA5188871	N/A	N/A	N/A	PRJEB30334	da Silva et al., 2022
ERR4189442	Pakistan	South Asia	4.3.1.1.P1	#78c679	2018-06-25	2018	29594_4#82	SAMEA5188872	N/A	N/A	N/A	PRJEB30334	da Silva et al., 2022
ERR4189444	Pakistan	South Asia	4.3.1.1.P1	#78c679	2018-06-30	2018	29594_4#90	SAMEA5188887	N/A	N/A	N/A	PRJEB30334	da Silva et al., 2022
S3	Hong Kong	Hong Kong	4.3.1.1.P1	#238443	2022	2022	S3	SAMN32935253	N/A	N/A	N/A	PRJNA910287	This study

## Sheet: Table S3 genotype 2.3.4
Reads_id	Country/region	Region	Type	color code	Collecting date	strain name	Biosample	Assembly	Assembly Name	WGS project accession	BioProject	Source
ERR6294486	Nepal	South Asia	2.3.4	#b2df8a	2017	28632_6#279	SAMEA9403957	N/A	N/A	N/A	PRJEB30334	da Silva et al., 2022
ERR1837178	Nepal	South Asia	2.3.4	#b2df8a	2011	2355a760-1b6d-11e6-a6b2-3c4a9275d6c8	SAMEA80504668	N/A	N/A	N/A	PRJEB14050	Britto et al., 2018
ERR1837222	Nepal	South Asia	2.3.4	#b2df8a	2009	2dd86380-1b6d-11e6-a6b2-3c4a9275d6c8	SAMEA80537668	N/A	N/A	N/A	PRJEB14050	Britto et al., 2018
ERR326660	Laos	Southeast Asia	2.3.4	#fdbf6f	2009	LNT1197	SAMEA2059365	GCA_001106045.1	9953_5#64	CJYI01	PRJEB3215	Wong et al., 2015
ERR326665	Laos	Southeast Asia	2.3.4	#fdbf6f	2010	LNT1365	SAMEA2056533	GCA_001134365.1	9953_5#69	CJYN01	PRJEB3215	Wong et al., 2015
ERR326666	Laos	Southeast Asia	2.3.4	#fdbf6f	2010	LNT1367-3	SAMEA2059367	GCA_001361235.1	9953_5#70	CIJX01	PRJEB3215	Wong et al., 2015
ERR326668	Laos	Southeast Asia	2.3.4	#fdbf6f	2010	LNT1377	SAMEA2056534	GCA_001124885.1	9953_5#72	CJYP01	PRJEB3215	Wong et al., 2015
ERR326684	Laos	Southeast Asia	2.3.4	#fdbf6f	2008	LNT662	SAMEA2059372	GCA_001361275.1	9953_5#88	CHMP01	PRJEB3215	Wong et al., 2015
ERR326688	Laos	Southeast Asia	2.3.4	#fdbf6f	2007	LNT72	SAMEA1964060	GCA_001168825.1	9953_5#92	CJZF01	PRJEB3215	Wong et al., 2015
ERR331298	Laos	Southeast Asia	2.3.4	#fdbf6f	2009	LNT757	SAMEA2059524	GCA_001081925.1	10060_6#1	CIOE01	PRJEB3215	Wong et al., 2015
ERR331316	Laos	Southeast Asia	2.3.4	#fdbf6f	2007	UI10006	SAMEA2059530	GCA_001361375.1	10060_6#19	CGKD01	PRJEB3215	Wong et al., 2015
ERR340808	Laos	Southeast Asia	2.3.4	#fdbf6f	2002	UI3146	SAMEA2064551	GCA_001361715.1	10209_5#52	CGLL01	PRJEB3215	Wong et al., 2015
ERR340810	Laos	Southeast Asia	2.3.4	#fdbf6f	2002	UI3151	SAMEA2067827	GCA_001362035.1	10209_5#54	CHLH01	PRJEB3215	Wong et al., 2015
ERR349376	Vietnam	Southeast Asia	2.3.4	#fdbf6f	1997	ipt57	SAMEA2162124	GCA_001241805.1	10425_1#46	CUYQ01	PRJEB3215	Wong et al., 2015
ERR352269	China	East Asia	2.3.4	#bcbcbc	2011	MDUST154	SAMEA2152199	GCA_001089565.1	10492_1#16	CIYY01	PRJEB3215	Wong et al., 2015
ERR586799	Thailand	Southeast Asia	2.3.4	#fdbf6f	1981	Thai_typhi_016-sc-1931266	SAMEA2494151	N/A	N/A	N/A	PRJEB5281	Dyson et., 2017
S7	Hong Kong	East Asia	2.3.4	#bcbcbc	2022	S7	SAMN33346708	N/A	N/A	N/A	PRJNA910287	This study
